# Supplementary material for: Efficacy and Safety of LixiLan, a Titratable Fixed-Ratio Combination of Insulin Glargine Plus Lixisenatide in Type 2 Diabetes Inadequately Controlled on Basal Insulin and Metformin: The LixiLan-L Randomized Trial
Source: Oxford University Press journal article supplement (doi:10.2337/dc16-1495), 2016-09-20
Supplement: dc161495supplementarydata.pdf [file dc161495supplementarydata.pdf]

## SUPPLEMENTARY DATA

### Supplementary Figure 1. Trial design

FPG, fasting plasma glucose; iGlar, insulin glargine; iGlarLixi, fixed-ratio combination of insulin glargine and lixisenatide; OAD, oral antidiabetic drug; R, randomization; SMPG, self-monitored plasma glucose

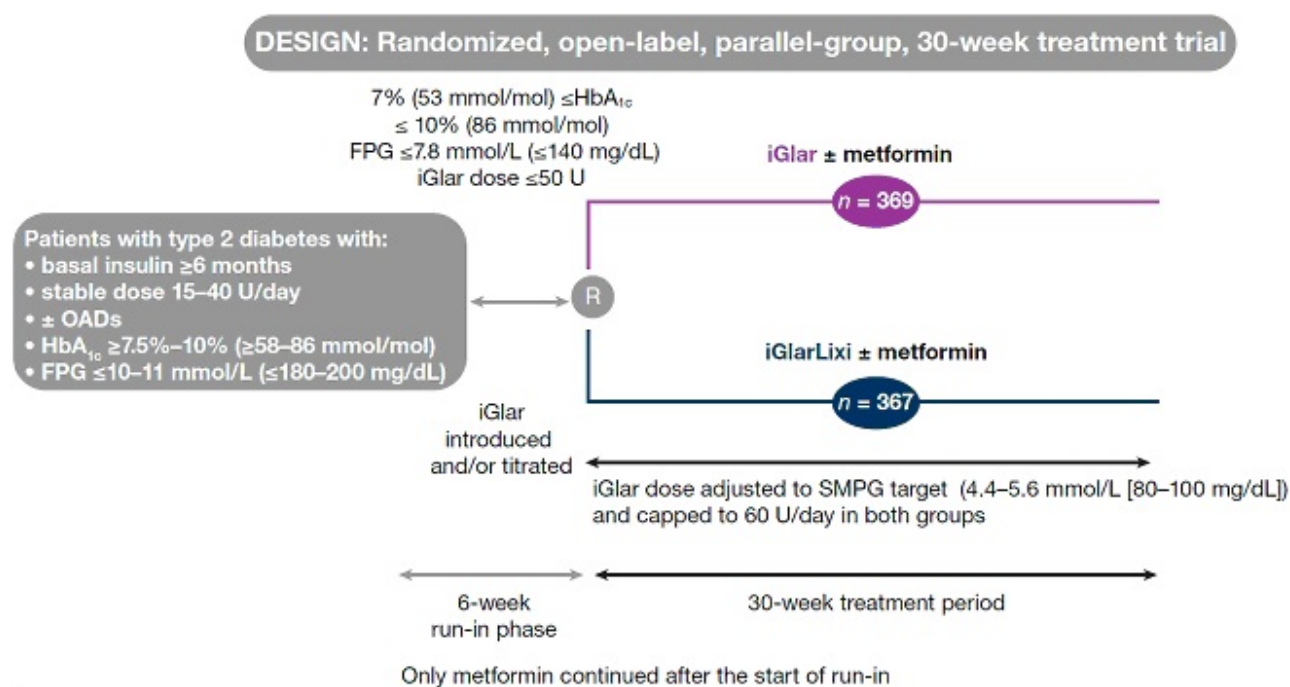

## SUPPLEMENTARY DATA

### Supplementary Figure 2. Patient disposition

The mITT population included 731 patients. One patient in the iGlarLixi group and four in the iGlar group were excluded because they did not have any post-baseline efficacy data. The safety population included 730 patients as six patients were randomized but not treated (five patients were randomized by mistake and one patient withdrew informed consent).

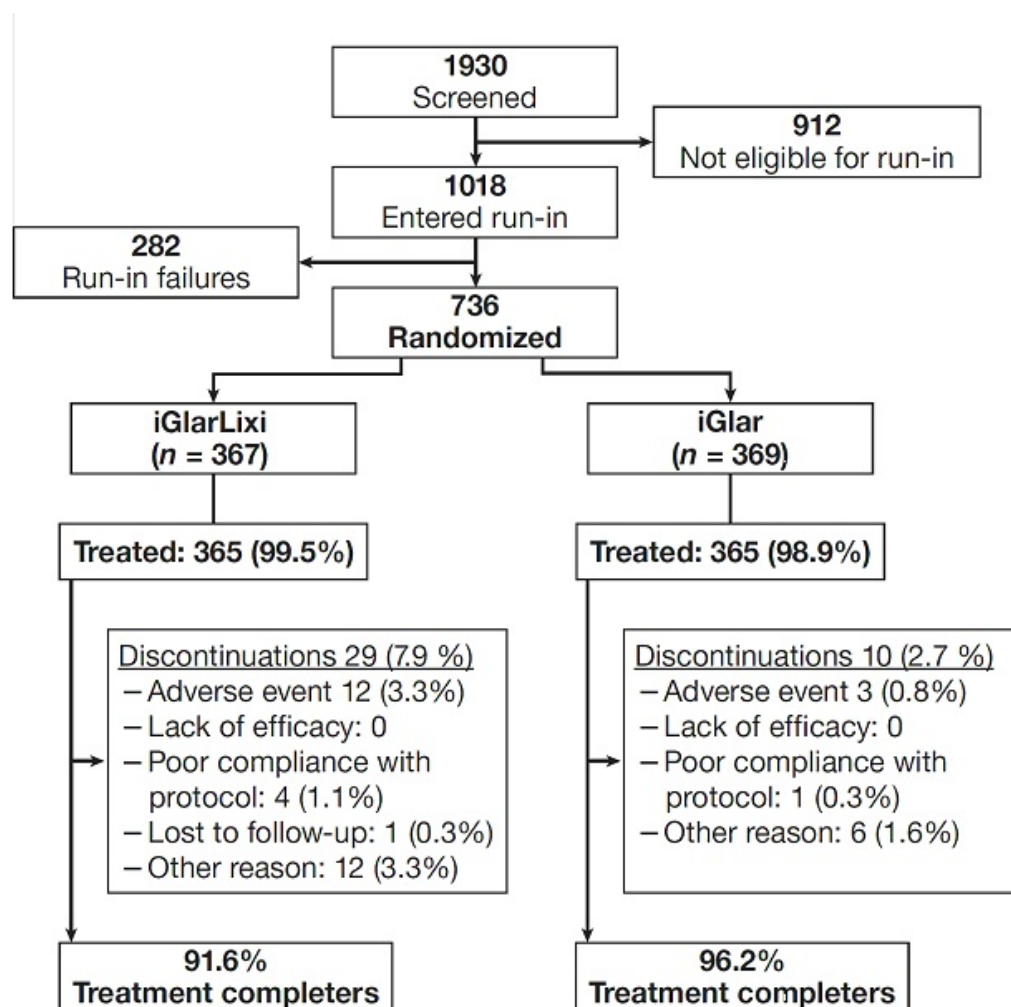

# SUPPLEMENTARY DATA

**Supplementary Table 1.** Response to therapy in mg/dL

| Efficacy End Point                             | iGlarLixi<br><i>n</i> = 366 | iGlar<br><i>n</i> = 365 |
|------------------------------------------------|-----------------------------|-------------------------|
| 2-hour plasma glucose excursion, mg/dL         |                             |                         |
| Baseline                                       | 126 ± 63                    | 129 ± 56                |
| Week 30 (LOCF)                                 | 56 ± 64                     | 121 ± 60                |
| LS mean ± SE change from baseline <sup>†</sup> | −70 ± 5                     | −8 ± 5                  |
| LS mean ± SE difference vs iGlar <sup>‡</sup>  | −62 ± 5                     | —                       |
| 95% CI                                         | −71, −53                    | —                       |
| <i>P</i> value                                 | <0.0001                     | —                       |
| 2-hour PPG, mg/dL                              |                             |                         |
| Baseline                                       | 268 ± 69                    | 270 ± 66                |
| Week 30 (LOCF)                                 | 179 ± 70                    | 242 ± 69                |
| LS mean ± SE change from baseline <sup>†</sup> | −85 ± 6                     | −25 ± 6                 |
| LS mean ± SE difference vs iGlar <sup>‡</sup>  | −60 ± 5                     | —                       |
| 95% CI                                         | −70, −50                    | —                       |
| FPG, mg/dL                                     |                             |                         |
| Baseline,                                      | 132 ± 35                    | 132 ± 37                |
| Week 30                                        | 122 ± 41                    | 120 ± 37                |
| LS mean ± SE change from baseline*             | −6 ± 3                      | −8 ± 2                  |
| LS mean ± SE difference vs iGlar*              | 2 ± 3                       | —                       |
| 95% CI                                         | −4, 8                       | —                       |
| <i>P</i> value                                 | 0.495                       | —                       |
| 7-point SMPG, mg/dL                            |                             |                         |
| Baseline                                       | 166 ± 28                    | 163 ± 29                |
| Week 30                                        | 140 ± 31                    | 155 ± 31                |
| LS mean ± SE change from baseline*             | −27 ± 2                     | −11 ± 2                 |
| LS mean ± SE difference vs iGlar*              | −16 ± 2                     | —                       |
| 95% CI                                         | −21, −12                    | —                       |
| <i>P</i> value                                 | <0.0001                     | —                       |

Data are presented as mean ± SD or as indicated. \*Mixed-effect model with repeated measures.

<sup>†</sup>Cochran–Mantel–Haenszel method. <sup>‡</sup>Analysis of covariance model. 2-hour plasma glucose excursion = 2-hour PPG – PG 30 minutes prior to the meal and before IMP injection (only at week 30).

FPG, fasting plasma glucose; iGlarLixi, titratable fixed-ratio combination iGlar:lixisenatide; iGlar, insulin glargine; LOCF, last observation carried forward; LS, least squares; PPG, postprandial plasma glucose; SE, standard error; SMPG, self-measured plasma glucose.

**LIST OF PRINCIPAL INVESTIGATOR(S) AND SUB-INVESTIGATOR(S) PER STUDY SITE  
WHERE PATIENTS WERE ENROLLED**

QSD-002219

|                      |                |                    |          |
|----------------------|----------------|--------------------|----------|
| <b>Product Code:</b> | HOE901/AVE0010 | <b>Study Code:</b> | EFC12405 |
|----------------------|----------------|--------------------|----------|

**List of Principal Investigator(s) and Sub-Investigator(s) per study site where patients were enrolled**

| Study Center No. | Investigator last name and first name* | Role in the Investigation        | Professional Degree(s) | Institutional Affiliation(s)                                                                                                                 |
|------------------|----------------------------------------|----------------------------------|------------------------|----------------------------------------------------------------------------------------------------------------------------------------------|
| 036501           | Neoh Sandraf                           | Sub-Investigator/Co-Investigator | MBBS                   | Heidelberg Repatriation Hospital<br>Department of Medicine<br>Building 24, 300 Waterdale Road<br>Heidelberg<br>3081<br>Victoria<br>AUSTRALIA |
| 036501           | Proietto Joseph                        | Principal Investigator           | FRCP,MD                | Heidelberg Repatriation Hospital<br>Department of Medicine<br>Building 24, 300 Waterdale Road<br>Heidelberg<br>3081<br>Victoria<br>AUSTRALIA |

\*CV provided as attachment to this appendix for all principal investigators

*Ensure that the printed copy of this document is the current version available on the Intranet.*

Property of the Sanofi Group - strictly confidential

**Version Number: 4.0**

**28-JUL-2015**

# SUPPLEMENTARY DATA

LIST OF PRINCIPAL INVESTIGATOR(S) AND SUB-INVESTIGATOR(S) PER STUDY SITE WHERE PATIENTS WERE ENROLLED

QSD-002219

Page 2 of 218

|                      |                |                    |          |
|----------------------|----------------|--------------------|----------|
| <b>Product Code:</b> | HOE901/AVE0010 | <b>Study Code:</b> | EFC12405 |
|----------------------|----------------|--------------------|----------|

| Study Center No. | Investigator last name and first name* | Role in the Investigation        | Professional Degree(s) | Institutional Affiliation(s)                                                                                                                 |
|------------------|----------------------------------------|----------------------------------|------------------------|----------------------------------------------------------------------------------------------------------------------------------------------|
| 036501           | Sumithran Kalpana Priyadarsini         | Sub-Investigator/Co-Investigator | MBBS                   | Heidelberg Repatriation Hospital<br>Department of Medicine<br>Building 24, 300 Waterdale Road<br>Heidelberg<br>3081<br>Victoria<br>AUSTRALIA |
| 036501           | Tint Aye                               | Sub-Investigator/Co-Investigator | MBBS, FRACP            | Heidelberg Repatriation Hospital<br>Department of Medicine<br>Building 24, 300 Waterdale Road<br>Heidelberg<br>3081<br>Victoria<br>AUSTRALIA |
| 036504           | Colman Peter                           | Sub-Investigator/Co-Investigator | MBBS                   | Royal Melbourne Hospital<br>300 Gratten Street<br>Parkville VIC 3050<br>AUSTRALIA                                                            |
| 036504           | Fourlanos Spiros                       | Sub-Investigator/Co-Investigator | MBBS                   | Royal Melbourne Hospital<br>300 Gratten Street<br>Parkville VIC 3050<br>AUSTRALIA                                                            |
| 036504           | <a href="#">Nankervis Alison</a>       | Principal Investigator           | MBBS                   | Royal Melbourne Hospital<br>300 Gratten Street<br>Parkville VIC 3050<br>AUSTRALIA                                                            |

\*CV provided as attachment to this appendix for all principal investigators

*Ensure that the printed copy of this document is the current version available on the Intranet.*

Property of the Sanofi Group - strictly confidential

Version Number: 4.0

28-JUL-2015

# SUPPLEMENTARY DATA

LIST OF PRINCIPAL INVESTIGATOR(S) AND SUB-INVESTIGATOR(S) PER STUDY SITE WHERE PATIENTS WERE ENROLLED

QSD-002219

Page 3 of 218

|                      |                |                    |          |
|----------------------|----------------|--------------------|----------|
| <b>Product Code:</b> | HOE901/AVE0010 | <b>Study Code:</b> | EFC12405 |
|----------------------|----------------|--------------------|----------|

| Study Center No. | Investigator last name and first name* | Role in the Investigation        | Professional Degree(s) | Institutional Affiliation(s)                                                                                                     |
|------------------|----------------------------------------|----------------------------------|------------------------|----------------------------------------------------------------------------------------------------------------------------------|
| 036505           | Gilfillan Christopher                  | Sub-Investigator/Co-Investigator | MBBS                   | Box Hill Diabetes and Endocrine Service -<br>Simptron Pty Ltd<br>Suite 33/50 Nelson Road<br>Box Hill<br>VIC<br>3128<br>AUSTRALIA |
| 036505           | Simpson Richard                        | Principal Investigator           | MBBS                   | Box Hill Diabetes and Endocrine Service -<br>Simptron Pty Ltd<br>Suite 33/50 Nelson Road<br>Box Hill<br>VIC<br>3128<br>AUSTRALIA |
| 124501           | Elliott Thomas                         | Principal Investigator           | MRCP                   | BC Diabetes<br>400-210 West Broadway<br>Vancouver BC<br>V5Y 3W2<br>CANADA                                                        |
| 124501           | Paty Breay                             | Sub-Investigator/Co-Investigator | MD                     | BC Diabetes<br>400-210 West Broadway<br>Vancouver BC<br>V5Y 3W2<br>CANADA                                                        |

\*CV provided as attachment to this appendix for all principal investigators

*Ensure that the printed copy of this document is the current version available on the Intranet.*

Property of the Sanofi Group - strictly confidential

Version Number: 4.0

28-JUL-2015

# SUPPLEMENTARY DATA

LIST OF PRINCIPAL INVESTIGATOR(S) AND SUB-INVESTIGATOR(S) PER STUDY SITE WHERE PATIENTS WERE ENROLLED

QSD-002219

Page 4 of 218

|                      |                |                    |          |
|----------------------|----------------|--------------------|----------|
| <b>Product Code:</b> | HOE901/AVE0010 | <b>Study Code:</b> | EFC12405 |
|----------------------|----------------|--------------------|----------|

| Study Center No. | Investigator last name and first name* | Role in the Investigation        | Professional Degree(s) | Institutional Affiliation(s)                                                               |
|------------------|----------------------------------------|----------------------------------|------------------------|--------------------------------------------------------------------------------------------|
| 124502           | Friars Douglas                         | Principal Investigator           | MD                     | Dawson Road Family Health Team<br>83 Dawson Road<br>Guelph<br>N1H 1B1<br>Ontario<br>CANADA |
| 124502           | Gibson Malcolm                         | Sub-Investigator/Co-Investigator | MD                     | Dawson Road Family Health Team<br>83 Sawson Road<br>Guelph<br>N1H 1B1<br>Ontario<br>CANADA |
| 124502           | Tobin Tom                              | Sub-Investigator/Co-Investigator | MD                     | Dawson Road Family Health Team<br>83 Sawson Road<br>Guelph<br>N1H 1B1<br>Ontario<br>CANADA |
| 124502           | Turvey Erin                            | Sub-Investigator/Co-Investigator | MD                     | Dawson Road Family Health Team<br>83 Sawson Road<br>Guelph<br>N1H 1B1<br>Ontario<br>CANADA |

\*CV provided as attachment to this appendix for all principal investigators

*Ensure that the printed copy of this document is the current version available on the Intranet.*

Property of the Sanofi Group - strictly confidential

Version Number: 4.0

28-JUL-2015

# SUPPLEMENTARY DATA

LIST OF PRINCIPAL INVESTIGATOR(S) AND SUB-INVESTIGATOR(S) PER STUDY SITE WHERE PATIENTS WERE ENROLLED

QSD-002219

Page 5 of 218

|                      |                |                    |          |
|----------------------|----------------|--------------------|----------|
| <b>Product Code:</b> | HOE901/AVE0010 | <b>Study Code:</b> | EFC12405 |
|----------------------|----------------|--------------------|----------|

| Study Center No. | Investigator last name and first name* | Role in the Investigation        | Professional Degree(s) | Institutional Affiliation(s)                                                                                                |
|------------------|----------------------------------------|----------------------------------|------------------------|-----------------------------------------------------------------------------------------------------------------------------|
| 124502           | Wallace Garry                          | Sub-Investigator/Co-Investigator | MD                     | Dawson Road Family Health Team<br>83 Sawson Road<br>Guelph<br>N1H 1B1<br>Ontario<br>CANADA                                  |
| 124503           | Batra Sachin                           | Sub-Investigator/Co-Investigator | MD                     | Dr. Anil K. Gupta Medicine Professional Corporation<br>1620 Albion Road Unit 106<br>Toronto<br>M9V 4B4<br>Ontario<br>CANADA |
| 124503           | Gupta Anil                             | Principal Investigator           | MD                     | Dr. Anil K. Gupta Medicine Professional Corporation<br>1620 Albion Road Unit 106<br>Toronto<br>M9V 4B4<br>Ontario<br>CANADA |

\*CV provided as attachment to this appendix for all principal investigators

*Ensure that the printed copy of this document is the current version available on the Intranet.*

Property of the Sanofi Group - strictly confidential

Version Number: 4.0

28-JUL-2015



# SUPPLEMENTARY DATA

LIST OF PRINCIPAL INVESTIGATOR(S) AND SUB-INVESTIGATOR(S) PER STUDY SITE WHERE PATIENTS WERE ENROLLED

QSD-002219

Page 6 of 218

|                      |                |                    |          |
|----------------------|----------------|--------------------|----------|
| <b>Product Code:</b> | HOE901/AVE0010 | <b>Study Code:</b> | EFC12405 |
|----------------------|----------------|--------------------|----------|

| Study Center No. | Investigator last name and first name* | Role in the Investigation        | Professional Degree(s) | Institutional Affiliation(s)                                                                                                |
|------------------|----------------------------------------|----------------------------------|------------------------|-----------------------------------------------------------------------------------------------------------------------------|
| 124503           | Kohli Suparna                          | Sub-Investigator/Co-Investigator | MD                     | Dr. Anil K. Gupta Medicine Professional Corporation<br>1620 Albion Road Unit 106<br>Toronto<br>M9V 4B4<br>Ontario<br>CANADA |
| 124503           | Price David                            | Sub-Investigator/Co-Investigator | MD                     | Dr. Anil K. Gupta Medicine Professional Corporation<br>1620 Albion Road Unit 106<br>Toronto<br>M9V 4B4<br>Ontario<br>CANADA |
| 124504           | Depetrillo Santino                     | Sub-Investigator/Co-Investigator | MD                     | Beamsville Medical Centre<br>4279 Hixon Street<br>Beamsville<br>L0R 1B0<br>Ontario<br>CANADA                                |
| 124504           | Friars Douglas                         | Sub-Investigator/Co-Investigator | MD                     | Beamsville Medical Centre<br>4279 Hixon Street<br>Beamsville<br>L0R 1B0<br>Ontario<br>CANADA                                |

\*CV provided as attachment to this appendix for all principal investigators

*Ensure that the printed copy of this document is the current version available on the Intranet.*

Property of the Sanofi Group - strictly confidential

Version Number: 4.0

28-JUL-2015

# SUPPLEMENTARY DATA

LIST OF PRINCIPAL INVESTIGATOR(S) AND SUB-INVESTIGATOR(S) PER STUDY SITE WHERE PATIENTS WERE ENROLLED

QSD-002219

Page 7 of 218

|                      |                |                    |          |
|----------------------|----------------|--------------------|----------|
| <b>Product Code:</b> | HOE901/AVE0010 | <b>Study Code:</b> | EFC12405 |
|----------------------|----------------|--------------------|----------|

| Study Center No. | Investigator last name and first name* | Role in the Investigation        | Professional Degree(s) | Institutional Affiliation(s)                                                                                               |
|------------------|----------------------------------------|----------------------------------|------------------------|----------------------------------------------------------------------------------------------------------------------------|
| 124504           | Green Kevin                            | Sub-Investigator/Co-Investigator | MD                     | Beamsville Medical Centre<br>4279 Hixon Street<br>Beamsville<br>L0R 1B0<br>Ontario<br>CANADA                               |
| 124504           | Morrison Douglas                       | Principal Investigator           | MD                     | Beamsville Medical Centre<br>4279 Hixon Street<br>Beamsville<br>L0R 1B0<br>Ontario<br>CANADA                               |
| 124505           | Mircescu Hortensia                     | Sub-Investigator/Co-Investigator | MD                     | Institut De Recherches Cliniques De Montréal (IRCM)<br>110 Des Pins Avenue West<br>Montreal<br>H1W 2R7<br>Quebec<br>CANADA |
| 124505           | Rabasa-Lhoret Remi                     | Principal Investigator           | MD,PhD                 | Institut De Recherches Cliniques De Montréal (IRCM)<br>110 Des Pins Avenue West<br>Montreal<br>H1W 2R7<br>Quebec<br>CANADA |

\*CV provided as attachment to this appendix for all principal investigators

*Ensure that the printed copy of this document is the current version available on the Intranet.*

Property of the Sanofi Group - strictly confidential

Version Number: 4.0

28-JUL-2015

# SUPPLEMENTARY DATA

LIST OF PRINCIPAL INVESTIGATOR(S) AND SUB-INVESTIGATOR(S) PER STUDY SITE WHERE PATIENTS WERE ENROLLED

QSD-002219

Page 8 of 218

|                      |                |                    |          |
|----------------------|----------------|--------------------|----------|
| <b>Product Code:</b> | HOE901/AVE0010 | <b>Study Code:</b> | EFC12405 |
|----------------------|----------------|--------------------|----------|

| Study Center No. | Investigator last name and first name* | Role in the Investigation        | Professional Degree(s) | Institutional Affiliation(s)                                                                               |
|------------------|----------------------------------------|----------------------------------|------------------------|------------------------------------------------------------------------------------------------------------|
| 124507           | Evans Janet                            | Sub-Investigator/Co-Investigator | MD                     | Okanagan Clinical Trials Ltd.<br>204-1353 Ellis Street<br>Kelowna<br>V1Y 1Z9<br>British Columbia<br>CANADA |
| 124507           | Godsell Sally                          | Principal Investigator           | MD                     | Okanagan Clinical Trials Ltd.<br>204-1353 Ellis Street<br>Kelowna<br>V1Y 1Z9<br>British Columbia<br>CANADA |
| 124507           | Pagdin Grant                           | Sub-Investigator/Co-Investigator | MD                     | Okanagan Clinical Trials Ltd.<br>204-1353 Ellis Street<br>Kelowna<br>V1Y 1Z9<br>British Columbia<br>CANADA |
| 124508           | Cox James                              | Sub-Investigator/Co-Investigator | MD                     | Cook Street Medical Clinic<br>107, 1175 Cook Street<br>Victoria<br>V8V 4A1<br>British Columbia<br>CANADA   |

\*CV provided as attachment to this appendix for all principal investigators

*Ensure that the printed copy of this document is the current version available on the Intranet.*

Property of the Sanofi Group - strictly confidential

Version Number: 4.0

28-JUL-2015

# SUPPLEMENTARY DATA

LIST OF PRINCIPAL INVESTIGATOR(S) AND SUB-INVESTIGATOR(S) PER STUDY SITE WHERE PATIENTS WERE ENROLLED

QSD-002219

Page 9 of 218

|                      |                |                    |          |
|----------------------|----------------|--------------------|----------|
| <b>Product Code:</b> | HOE901/AVE0010 | <b>Study Code:</b> | EFC12405 |
|----------------------|----------------|--------------------|----------|

| Study Center No. | Investigator last name and first name* | Role in the Investigation        | Professional Degree(s) | Institutional Affiliation(s)                                                                                            |
|------------------|----------------------------------------|----------------------------------|------------------------|-------------------------------------------------------------------------------------------------------------------------|
| 124508           | Jones Michael                          | Principal Investigator           | MD                     | Cook Street Medical Clinic<br>107, 1175 Cook Street<br>Victoria<br>V8V 4A1<br>British Columbia<br>CANADA                |
| 124508           | Luco Gerald                            | Sub-Investigator/Co-Investigator | MD                     | Cook Street Medical Clinic<br>107, 1175 Cook Street<br>Victoria<br>V8V 4A1<br>British Columbia<br>CANADA                |
| 124509           | Blouin François                        | Principal Investigator           | MD                     | Pro-Recherche<br>Polyclinique des Ponts<br>120 - 1110 Boul. De La Rive-Sud<br>St-Romuald<br>G6W 5M6<br>Quebec<br>CANADA |
| 124509           | Vallieres Gerald                       | Sub-Investigator/Co-Investigator | MD                     | Pro-Recherche<br>Polyclinique des Ponts<br>120 - 1110 Boul. De La Rive-Sud<br>St-Romuald<br>G6W 5M6<br>Quebec<br>CANADA |

\*CV provided as attachment to this appendix for all principal investigators

*Ensure that the printed copy of this document is the current version available on the Intranet.*

Property of the Sanofi Group - strictly confidential

Version Number: 4.0

28-JUL-2015

# SUPPLEMENTARY DATA

LIST OF PRINCIPAL INVESTIGATOR(S) AND SUB-INVESTIGATOR(S) PER STUDY SITE WHERE PATIENTS WERE ENROLLED

QSD-002219

Page 10 of 218

|                      |                |                    |          |
|----------------------|----------------|--------------------|----------|
| <b>Product Code:</b> | HOE901/AVE0010 | <b>Study Code:</b> | EFC12405 |
|----------------------|----------------|--------------------|----------|

| Study Center No. | Investigator last name and first name* | Role in the Investigation        | Professional Degree(s) | Institutional Affiliation(s)                                                                                                                        |
|------------------|----------------------------------------|----------------------------------|------------------------|-----------------------------------------------------------------------------------------------------------------------------------------------------|
| 124510           | Finkelstein Sheldon                    | Sub-Investigator/Co-Investigator | MD                     | Manna Research<br>2291 Kipling Avenue, Unit 117b<br>Toronto<br>M9W 4L6<br>Ontario<br>CANADA                                                         |
| 124510           | Lasko Ben                              | Principal Investigator           | MD                     | Manna Research<br>2291 Kipling Avenue, Unit 117b<br>Toronto<br>M9W 4L6<br>Ontario<br>CANADA                                                         |
| 124510           | Toma Azhar                             | Principal Investigator           | MD                     | Manna Research<br>2291 Kipling Avenue, Unit 117b<br>Toronto<br>M9W 4L6<br>Ontario<br>CANADA                                                         |
| 124511           | Aronson Ronnie                         | Principal Investigator           | MD                     | Lifestyle Metabolism Centre<br>LMC Endocrinology Centers (Toronto) LTD<br>1929 Bayview Avenue, Suite 107<br>Toronto<br>M4G 3E8<br>Ontario<br>CANADA |

\*CV provided as attachment to this appendix for all principal investigators

*Ensure that the printed copy of this document is the current version available on the Intranet.*

Property of the Sanofi Group - strictly confidential

Version Number: 4.0

28-JUL-2015

# SUPPLEMENTARY DATA

LIST OF PRINCIPAL INVESTIGATOR(S) AND SUB-INVESTIGATOR(S) PER STUDY SITE WHERE PATIENTS WERE ENROLLED

QSD-002219

Page 11 of 218

|                      |                |                    |          |
|----------------------|----------------|--------------------|----------|
| <b>Product Code:</b> | HOE901/AVE0010 | <b>Study Code:</b> | EFC12405 |
|----------------------|----------------|--------------------|----------|

| Study Center No. | Investigator last name and first name* | Role in the Investigation        | Professional Degree(s) | Institutional Affiliation(s)                                                                                                                        |
|------------------|----------------------------------------|----------------------------------|------------------------|-----------------------------------------------------------------------------------------------------------------------------------------------------|
| 124511           | Boright Andrew                         | Sub-Investigator/Co-Investigator | MD                     | Lifestyle Metabolism Centre<br>LMC Endocrinology Centers (Toronto) LTD<br>1929 Bayview Avenue, Suite 107<br>Toronto<br>M4G 3E8<br>Ontario<br>CANADA |
| 124511           | Grossman Loren                         | Sub-Investigator/Co-Investigator | MD                     | Lifestyle Metabolism Centre<br>LMC Endocrinology Centers (Toronto) LTD<br>1929 Bayview Avenue, Suite 107<br>Toronto<br>M4G 3E8<br>Ontario<br>CANADA |
| 124511           | Narula Priya                           | Sub-Investigator/Co-Investigator | MD                     | Lifestyle Metabolism Centre<br>LMC Endocrinology Centers (Toronto) LTD<br>1929 Bayview Avenue, Suite 107<br>Toronto<br>M4G 3E8<br>Ontario<br>CANADA |

\*CV provided as attachment to this appendix for all principal investigators

*Ensure that the printed copy of this document is the current version available on the Intranet.*

Property of the Sanofi Group - strictly confidential

Version Number: 4.0

28-JUL-2015

# SUPPLEMENTARY DATA

LIST OF PRINCIPAL INVESTIGATOR(S) AND SUB-INVESTIGATOR(S) PER STUDY SITE WHERE PATIENTS WERE ENROLLED

QSD-002219

Page 12 of 218

|                      |                |                    |          |
|----------------------|----------------|--------------------|----------|
| <b>Product Code:</b> | HOE901/AVE0010 | <b>Study Code:</b> | EFC12405 |
|----------------------|----------------|--------------------|----------|

| Study Center No. | Investigator last name and first name* | Role in the Investigation        | Professional Degree(s) | Institutional Affiliation(s)                                                                                                                        |
|------------------|----------------------------------------|----------------------------------|------------------------|-----------------------------------------------------------------------------------------------------------------------------------------------------|
| 124511           | Sandler Samantha                       | Sub-Investigator/Co-Investigator | MD                     | Lifestyle Metabolism Centre<br>LMC Endocrinology Centers (Toronto) LTD<br>1929 Bayview Avenue, Suite 107<br>Toronto<br>M4G 3E8<br>Ontario<br>CANADA |
| 124511           | Steen Oren                             | Sub-Investigator/Co-Investigator | MD                     | Lifestyle Metabolism Centre<br>LMC Endocrinology Centers (Toronto) LTD<br>1929 Bayview Avenue, Suite 107<br>Toronto<br>M4G 3E8<br>Ontario<br>CANADA |
| 124511           | Telner Adam                            | Sub-Investigator/Co-Investigator | MD                     | Lifestyle Metabolism Centre<br>LMC Endocrinology Centers (Toronto) LTD<br>1929 Bayview Avenue, Suite 107<br>Toronto<br>M4G 3E8<br>Ontario<br>CANADA |

\*CV provided as attachment to this appendix for all principal investigators

*Ensure that the printed copy of this document is the current version available on the Intranet.*

Property of the Sanofi Group - strictly confidential

Version Number: 4.0

28-JUL-2015

# SUPPLEMENTARY DATA

LIST OF PRINCIPAL INVESTIGATOR(S) AND SUB-INVESTIGATOR(S) PER STUDY SITE WHERE PATIENTS WERE ENROLLED

QSD-002219

Page 13 of 218

|                      |                |                    |          |
|----------------------|----------------|--------------------|----------|
| <b>Product Code:</b> | HOE901/AVE0010 | <b>Study Code:</b> | EFC12405 |
|----------------------|----------------|--------------------|----------|

| Study Center No. | Investigator last name and first name* | Role in the Investigation        | Professional Degree(s) | Institutional Affiliation(s)                                                                             |
|------------------|----------------------------------------|----------------------------------|------------------------|----------------------------------------------------------------------------------------------------------|
| 124512           | Bajaj Harpreet                         | Principal Investigator           | MPH, MB                | LMC Endocrinology Centres<br>2130 North Park Drive, Site 238<br>Brampton<br>L6S 0C9<br>Ontario<br>CANADA |
| 124512           | Chandra Prakash                        | Sub-Investigator/Co-Investigator | MD                     | LMC Endocrinology Centres<br>2130 North Park Drive, Site 238<br>Brampton<br>L6S 0C9<br>Ontario<br>CANADA |
| 124512           | Gupta Nikhil                           | Sub-Investigator/Co-Investigator | MD                     | LMC Endocrinology Centres<br>2130 North Park Drive, Site 238<br>Brampton<br>L6S 0C9<br>Ontario<br>CANADA |
| 124512           | Wadehra Davinder                       | Sub-Investigator/Co-Investigator | MD                     | LMC Endocrinology Centres<br>2130 North Park Drive, Site 238<br>Brampton<br>L6S 0C9<br>Ontario<br>CANADA |

\*CV provided as attachment to this appendix for all principal investigators

*Ensure that the printed copy of this document is the current version available on the Intranet.*

Property of the Sanofi Group - strictly confidential

Version Number: 4.0

28-JUL-2015



# SUPPLEMENTARY DATA

LIST OF PRINCIPAL INVESTIGATOR(S) AND SUB-INVESTIGATOR(S) PER STUDY SITE WHERE PATIENTS WERE ENROLLED

QSD-002219

Page 14 of 218

|                      |                |                    |          |
|----------------------|----------------|--------------------|----------|
| <b>Product Code:</b> | HOE901/AVE0010 | <b>Study Code:</b> | EFC12405 |
|----------------------|----------------|--------------------|----------|

| Study Center No. | Investigator last name and first name* | Role in the Investigation        | Professional Degree(s) | Institutional Affiliation(s)                                                                                                              |
|------------------|----------------------------------------|----------------------------------|------------------------|-------------------------------------------------------------------------------------------------------------------------------------------|
| 152501           | Godoy Gonzalo                          | Principal Investigator           | MD                     | Servicios Medicos Godoy Ltda<br>Avenida Salvador 95, oficina 807-810. Providencia<br>Santiago<br>7500710<br>Region Metropolitana<br>CHILE |
| 152502           | Aguirre Loreto                         | Principal Investigator           | MD                     | Adich<br>Quebec 496<br>Santiago<br>7500347<br>Región Metropolitana<br>CHILE                                                               |
| 152502           | Solis Carmen                           | Sub-Investigator/Co-Investigator | MD                     | Adich<br>Quebec 496<br>Santiago<br>7500347<br>Región Metropolitana<br>CHILE                                                               |
| 152503           | Macias Eddie                           | Sub-Investigator/Co-Investigator | MD                     | Hospital y CRS El Pino<br>Camino Padre Hurtado 13560<br>Santiago<br>8053095<br>RM Region Metropolitan<br>CHILE                            |

\*CV provided as attachment to this appendix for all principal investigators

*Ensure that the printed copy of this document is the current version available on the Intranet.*

Property of the Sanofi Group - strictly confidential

Version Number: 4.0

28-JUL-2015

# SUPPLEMENTARY DATA

LIST OF PRINCIPAL INVESTIGATOR(S) AND SUB-INVESTIGATOR(S) PER STUDY SITE WHERE PATIENTS WERE ENROLLED

QSD-002219

Page 15 of 218

|               |                |             |          |
|---------------|----------------|-------------|----------|
| Product Code: | HOE901/AVE0010 | Study Code: | EFC12405 |
|---------------|----------------|-------------|----------|

| Study Center No. | Investigator last name and first name* | Role in the Investigation        | Professional Degree(s) | Institutional Affiliation(s)                                                                                                |
|------------------|----------------------------------------|----------------------------------|------------------------|-----------------------------------------------------------------------------------------------------------------------------|
| 152503           | Palma Juan Carlos                      | Principal Investigator           | MD                     | Hospital y CRS El Pino<br>Camino Padre Hurtado 13560<br>Santiago<br>8053095<br>RM Region Metropolitan<br>CHILE              |
| 152504           | Farias Carmen                          | Sub-Investigator/Co-Investigator | MD                     | Hospital Naval Almirante Nef<br>Subida Alessandri S / N°.<br>Vina Del Mar<br>V Region de Valparaiso<br>CHILE                |
| 152504           | Garrido Berta                          | Principal Investigator           | MD                     | Hospital Naval Almirante Nef<br>Subida Alessandri S / N°.<br>Vina Del Mar<br>V Region de Valparaiso<br>CHILE                |
| 152507           | Angulo Jorge                           | Principal Investigator           | MD                     | Centro de Estudios Barros Luco<br>Ramon subercaseaux 1268 of. 804<br>Santiago<br>8910131<br>RM Region Metropolitan<br>CHILE |

\*CV provided as attachment to this appendix for all principal investigators

*Ensure that the printed copy of this document is the current version available on the Intranet.*

Property of the Sanofi Group - strictly confidential

Version Number: 4.0

28-JUL-2015

# SUPPLEMENTARY DATA

LIST OF PRINCIPAL INVESTIGATOR(S) AND SUB-INVESTIGATOR(S) PER STUDY SITE WHERE PATIENTS WERE ENROLLED

QSD-002219

Page 16 of 218

|               |                |             |          |
|---------------|----------------|-------------|----------|
| Product Code: | HOE901/AVE0010 | Study Code: | EFC12405 |
|---------------|----------------|-------------|----------|

| Study Center No. | Investigator last name and first name* | Role in the Investigation        | Professional Degree(s) | Institutional Affiliation(s)                                                                                                |
|------------------|----------------------------------------|----------------------------------|------------------------|-----------------------------------------------------------------------------------------------------------------------------|
| 152507           | González Guillermo                     | Sub-Investigator/Co-Investigator | MD                     | Centro de Estudios Barros Luco<br>Ramon subercaseaux 1268 of. 804<br>Santiago<br>8910131<br>RM Region Metropolitan<br>CHILE |
| 152507           | Medina Marcelo                         | Principal Investigator           | MD                     | Centro de Estudios Barros Luco<br>Ramon subercaseaux 1268 of. 804<br>Santiago<br>8910131<br>RM Region Metropolitan<br>CHILE |
| 152509           | Garcia Siomara                         | Sub-Investigator/Co-Investigator | MD                     | hospital de talagante<br>Balmaceda 1458<br>Talagante<br>9670468<br>RM Region Metropolitan<br>CHILE                          |
| 152509           | Marrero Juan                           | Principal Investigator           | MD                     | hospital de talagante<br>Balmaceda 1458<br>Talagante<br>9670468<br>RM Region Metropolitan<br>CHILE                          |

\*CV provided as attachment to this appendix for all principal investigators

*Ensure that the printed copy of this document is the current version available on the Intranet.*

Property of the Sanofi Group - strictly confidential

Version Number: 4.0

28-JUL-2015

# SUPPLEMENTARY DATA

LIST OF PRINCIPAL INVESTIGATOR(S) AND SUB-INVESTIGATOR(S) PER STUDY SITE WHERE PATIENTS WERE ENROLLED

QSD-002219

Page 17 of 218

|                      |                |                    |          |
|----------------------|----------------|--------------------|----------|
| <b>Product Code:</b> | HOE901/AVE0010 | <b>Study Code:</b> | EFC12405 |
|----------------------|----------------|--------------------|----------|

| Study Center No. | Investigator last name and first name* | Role in the Investigation        | Professional Degree(s) | Institutional Affiliation(s)                                                                                             |
|------------------|----------------------------------------|----------------------------------|------------------------|--------------------------------------------------------------------------------------------------------------------------|
| 152509           | Trujillo Fernando                      | Sub-Investigator/Co-Investigator | MD                     | hospital de talagante<br>Balmaceda 1458<br>Talagante<br>9670468<br>RM Region Metropolitan<br>CHILE                       |
| 152511           | Tenorio María                          | Sub-Investigator/Co-Investigator | MD                     | Quantum Research<br>Dr. Otto Bader 810<br>Puerto Varas<br>5550170<br>X Region los Lagos<br>CHILE                         |
| 152511           | Torres Claudia                         | Principal Investigator           | MD                     | Quantum Research<br>Dr. Otto Bader 810<br>Puerto Varas<br>5550170<br>X Region los Lagos<br>CHILE                         |
| 152513           | Danin Alfredo                          | Principal Investigator           | MD                     | Centro de Investigacion Clinica del Sur<br>Diego Portales 287<br>Temuco<br>IX Region de la Araucanía<br>4781156<br>CHILE |

\*CV provided as attachment to this appendix for all principal investigators

*Ensure that the printed copy of this document is the current version available on the Intranet.*

Property of the Sanofi Group - strictly confidential

Version Number: 4.0

28-JUL-2015

# SUPPLEMENTARY DATA

LIST OF PRINCIPAL INVESTIGATOR(S) AND SUB-INVESTIGATOR(S) PER STUDY SITE WHERE PATIENTS WERE ENROLLED

QSD-002219

Page 18 of 218

|                      |                |                    |          |
|----------------------|----------------|--------------------|----------|
| <b>Product Code:</b> | HOE901/AVE0010 | <b>Study Code:</b> | EFC12405 |
|----------------------|----------------|--------------------|----------|

| Study Center No. | Investigator last name and first name* | Role in the Investigation        | Professional Degree(s) | Institutional Affiliation(s)                                                                                             |
|------------------|----------------------------------------|----------------------------------|------------------------|--------------------------------------------------------------------------------------------------------------------------|
| 152513           | Saavedra Sonia                         | Sub-Investigator/Co-Investigator | MD                     | Centro de Investigacion Clinica del Sur<br>Diego Portales 287<br>Temuco<br>IX Region de la Araucanía<br>4781156<br>CHILE |
| 152514           | Contreras Carmen                       | Sub-Investigator/Co-Investigator | MD                     | SMOLAN LTDA<br>Almirante Zegers 801, comuna Providencia,<br>Santiago<br>7500739<br>RM Region Metropolitan<br>CHILE       |
| 152514           | Vejar Margarita                        | Principal Investigator           | MD                     | SMOLAN LTDA<br>Almirante Zegers 801, comuna Providencia,<br>Santiago<br>7500739<br>RM Region Metropolitan<br>CHILE       |
| 203502           | Karasova Jaroslava                     | Principal Investigator           | MD                     | Interni a diabetologicka ambulance<br>Majova 19<br>Cheb<br>35002<br>CZECH REPUBLIC                                       |

\*CV provided as attachment to this appendix for all principal investigators

*Ensure that the printed copy of this document is the current version available on the Intranet.*

Property of the Sanofi Group - strictly confidential

Version Number: 4.0

28-JUL-2015

# SUPPLEMENTARY DATA

LIST OF PRINCIPAL INVESTIGATOR(S) AND SUB-INVESTIGATOR(S) PER STUDY SITE WHERE PATIENTS WERE ENROLLED

QSD-002219

Page 19 of 218

|                      |                |                    |          |
|----------------------|----------------|--------------------|----------|
| <b>Product Code:</b> | HOE901/AVE0010 | <b>Study Code:</b> | EFC12405 |
|----------------------|----------------|--------------------|----------|

| Study Center No. | Investigator last name and first name* | Role in the Investigation        | Professional Degree(s) | Institutional Affiliation(s)                                                              |
|------------------|----------------------------------------|----------------------------------|------------------------|-------------------------------------------------------------------------------------------|
| 203502           | Kufnerova Marketa                      | Sub-Investigator/Co-Investigator | MD                     | Interni a diabetologicka ambulance<br>Majova 19<br>Cheb<br>35002<br>CZECH REPUBLIC        |
| 203502           | Simkova Martina                        | Sub-Investigator/Co-Investigator | MD                     | Interni a diabetologicka ambulance<br>Majova 19<br>Cheb<br>35002<br>CZECH REPUBLIC        |
| 203503           | <a href="#">Rancova Anna</a>           | Principal Investigator           | MD                     | Interni a diabetologicka ambulance<br>Krapkova 5 Olomouc<br>77900<br>CZECH REPUBLIC       |
| 203503           | Vítovská Hana                          | Sub-Investigator/Co-Investigator | MD                     | Interni a diabetologicka ambulance<br>Krapkova 5 Olomouc<br>77900<br>CZECH REPUBLIC       |
| 203504           | Kutej Martin                           | Sub-Investigator/Co-Investigator | MD                     | Interni a diabetologicka ambulance<br>Na Naspech 78<br>Hranice<br>75301<br>CZECH REPUBLIC |

\*CV provided as attachment to this appendix for all principal investigators

*Ensure that the printed copy of this document is the current version available on the Intranet.*

Property of the Sanofi Group - strictly confidential

Version Number: 4.0

28-JUL-2015

# SUPPLEMENTARY DATA

LIST OF PRINCIPAL INVESTIGATOR(S) AND SUB-INVESTIGATOR(S) PER STUDY SITE WHERE PATIENTS WERE ENROLLED

QSD-002219

Page 20 of 218

|                      |                |                    |          |
|----------------------|----------------|--------------------|----------|
| <b>Product Code:</b> | HOE901/AVE0010 | <b>Study Code:</b> | EFC12405 |
|----------------------|----------------|--------------------|----------|

| Study Center No. | Investigator last name and first name* | Role in the Investigation        | Professional Degree(s) | Institutional Affiliation(s)                                                              |
|------------------|----------------------------------------|----------------------------------|------------------------|-------------------------------------------------------------------------------------------|
| 203504           | Kutejova Vlasta                        | Principal Investigator           | MD                     | Interni a diabetologicka ambulance<br>Na Naspech 78<br>Hranice<br>75301<br>CZECH REPUBLIC |
| 203505           | Vetesnikova Renata                     | Principal Investigator           | MD                     | Interni a diabetologicka ambulance<br>Travnicka 2<br>Prostejov<br>79601<br>CZECH REPUBLIC |
| 203505           | Vítovská Hana                          | Sub-Investigator/Co-Investigator | MD                     | Interni a diabetologicka ambulance<br>Travnicka 2<br>Prostejov<br>79601<br>CZECH REPUBLIC |
| 203506           | Horanska Petra                         | Sub-Investigator/Co-Investigator | MD                     | Diabetologicka ambulance<br>Klasterni 117/2<br>Liberec<br>460 01<br>CZECH REPUBLIC        |
| 203506           | Vodickova Renata                       | Principal Investigator           | MD                     | Diabetologicka ambulance<br>Klasterni 117/2<br>Liberec<br>460 01<br>CZECH REPUBLIC        |

\*CV provided as attachment to this appendix for all principal investigators

*Ensure that the printed copy of this document is the current version available on the Intranet.*

Property of the Sanofi Group - strictly confidential

Version Number: 4.0

28-JUL-2015

# SUPPLEMENTARY DATA

LIST OF PRINCIPAL INVESTIGATOR(S) AND SUB-INVESTIGATOR(S) PER STUDY SITE WHERE PATIENTS WERE ENROLLED

QSD-002219

Page 21 of 218

|                      |                |                    |          |
|----------------------|----------------|--------------------|----------|
| <b>Product Code:</b> | HOE901/AVE0010 | <b>Study Code:</b> | EFC12405 |
|----------------------|----------------|--------------------|----------|

| Study Center No. | Investigator last name and first name* | Role in the Investigation        | Professional Degree(s) | Institutional Affiliation(s)                                                                             |
|------------------|----------------------------------------|----------------------------------|------------------------|----------------------------------------------------------------------------------------------------------|
| 203507           | Edelsberger Tomas                      | Principal Investigator           | MD                     | Interni a diabetologicka ambulance<br>Ricni okruh 26<br>Krnov<br>79401<br>CZECH REPUBLIC                 |
| 203507           | Gajdos Peter                           | Sub-Investigator/Co-Investigator | MD                     | Interni a diabetologicka ambulance<br>Ricni okruh 26<br>Krnov<br>79401<br>CZECH REPUBLIC                 |
| 203508           | Jon Jiri                               | Sub-Investigator/Co-Investigator | Dr Med                 | Nemocnice Na Homolce<br>Diabetologicka ambulance<br>Roentgenova 2<br>Praha 5<br>150 00<br>CZECH REPUBLIC |
| 203508           | Jonova Barbora                         | Sub-Investigator/Co-Investigator | MD                     | Nemocnice Na Homolce<br>Diabetologicka ambulance<br>Roentgenova 2<br>Praha 5<br>150 00<br>CZECH REPUBLIC |

\*CV provided as attachment to this appendix for all principal investigators

*Ensure that the printed copy of this document is the current version available on the Intranet.*

Property of the Sanofi Group - strictly confidential

Version Number: 4.0

28-JUL-2015



# SUPPLEMENTARY DATA

LIST OF PRINCIPAL INVESTIGATOR(S) AND SUB-INVESTIGATOR(S) PER STUDY SITE WHERE PATIENTS WERE ENROLLED

QSD-002219

Page 22 of 218

|                      |                |                    |          |
|----------------------|----------------|--------------------|----------|
| <b>Product Code:</b> | HOE901/AVE0010 | <b>Study Code:</b> | EFC12405 |
|----------------------|----------------|--------------------|----------|

| Study Center No. | Investigator last name and first name* | Role in the Investigation        | Professional Degree(s) | Institutional Affiliation(s)                                                                             |
|------------------|----------------------------------------|----------------------------------|------------------------|----------------------------------------------------------------------------------------------------------|
| 203508           | Kufova Lucie                           | Principal Investigator           | MD                     | Nemocnice Na Homolce<br>Diabetologicka ambulance<br>Roentgenova 2<br>Praha 5<br>150 00<br>CZECH REPUBLIC |
| 203509           | Gamova Andrea                          | Principal Investigator           | MD                     | ResTrial s.r.o., Poliklinika Mazurska<br>Mazurska 484/2<br>Praha 8<br>18100<br>CZECH REPUBLIC            |
| 203509           | Gamova Andrea                          | Sub-Investigator/Co-Investigator | MD                     | ResTrial s.r.o., Poliklinika Mazurska<br>Mazurska 484/2<br>Praha 8<br>18100<br>CZECH REPUBLIC            |
| 203509           | Horanska Petra                         | Principal Investigator           | MD                     | ResTrial s.r.o., Poliklinika Mazurska<br>Mazurska 484/2<br>Praha 8<br>18100<br>CZECH REPUBLIC            |
| 203509           | Jenickova Petra                        | Sub-Investigator/Co-Investigator | MD                     | ResTrial s.r.o., Poliklinika Mazurska<br>Mazurska 484/2<br>Praha 8<br>18100<br>CZECH REPUBLIC            |

\*CV provided as attachment to this appendix for all principal investigators

*Ensure that the printed copy of this document is the current version available on the Intranet.*

Property of the Sanofi Group - strictly confidential

Version Number: 4.0

28-JUL-2015

# SUPPLEMENTARY DATA

LIST OF PRINCIPAL INVESTIGATOR(S) AND SUB-INVESTIGATOR(S) PER STUDY SITE WHERE PATIENTS WERE ENROLLED

QSD-002219

Page 23 of 218

|                      |                |                    |          |
|----------------------|----------------|--------------------|----------|
| <b>Product Code:</b> | HOE901/AVE0010 | <b>Study Code:</b> | EFC12405 |
|----------------------|----------------|--------------------|----------|

| Study Center No. | Investigator last name and first name* | Role in the Investigation        | Professional Degree(s) | Institutional Affiliation(s)                                                                        |
|------------------|----------------------------------------|----------------------------------|------------------------|-----------------------------------------------------------------------------------------------------|
| 203509           | Malicherova Emilia                     | Sub-Investigator/Co-Investigator | MD                     | ResTrial s.r.o., Poliklinika Mazurska<br>Mazurska 484/2<br>Praha 8<br>18100<br>CZECH REPUBLIC       |
| 203509           | Roderova Eva                           | Sub-Investigator/Co-Investigator | MD                     | ResTrial s.r.o., Poliklinika Mazurska<br>Mazurska 484/2<br>Praha 8<br>18100<br>CZECH REPUBLIC       |
| 203511           | Bartaskova Dagmar                      | Sub-Investigator/Co-Investigator | MD                     | Diabetologicka ambulance Polymedica s.r.o.<br>Michnova 1622/4<br>Praha 4<br>14900<br>CZECH REPUBLIC |
| 203511           | Dvorakova Eva                          | Sub-Investigator/Co-Investigator | MD                     | Diabetologicka ambulance Polymedica s.r.o.<br>Michnova 1622/4<br>Praha 4<br>14900<br>CZECH REPUBLIC |
| 203511           | <a href="#">Kvapil Milan</a>           | Principal Investigator           | Prof., MD, PhD,<br>MBA | Diabetologicka ambulance Polymedica s.r.o.<br>Michnova 1622/4<br>Praha 4<br>14900<br>CZECH REPUBLIC |

\*CV provided as attachment to this appendix for all principal investigators

*Ensure that the printed copy of this document is the current version available on the Intranet.*

Property of the Sanofi Group - strictly confidential

Version Number: 4.0

28-JUL-2015

# SUPPLEMENTARY DATA

LIST OF PRINCIPAL INVESTIGATOR(S) AND SUB-INVESTIGATOR(S) PER STUDY SITE WHERE PATIENTS WERE ENROLLED

QSD-002219

Page 24 of 218

|                      |                |                    |          |
|----------------------|----------------|--------------------|----------|
| <b>Product Code:</b> | HOE901/AVE0010 | <b>Study Code:</b> | EFC12405 |
|----------------------|----------------|--------------------|----------|

| Study Center No. | Investigator last name and first name* | Role in the Investigation        | Professional Degree(s) | Institutional Affiliation(s)                                                             |
|------------------|----------------------------------------|----------------------------------|------------------------|------------------------------------------------------------------------------------------|
| 203514           | Hola Olga                              | Sub-Investigator/Co-Investigator | MD                     | Dieko s.r.o.<br>Karlovarska 30<br>Plzen<br>30100<br>CZECH REPUBLIC                       |
| 203514           | Kyselova Pavlina                       | Principal Investigator           | MD, PhD                | Dieko s.r.o.<br>Karlovarska 30<br>Plzen<br>30100<br>CZECH REPUBLIC                       |
| 203515           | Hola Olga                              | Sub-Investigator/Co-Investigator | MD                     | Interni a diabetologicka ambulance<br>Karlovarska 30<br>Plzen<br>30100<br>CZECH REPUBLIC |
| 203515           | Krystl Tomas                           | Principal Investigator           | MD                     | Interni a diabetologicka ambulance<br>Karlovarska 30<br>Plzen<br>30100<br>CZECH REPUBLIC |
| 208501           | Bo Jansen Rasmus                       | Sub-Investigator/Co-Investigator | MD                     | Bispebjerg Hospital<br>Bispebjerg Bakke 23<br>København Nv<br>2400<br>DENMARK            |

\*CV provided as attachment to this appendix for all principal investigators

*Ensure that the printed copy of this document is the current version available on the Intranet.*

Property of the Sanofi Group - strictly confidential

Version Number: 4.0

28-JUL-2015

# SUPPLEMENTARY DATA

LIST OF PRINCIPAL INVESTIGATOR(S) AND SUB-INVESTIGATOR(S) PER STUDY SITE WHERE PATIENTS WERE ENROLLED

QSD-002219

Page 25 of 218

|                      |                |                    |          |
|----------------------|----------------|--------------------|----------|
| <b>Product Code:</b> | HOE901/AVE0010 | <b>Study Code:</b> | EFC12405 |
|----------------------|----------------|--------------------|----------|

| Study Center No. | Investigator last name and first name* | Role in the Investigation        | Professional Degree(s) | Institutional Affiliation(s)                                                  |
|------------------|----------------------------------------|----------------------------------|------------------------|-------------------------------------------------------------------------------|
| 208501           | Hansen Caroline Raun                   | Sub-Investigator/Co-Investigator | MD                     | Bispebjerg Hospital<br>Bispebjerg Bakke 23<br>København Nv<br>2400<br>DENMARK |
| 208501           | Perrild Hans                           | Principal Investigator           | MD                     | Bispebjerg Hospital<br>Bispebjerg Bakke 23<br>København Nv<br>2400<br>DENMARK |
| 208501           | Svensden Ole Lander                    | Sub-Investigator/Co-Investigator | MD                     | Bispebjerg Hospital<br>Bispebjerg Bakke 23<br>København Nv<br>2400<br>DENMARK |
| 208502           | Duan Hongmei                           | Sub-Investigator/Co-Investigator | MD                     | Kolding Sygehus<br>Skovvangen 2-8<br>6000<br>Kolding<br>DENMARK               |
| 208502           | Sadauskiene Laima                      | Sub-Investigator/Co-Investigator | MD                     | Kolding Sygehus<br>Skovvangen 2-8<br>6000<br>Kolding<br>DENMARK               |

\*CV provided as attachment to this appendix for all principal investigators

*Ensure that the printed copy of this document is the current version available on the Intranet.*

Property of the Sanofi Group - strictly confidential

Version Number: 4.0

28-JUL-2015

# SUPPLEMENTARY DATA

LIST OF PRINCIPAL INVESTIGATOR(S) AND SUB-INVESTIGATOR(S) PER STUDY SITE WHERE PATIENTS WERE ENROLLED

QSD-002219

Page 26 of 218

|                      |                |                    |          |
|----------------------|----------------|--------------------|----------|
| <b>Product Code:</b> | HOE901/AVE0010 | <b>Study Code:</b> | EFC12405 |
|----------------------|----------------|--------------------|----------|

| Study Center No. | Investigator last name and first name* | Role in the Investigation        | Professional Degree(s) | Institutional Affiliation(s)                                                                                                  |
|------------------|----------------------------------------|----------------------------------|------------------------|-------------------------------------------------------------------------------------------------------------------------------|
| 208502           | Winther Rasmussen Ole                  | Principal Investigator           | MD                     | Kolding Sygehus<br>Skovvangen 2-8<br>6000<br>Kolding<br>DENMARK                                                               |
| 208503           | Hansen Troels Krarup                   | Principal Investigator           | MD                     | Aarhus Universitetshospital, Aarhus Sygehus,<br>Nørrebrogade 44, bygning 2A, 1. sal<br>MEA-KFA<br>Aarhus C<br>8000<br>DENMARK |
| 208503           | Otten Klaus                            | Sub-Investigator/Co-Investigator | MD                     | Aarhus Universitetshospital, Aarhus Sygehus,<br>Nørrebrogade 44, bygning 2A, 1. sal<br>MEA-KFA<br>Aarhus C<br>8000<br>DENMARK |
| 208503           | Skov Jeppe                             | Sub-Investigator/Co-Investigator | MD                     | Aarhus Universitetshospital, Aarhus Sygehus,<br>Nørrebrogade 44, bygning 2A, 1. sal<br>MEA-KFA<br>Aarhus C<br>8000<br>DENMARK |

\*CV provided as attachment to this appendix for all principal investigators

*Ensure that the printed copy of this document is the current version available on the Intranet.*

Property of the Sanofi Group - strictly confidential

Version Number: 4.0

28-JUL-2015

# SUPPLEMENTARY DATA

LIST OF PRINCIPAL INVESTIGATOR(S) AND SUB-INVESTIGATOR(S) PER STUDY SITE WHERE PATIENTS WERE ENROLLED

QSD-002219

Page 27 of 218

|                      |                |                    |          |
|----------------------|----------------|--------------------|----------|
| <b>Product Code:</b> | HOE901/AVE0010 | <b>Study Code:</b> | EFC12405 |
|----------------------|----------------|--------------------|----------|

| Study Center No. | Investigator last name and first name* | Role in the Investigation        | Professional Degree(s) | Institutional Affiliation(s)                                                                                                  |
|------------------|----------------------------------------|----------------------------------|------------------------|-------------------------------------------------------------------------------------------------------------------------------|
| 208503           | Østergaard Jakob                       | Sub-Investigator/Co-Investigator | PhD,MD                 | Aarhus Universitetshospital, Aarhus Sygehus,<br>Nørrebrogade 44, bygning 2A, 1. sal<br>MEA-KFA<br>Aarhus C<br>8000<br>DENMARK |
| 208504           | Helleberg Kjeld                        | Sub-Investigator/Co-Investigator | MD                     | Regionshospitalet Viborg<br>Endokrinologisk ambulatorium<br>Søndersøparken 14, 1. sal<br>Viborg<br>8800<br>DENMARK            |
| 208504           | Shukla Atul                            | Sub-Investigator/Co-Investigator | MD                     | Regionshospitalet Viborg<br>Endokrinologisk ambulatorium<br>Søndersøparken 14, 1. sal<br>Viborg<br>8800<br>DENMARK            |
| 208504           | <a href="#">Ostergard Torben</a>       | Principal Investigator           | MD                     | Regionshospitalet Viborg<br>Endokrinologisk ambulatorium<br>Søndersøparken 14, 1. sal<br>Viborg<br>8800<br>DENMARK            |

\*CV provided as attachment to this appendix for all principal investigators

*Ensure that the printed copy of this document is the current version available on the Intranet.*

Property of the Sanofi Group - strictly confidential

Version Number: 4.0

28-JUL-2015

# SUPPLEMENTARY DATA

LIST OF PRINCIPAL INVESTIGATOR(S) AND SUB-INVESTIGATOR(S) PER STUDY SITE WHERE PATIENTS WERE ENROLLED

QSD-002219

Page 28 of 218

|                      |                |                    |          |
|----------------------|----------------|--------------------|----------|
| <b>Product Code:</b> | HOE901/AVE0010 | <b>Study Code:</b> | EFC12405 |
|----------------------|----------------|--------------------|----------|

| Study Center No. | Investigator last name and first name* | Role in the Investigation        | Professional Degree(s) | Institutional Affiliation(s)                                                                              |
|------------------|----------------------------------------|----------------------------------|------------------------|-----------------------------------------------------------------------------------------------------------|
| 208505           | Anholm Christian                       | Sub-Investigator/Co-Investigator | MD                     | Amager Hospital<br>Med Amb, opgang 5, 2. sal<br>Italiensvej 1<br>København S<br>2300<br>DENMARK           |
| 208505           | Frandsen Hans                          | Principal Investigator           | MD                     | Amager Hospital<br>Med Amb, opgang 5, 2. sal<br>Italiensvej 1<br>København S<br>2300<br>DENMARK           |
| 208509           | Carstensen Marius                      | Sub-Investigator/Co-Investigator | PhD,MD                 | Regionshospitalet Horsens<br>Diabetes ambulatoriet<br>Sundvej 30, indgang A<br>Horsens<br>8700<br>DENMARK |
| 208509           | Kaal Andreas                           | Sub-Investigator/Co-Investigator | MD                     | Regionshospitalet Horsens<br>Diabetes ambulatoriet<br>Sundvej 30, indgang A<br>Horsens<br>8700<br>DENMARK |

\*CV provided as attachment to this appendix for all principal investigators

*Ensure that the printed copy of this document is the current version available on the Intranet.*

Property of the Sanofi Group - strictly confidential

Version Number: 4.0

28-JUL-2015

# SUPPLEMENTARY DATA

LIST OF PRINCIPAL INVESTIGATOR(S) AND SUB-INVESTIGATOR(S) PER STUDY SITE WHERE PATIENTS WERE ENROLLED

QSD-002219

Page 29 of 218

|                      |                |                    |          |
|----------------------|----------------|--------------------|----------|
| <b>Product Code:</b> | HOE901/AVE0010 | <b>Study Code:</b> | EFC12405 |
|----------------------|----------------|--------------------|----------|

| Study Center No. | Investigator last name and first name* | Role in the Investigation        | Professional Degree(s) | Institutional Affiliation(s)                                                                              |
|------------------|----------------------------------------|----------------------------------|------------------------|-----------------------------------------------------------------------------------------------------------|
| 208509           | Moller Marianne Kleis                  | Principal Investigator           | MD                     | Regionshospitalet Horsens<br>Diabetes ambulatoriet<br>Sundvej 30, indgang A<br>Horsens<br>8700<br>DENMARK |
| 208509           | Riis Anne Lene                         | Sub-Investigator/Co-Investigator | MD                     | Regionshospitalet Horsens<br>Diabetes ambulatoriet<br>Sundvej 30, indgang A<br>Horsens<br>8700<br>DENMARK |
| 233501           | Gusseva Olga                           | Sub-Investigator/Co-Investigator | MD                     | SA Tartu Ülikooli Kliinikum<br>Sisekliinik<br>L. Puusepa 6<br>Tartu<br>51014<br>ESTONIA                   |
| 233501           | Lubi Maire                             | Principal Investigator           | MD                     | SA Tartu Ülikooli Kliinikum<br>Sisekliinik<br>L. Puusepa 6<br>Tartu<br>51014<br>ESTONIA                   |

\*CV provided as attachment to this appendix for all principal investigators

*Ensure that the printed copy of this document is the current version available on the Intranet.*

Property of the Sanofi Group - strictly confidential

Version Number: 4.0

28-JUL-2015



# SUPPLEMENTARY DATA

LIST OF PRINCIPAL INVESTIGATOR(S) AND SUB-INVESTIGATOR(S) PER STUDY SITE WHERE PATIENTS WERE ENROLLED

QSD-002219

Page 30 of 218

|               |                |             |          |
|---------------|----------------|-------------|----------|
| Product Code: | HOE901/AVE0010 | Study Code: | EFC12405 |
|---------------|----------------|-------------|----------|

| Study Center No. | Investigator last name and first name* | Role in the Investigation        | Professional Degree(s) | Institutional Affiliation(s)                                                            |
|------------------|----------------------------------------|----------------------------------|------------------------|-----------------------------------------------------------------------------------------|
| 233501           | Tammiksaar Kaia                        | Sub-Investigator/Co-Investigator | MD                     | SA Tartu Ülikooli Kliinikum<br>Sisekliinik<br>L. Puusepa 6<br>Tartu<br>51014<br>ESTONIA |
| 233502           | Lipmann Eha                            | Sub-Investigator/Co-Investigator | MD                     | Liina Viitas OÜ<br>Veetorni 2-1<br>Pärnu<br>80018<br>ESTONIA                            |
| 233502           | Viitas Liina                           | Principal Investigator           | MD                     | Liina Viitas OÜ<br>Veetorni 2-1<br>Pärnu<br>80018<br>ESTONIA                            |
| 233503           | Jakovlev Ulle                          | Principal Investigator           | MD                     | AS Ida-Tallinna Keskhaigla<br>Sisekliinik<br>Ravi tn 18<br>10138<br>ESTONIA             |
| 233503           | Merendi Ulvi                           | Sub-Investigator/Co-Investigator | MD                     | AS Ida-Tallinna Keskhaigla<br>Sisekliinik<br>Ravi tn 18<br>10138<br>ESTONIA             |

\*CV provided as attachment to this appendix for all principal investigators

*Ensure that the printed copy of this document is the current version available on the Intranet.*

Property of the Sanofi Group - strictly confidential

Version Number: 4.0

28-JUL-2015

# SUPPLEMENTARY DATA

LIST OF PRINCIPAL INVESTIGATOR(S) AND SUB-INVESTIGATOR(S) PER STUDY SITE WHERE PATIENTS WERE ENROLLED

QSD-002219

Page 31 of 218

|                      |                |                    |          |
|----------------------|----------------|--------------------|----------|
| <b>Product Code:</b> | HOE901/AVE0010 | <b>Study Code:</b> | EFC12405 |
|----------------------|----------------|--------------------|----------|

| Study Center No. | Investigator last name and first name* | Role in the Investigation        | Professional Degree(s) | Institutional Affiliation(s)                                                                                               |
|------------------|----------------------------------------|----------------------------------|------------------------|----------------------------------------------------------------------------------------------------------------------------|
| 348501           | Adorjáni Endre                         | Sub-Investigator/Co-Investigator | MD                     | Szűcs Depot Egészségügyi Szolgáltató<br>József Attila u. 52. I/5<br>Budapest<br>1042<br>HUNGARY                            |
| 348501           | <a href="#">Szocs Albert</a>           | Principal Investigator           | MD                     | Szűcs Depot Egészségügyi Szolgáltató<br>József Attila u. 52. I/5<br>Budapest<br>1042<br>HUNGARY                            |
| 348502           | <a href="#">Petro Gizella</a>          | Principal Investigator           | MD                     | Kenézy Gyula Kórház és Rendelőintézet<br>Bartók B. Út 2/26.<br>Debrecen<br>4031<br>HUNGARY                                 |
| 348502           | Vámos Árpád                            | Sub-Investigator/Co-Investigator | MD                     | Kenézy Gyula Kórház és Rendelőintézet<br>Bartók B. Út 2/26.<br>Debrecen<br>4031<br>HUNGARY                                 |
| 348503           | Csik János                             | Sub-Investigator/Co-Investigator | MD                     | Magyar Honvédség Egészségügyi Központ<br>Diabetológiai Szakrendelés, Róbert Károly krt. 44.<br>Budapest<br>1134<br>HUNGARY |

\*CV provided as attachment to this appendix for all principal investigators

*Ensure that the printed copy of this document is the current version available on the Intranet.*

Property of the Sanofi Group - strictly confidential

Version Number: 4.0

28-JUL-2015

# SUPPLEMENTARY DATA

LIST OF PRINCIPAL INVESTIGATOR(S) AND SUB-INVESTIGATOR(S) PER STUDY SITE WHERE PATIENTS WERE ENROLLED

QSD-002219

Page 32 of 218

|                      |                |                    |          |
|----------------------|----------------|--------------------|----------|
| <b>Product Code:</b> | HOE901/AVE0010 | <b>Study Code:</b> | EFC12405 |
|----------------------|----------------|--------------------|----------|

| Study Center No. | Investigator last name and first name* | Role in the Investigation        | Professional Degree(s) | Institutional Affiliation(s)                                                                                               |
|------------------|----------------------------------------|----------------------------------|------------------------|----------------------------------------------------------------------------------------------------------------------------|
| 348503           | Schandl Laszlo                         | Sub-Investigator/Co-Investigator | PhD,MD                 | Magyar Honvédség Egészségügyi Központ<br>Diabetológiai Szakrendelés, Róbert Károly krt. 44.<br>Budapest<br>1134<br>HUNGARY |
| 348503           | Hevesi Judit                           | Sub-Investigator/Co-Investigator | MD                     | Magyar Honvédség Egészségügyi Központ<br>Diabetológiai Szakrendelés, Róbert Károly krt. 44.<br>Budapest<br>1134<br>HUNGARY |
| 348503           | Sasvari Ildiko                         | Principal Investigator           | MD                     | Magyar Honvédség Egészségügyi Központ<br>Diabetológiai Szakrendelés, Róbert Károly krt. 44.<br>Budapest<br>1134<br>HUNGARY |
| 348504           | Kiss Julianna                          | Principal Investigator           | MD                     | Gróf Esterházy Kórház és Rendelőintézeti<br>Szakrendelő<br>Jókai Út 5-9.<br>Pápa<br>8500<br>HUNGARY                        |

\*CV provided as attachment to this appendix for all principal investigators

*Ensure that the printed copy of this document is the current version available on the Intranet.*

Property of the Sanofi Group - strictly confidential

Version Number: 4.0

28-JUL-2015

# SUPPLEMENTARY DATA

LIST OF PRINCIPAL INVESTIGATOR(S) AND SUB-INVESTIGATOR(S) PER STUDY SITE WHERE PATIENTS WERE ENROLLED

QSD-002219

Page 33 of 218

|                      |                |                    |          |
|----------------------|----------------|--------------------|----------|
| <b>Product Code:</b> | HOE901/AVE0010 | <b>Study Code:</b> | EFC12405 |
|----------------------|----------------|--------------------|----------|

| Study Center No. | Investigator last name and first name* | Role in the Investigation        | Professional Degree(s) | Institutional Affiliation(s)                                                                                         |
|------------------|----------------------------------------|----------------------------------|------------------------|----------------------------------------------------------------------------------------------------------------------|
| 348504           | Patyi Andrea                           | Sub-Investigator/Co-Investigator | MD                     | Gróf Esterházy Kórház és Rendelőintézet<br>Szakrendelő<br>Jókai Út 5-9.<br>Pápa<br>8500<br>HUNGARY                   |
| 348505           | Harangozó Andrea                       | Sub-Investigator/Co-Investigator | MD                     | Tóth Ilona Egészségügyi Szolgálat<br>XXI. Csepel Önkormányzata<br>Görgey Artúr tér 8.<br>Budapest<br>1212<br>HUNGARY |
| 348505           | Kerenyi Zsuzsanna                      | Principal Investigator           | MD                     | Tóth Ilona Egészségügyi Szolgálat<br>XXI. Csepel Önkormányzata<br>Görgey Artúr tér 8.<br>Budapest<br>1212<br>HUNGARY |
| 348505           | Szatmári Ildikó                        | Sub-Investigator/Co-Investigator | DrMed                  | Tóth Ilona Egészségügyi Szolgálat<br>XXI. Csepel Önkormányzata<br>Görgey Artúr tér 8.<br>Budapest<br>1212<br>HUNGARY |

\*CV provided as attachment to this appendix for all principal investigators

*Ensure that the printed copy of this document is the current version available on the Intranet.*

Property of the Sanofi Group - strictly confidential

Version Number: 4.0

28-JUL-2015

# SUPPLEMENTARY DATA

LIST OF PRINCIPAL INVESTIGATOR(S) AND SUB-INVESTIGATOR(S) PER STUDY SITE WHERE PATIENTS WERE ENROLLED

QSD-002219

Page 34 of 218

|                      |                |                    |          |
|----------------------|----------------|--------------------|----------|
| <b>Product Code:</b> | HOE901/AVE0010 | <b>Study Code:</b> | EFC12405 |
|----------------------|----------------|--------------------|----------|

| Study Center No. | Investigator last name and first name* | Role in the Investigation        | Professional Degree(s) | Institutional Affiliation(s)                                                                                         |
|------------------|----------------------------------------|----------------------------------|------------------------|----------------------------------------------------------------------------------------------------------------------|
| 348505           | Szkenderovics Károly                   | Sub-Investigator/Co-Investigator | MD                     | Tóth Ilona Egészségügyi Szolgálat<br>XXI. Csepel Önkormányzata<br>Görgey Artúr tér 8.<br>Budapest<br>1212<br>HUNGARY |
| 348505           | Wudi Krisztina                         | Sub-Investigator/Co-Investigator | MD                     | Tóth Ilona Egészségügyi Szolgálat<br>XXI. Csepel Önkormányzata<br>Görgey Artúr tér 8.<br>Budapest<br>1212<br>HUNGARY |
| 348506           | Deak Laszlo                            | Principal Investigator           | MD                     | Somogy Megyei Kaposi Mór Oktató Kórház<br>Tallán Gy.u. 20-32.<br>Kaposvár<br>7400<br>HUNGARY                         |
| 348506           | Dezso Eniko                            | Sub-Investigator/Co-Investigator | MD                     | Somogy Megyei Kaposi Mór Oktató Kórház<br>Tallán Gy.u. 20-32.<br>Kaposvár<br>7400<br>HUNGARY                         |

\*CV provided as attachment to this appendix for all principal investigators

*Ensure that the printed copy of this document is the current version available on the Intranet.*

Property of the Sanofi Group - strictly confidential

Version Number: 4.0

28-JUL-2015

# SUPPLEMENTARY DATA

LIST OF PRINCIPAL INVESTIGATOR(S) AND SUB-INVESTIGATOR(S) PER STUDY SITE WHERE PATIENTS WERE ENROLLED

QSD-002219

Page 35 of 218

|                      |                |                    |          |
|----------------------|----------------|--------------------|----------|
| <b>Product Code:</b> | HOE901/AVE0010 | <b>Study Code:</b> | EFC12405 |
|----------------------|----------------|--------------------|----------|

| Study Center No. | Investigator last name and first name* | Role in the Investigation        | Professional Degree(s) | Institutional Affiliation(s)                                                                 |
|------------------|----------------------------------------|----------------------------------|------------------------|----------------------------------------------------------------------------------------------|
| 440501           | Denisova Natalija                      | Principal Investigator           | MD                     | Kaunas Silainiai Outpatient clinic<br>Baltu ave. 7A<br>Kaunas<br>LT-48259<br>LITHUANIA       |
| 440501           | Kazanaviciene Birute                   | Sub-Investigator/Co-Investigator | MD                     | Kaunas Silainiai Outpatient clinic<br>Baltu ave. 7A<br>Kaunas<br>LT-48259<br>LITHUANIA       |
| 440501           | Urbanaviciene Egle                     | Sub-Investigator/Co-Investigator | PhD,MD                 | Kaunas Silainiai Outpatient clinic<br>Baltu ave. 7A<br>Kaunas<br>LT-48259<br>LITHUANIA       |
| 440502           | Ivanauskiene Regina                    | Sub-Investigator/Co-Investigator | MD                     | Center for Clinical and Basic Research<br>Smelio str. 20<br>Vilnius<br>LT-10323<br>LITHUANIA |
| 440502           | Motiejuniene Lilit Elona               | Sub-Investigator/Co-Investigator | MD                     | Center for Clinical and Basic Research<br>Smelio str. 20<br>Vilnius<br>LT-10323<br>LITHUANIA |

\*CV provided as attachment to this appendix for all principal investigators

*Ensure that the printed copy of this document is the current version available on the Intranet.*

Property of the Sanofi Group - strictly confidential

Version Number: 4.0

28-JUL-2015

# SUPPLEMENTARY DATA

LIST OF PRINCIPAL INVESTIGATOR(S) AND SUB-INVESTIGATOR(S) PER STUDY SITE WHERE PATIENTS WERE ENROLLED

QSD-002219

Page 36 of 218

|                      |                |                    |          |
|----------------------|----------------|--------------------|----------|
| <b>Product Code:</b> | HOE901/AVE0010 | <b>Study Code:</b> | EFC12405 |
|----------------------|----------------|--------------------|----------|

| Study Center No. | Investigator last name and first name* | Role in the Investigation        | Professional Degree(s) | Institutional Affiliation(s)                                                                                         |
|------------------|----------------------------------------|----------------------------------|------------------------|----------------------------------------------------------------------------------------------------------------------|
| 440502           | Visockiene Zydruone                    | Principal Investigator           | PhD                    | Center for Clinical and Basic Research<br>Smelio str. 20<br>Vilnius<br>LT-10323<br>LITHUANIA                         |
| 440503           | Barsiene Lina                          | Sub-Investigator/Co-Investigator | MD, PhD                | Saules Family Medicine Center<br>Partizanu str. 27D<br>Kaunas<br>LT-49456<br>LITHUANIA                               |
| 440503           | Kaupiene Jugeta                        | Sub-Investigator/Co-Investigator | MD                     | Saules Family Medicine Center<br>Partizanu str. 27D<br>Kaunas<br>LT-49456<br>LITHUANIA                               |
| 440503           | Urbonas Gediminas                      | Principal Investigator           | DrSc,MD                | Saules Family Medicine Center<br>Partizanu str. 27D<br>Kaunas<br>LT-49456<br>LITHUANIA                               |
| 440504           | Gailiuniene Sigita                     | Principal Investigator           | MD                     | Klaipeda Republican Hospital Consulting<br>Outpatient clinic<br>H. Manto st. 49<br>Klaipeda<br>LT-92253<br>LITHUANIA |

\*CV provided as attachment to this appendix for all principal investigators

*Ensure that the printed copy of this document is the current version available on the Intranet.*

Property of the Sanofi Group - strictly confidential

Version Number: 4.0

28-JUL-2015

# SUPPLEMENTARY DATA

LIST OF PRINCIPAL INVESTIGATOR(S) AND SUB-INVESTIGATOR(S) PER STUDY SITE WHERE PATIENTS WERE ENROLLED

QSD-002219

Page 37 of 218

|                      |                |                    |          |
|----------------------|----------------|--------------------|----------|
| <b>Product Code:</b> | HOE901/AVE0010 | <b>Study Code:</b> | EFC12405 |
|----------------------|----------------|--------------------|----------|

| Study Center No. | Investigator last name and first name* | Role in the Investigation        | Professional Degree(s) | Institutional Affiliation(s)                                                                                                                |
|------------------|----------------------------------------|----------------------------------|------------------------|---------------------------------------------------------------------------------------------------------------------------------------------|
| 440504           | Platakiene Vilija                      | Sub-Investigator/Co-Investigator | MD                     | Klaipeda Republican Hospital Consulting<br>Outpatient clinic<br>H. Manto st. 49<br>Klaipeda<br>LT-92253<br>LITHUANIA                        |
| 440505           | Dauksiene Dalia                        | Sub-Investigator/Co-Investigator | PhD,MD                 | Kedainiai hospital Outpatient clinic<br>Budrio str. 5<br>Kedainiai<br>LT-57164<br>LITHUANIA                                                 |
| 440505           | Zilaitiene Birute                      | Principal Investigator           | MD,PhD                 | Kedainiai hospital Outpatient clinic<br>Budrio str. 5<br>Kedainiai<br>LT-57164<br>LITHUANIA                                                 |
| 484501           | Baez-Campos Aurelia                    | Sub-Investigator/Co-Investigator | MD                     | Instituto de Diabetes, Obesidad y Nutricion S.C.<br>Calle 5 de Mayo No. 400<br>Col. El Empleado<br>Cuernavaca<br>62250<br>Morelos<br>MEXICO |

\*CV provided as attachment to this appendix for all principal investigators

*Ensure that the printed copy of this document is the current version available on the Intranet.*

Property of the Sanofi Group - strictly confidential

Version Number: 4.0

28-JUL-2015



# SUPPLEMENTARY DATA

LIST OF PRINCIPAL INVESTIGATOR(S) AND SUB-INVESTIGATOR(S) PER STUDY SITE WHERE PATIENTS WERE ENROLLED

QSD-002219

Page 38 of 218

|                      |                |                    |          |
|----------------------|----------------|--------------------|----------|
| <b>Product Code:</b> | HOE901/AVE0010 | <b>Study Code:</b> | EFC12405 |
|----------------------|----------------|--------------------|----------|

| Study Center No. | Investigator last name and first name* | Role in the Investigation        | Professional Degree(s) | Institutional Affiliation(s)                                                                                                                |
|------------------|----------------------------------------|----------------------------------|------------------------|---------------------------------------------------------------------------------------------------------------------------------------------|
| 484501           | Peralta-Cantu Irving Alain             | Sub-Investigator/Co-Investigator | MD                     | Instituto de Diabetes, Obesidad y Nutricion S.C.<br>Calle 5 de Mayo No. 400<br>Col. El Empleado<br>Cuernavaca<br>62250<br>Morelos<br>MEXICO |
| 484501           | Sanchez-Vargas Pedro Rafael            | Sub-Investigator/Co-Investigator | MD                     | Instituto de Diabetes, Obesidad y Nutricion S.C.<br>Calle 5 de Mayo No. 400<br>Col. El Empleado<br>Cuernavaca<br>62250<br>Morelos<br>MEXICO |
| 484501           | Sauque Reyna Leobardo                  | Principal Investigator           | MD                     | Instituto de Diabetes, Obesidad y Nutricion S.C.<br>Calle 5 de Mayo No. 400<br>Col. El Empleado<br>Cuernavaca<br>62250<br>Morelos<br>MEXICO |

\*CV provided as attachment to this appendix for all principal investigators

*Ensure that the printed copy of this document is the current version available on the Intranet.*

Property of the Sanofi Group - strictly confidential

Version Number: 4.0

28-JUL-2015

# SUPPLEMENTARY DATA

LIST OF PRINCIPAL INVESTIGATOR(S) AND SUB-INVESTIGATOR(S) PER STUDY SITE WHERE PATIENTS WERE ENROLLED

QSD-002219

Page 39 of 218

|                      |                |                    |          |
|----------------------|----------------|--------------------|----------|
| <b>Product Code:</b> | HOE901/AVE0010 | <b>Study Code:</b> | EFC12405 |
|----------------------|----------------|--------------------|----------|

| Study Center No. | Investigator last name and first name* | Role in the Investigation        | Professional Degree(s) | Institutional Affiliation(s)                                                                                                      |
|------------------|----------------------------------------|----------------------------------|------------------------|-----------------------------------------------------------------------------------------------------------------------------------|
| 484503           | Alvarez-Carrillo Rebeca                | Sub-Investigator/Co-Investigator | MD                     | Diseño y Planeacion en Investigacion Medica S.C.<br>Morelos 2203 Col. Arcos Vallarta<br>Guadalajara<br>44130<br>Jalisco<br>MEXICO |
| 484503           | Calvo-Vargas Cesar                     | Principal Investigator           | MD                     | Diseño y Planeacion en Investigacion Medica S.C.<br>Morelos 2203 Col. Arcos Vallarta<br>Guadalajara<br>44130<br>Jalisco<br>MEXICO |
| 484503           | Estrada-Carlos Suellen Alejandra       | Sub-Investigator/Co-Investigator | MD                     | Diseño y Planeacion en Investigacion Medica S.C.<br>Morelos 2203 Col. Arcos Vallarta<br>Guadalajara<br>44130<br>Jalisco<br>MEXICO |
| 484503           | Loredo-Padron Imelda                   | Sub-Investigator/Co-Investigator | MD                     | Diseño y Planeacion en Investigacion Medica S.C.<br>Morelos 2203 Col. Arcos Vallarta<br>Guadalajara<br>44130<br>Jalisco<br>MEXICO |

\*CV provided as attachment to this appendix for all principal investigators

*Ensure that the printed copy of this document is the current version available on the Intranet.*

Property of the Sanofi Group - strictly confidential

Version Number: 4.0

28-JUL-2015

# SUPPLEMENTARY DATA

LIST OF PRINCIPAL INVESTIGATOR(S) AND SUB-INVESTIGATOR(S) PER STUDY SITE WHERE PATIENTS WERE ENROLLED

QSD-002219

Page 40 of 218

|                      |                |                    |          |
|----------------------|----------------|--------------------|----------|
| <b>Product Code:</b> | HOE901/AVE0010 | <b>Study Code:</b> | EFC12405 |
|----------------------|----------------|--------------------|----------|

| Study Center No. | Investigator last name and first name* | Role in the Investigation        | Professional Degree(s) | Institutional Affiliation(s)                                                                                                      |
|------------------|----------------------------------------|----------------------------------|------------------------|-----------------------------------------------------------------------------------------------------------------------------------|
| 484503           | Ramirez-Pompa Maria Del Carmen         | Sub-Investigator/Co-Investigator | MD                     | Diseño y Planeacion en Investigacion Medica S.C.<br>Morelos 2203 Col. Arcos Vallarta<br>Guadalajara<br>44130<br>Jalisco<br>MEXICO |
| 484503           | Vera-Bocanegra Alejandro               | Sub-Investigator/Co-Investigator | MD                     | Diseño y Planeacion en Investigacion Medica S.C.<br>Morelos 2203 Col. Arcos Vallarta<br>Guadalajara<br>44130<br>Jalisco<br>MEXICO |
| 484504           | <a href="#">Aguilar Orozco Raul</a>    | Principal Investigator           | MD                     | Doctor's Office<br>Salto del Agua 2154 L4<br>Col. Jardines del Country<br>Guadalajara<br>44210<br>Jalisco<br>MEXICO               |
| 484504           | Vargas-Flores Armando Rafael           | Sub-Investigator/Co-Investigator | MD                     | Doctor's Office<br>Salto del Agua 2154 L4<br>Col. Jardines del Country<br>Guadalajara<br>44210<br>Jalisco<br>MEXICO               |

\*CV provided as attachment to this appendix for all principal investigators

*Ensure that the printed copy of this document is the current version available on the Intranet.*

Property of the Sanofi Group - strictly confidential

Version Number: 4.0

28-JUL-2015

# SUPPLEMENTARY DATA

LIST OF PRINCIPAL INVESTIGATOR(S) AND SUB-INVESTIGATOR(S) PER STUDY SITE WHERE PATIENTS WERE ENROLLED

QSD-002219

Page 41 of 218

|                      |                |                    |          |
|----------------------|----------------|--------------------|----------|
| <b>Product Code:</b> | HOE901/AVE0010 | <b>Study Code:</b> | EFC12405 |
|----------------------|----------------|--------------------|----------|

| Study Center No. | Investigator last name and first name* | Role in the Investigation        | Professional Degree(s) | Institutional Affiliation(s)                                                                                                                     |
|------------------|----------------------------------------|----------------------------------|------------------------|--------------------------------------------------------------------------------------------------------------------------------------------------|
| 484505           | Barrientos Perez Margarita             | Principal Investigator           | MD                     | Hospital Angeles Puebla<br>Av. Kepler 2143<br>Cons. 715B<br>Col. Reserva Territorial Atlixcayotl<br>Puebla<br>72190<br>Puebla<br>MEXICO          |
| 484505           | Pulido-Palacios Sandra                 | Sub-Investigator/Co-Investigator | MD                     | Hospital Angeles Puebla<br>Av. Kepler 2143<br>Cons. 715B<br>Col. Reserva Territorial Atlixcayotl<br>Puebla<br>72190<br>Puebla<br>MEXICO          |
| 484506           | Castillo Herrera Claudia Georgina      | Sub-Investigator/Co-Investigator | MD                     | Instituto Jalisco de Investigacion en Diabetes<br>Obesidad<br>Morelos 1952 -1Col. Ladrón de Guevara<br>Guadalajara<br>44600<br>Jalisco<br>MEXICO |

\*CV provided as attachment to this appendix for all principal investigators

*Ensure that the printed copy of this document is the current version available on the Intranet.*

Property of the Sanofi Group - strictly confidential

Version Number: 4.0

28-JUL-2015

# SUPPLEMENTARY DATA

LIST OF PRINCIPAL INVESTIGATOR(S) AND SUB-INVESTIGATOR(S) PER STUDY SITE WHERE PATIENTS WERE ENROLLED

QSD-002219

Page 42 of 218

|                      |                |                    |          |
|----------------------|----------------|--------------------|----------|
| <b>Product Code:</b> | HOE901/AVE0010 | <b>Study Code:</b> | EFC12405 |
|----------------------|----------------|--------------------|----------|

| Study Center No. | Investigator last name and first name* | Role in the Investigation        | Professional Degree(s) | Institutional Affiliation(s)                                                                                                                      |
|------------------|----------------------------------------|----------------------------------|------------------------|---------------------------------------------------------------------------------------------------------------------------------------------------|
| 484506           | Cuellar Lemus Alma Gabriela            | Sub-Investigator/Co-Investigator | MD                     | Instituto Jaliscience de Investigacion en Diabetes Obesidad<br>Morelos 1952 -1Col. Ladrón de Guevara<br>Guadalajara<br>44600<br>Jalisco<br>MEXICO |
| 484506           | Gonzalez Galvez Guillermo              | Principal Investigator           | MD                     | Instituto Jaliscience de Investigacion en Diabetes Obesidad<br>Morelos 1952 -1Col. Ladrón de Guevara<br>Guadalajara<br>44600<br>Jalisco<br>MEXICO |
| 484506           | Gonzalez Gonzalez Alba Edith           | Sub-Investigator/Co-Investigator | MD                     | Instituto Jaliscience de Investigacion en Diabetes Obesidad<br>Morelos 1952 -1Col. Ladrón de Guevara<br>Guadalajara<br>44600<br>Jalisco<br>MEXICO |

\*CV provided as attachment to this appendix for all principal investigators

*Ensure that the printed copy of this document is the current version available on the Intranet.*

Property of the Sanofi Group - strictly confidential

Version Number: 4.0

28-JUL-2015

# SUPPLEMENTARY DATA

LIST OF PRINCIPAL INVESTIGATOR(S) AND SUB-INVESTIGATOR(S) PER STUDY SITE WHERE PATIENTS WERE ENROLLED

QSD-002219

Page 43 of 218

|                      |                |                    |          |
|----------------------|----------------|--------------------|----------|
| <b>Product Code:</b> | HOE901/AVE0010 | <b>Study Code:</b> | EFC12405 |
|----------------------|----------------|--------------------|----------|

| Study Center No. | Investigator last name and first name* | Role in the Investigation        | Professional Degree(s) | Institutional Affiliation(s)                                                                                                                      |
|------------------|----------------------------------------|----------------------------------|------------------------|---------------------------------------------------------------------------------------------------------------------------------------------------|
| 484506           | Lopez Velasco Martha Leticia           | Sub-Investigator/Co-Investigator | MD                     | Instituto Jaliscience de Investigacion en Diabetes Obesidad<br>Morelos 1952 -1Col. Ladrón de Guevara<br>Guadalajara<br>44600<br>Jalisco<br>MEXICO |
| 484506           | Sanchez Michel Blanca Leticia          | Sub-Investigator/Co-Investigator | MD                     | Instituto Jaliscience de Investigacion en Diabetes Obesidad<br>Morelos 1952 -1Col. Ladrón de Guevara<br>Guadalajara<br>44600<br>Jalisco<br>MEXICO |
| 484506           | Sanchez Mercado Martha Daniela         | Sub-Investigator/Co-Investigator | MD                     | Instituto Jaliscience de Investigacion en Diabetes Obesidad<br>Morelos 1952 -1Col. Ladrón de Guevara<br>Guadalajara<br>44600<br>Jalisco<br>MEXICO |

\*CV provided as attachment to this appendix for all principal investigators

*Ensure that the printed copy of this document is the current version available on the Intranet.*

Property of the Sanofi Group - strictly confidential

Version Number: 4.0

28-JUL-2015

# SUPPLEMENTARY DATA

LIST OF PRINCIPAL INVESTIGATOR(S) AND SUB-INVESTIGATOR(S) PER STUDY SITE WHERE PATIENTS WERE ENROLLED

QSD-002219

Page 44 of 218

|               |                |             |          |
|---------------|----------------|-------------|----------|
| Product Code: | HOE901/AVE0010 | Study Code: | EFC12405 |
|---------------|----------------|-------------|----------|

| Study Center No. | Investigator last name and first name* | Role in the Investigation        | Professional Degree(s) | Institutional Affiliation(s)                                                                                                                                                                     |
|------------------|----------------------------------------|----------------------------------|------------------------|--------------------------------------------------------------------------------------------------------------------------------------------------------------------------------------------------|
| 484507           | Hernandez-Perez Jose Luis              | Sub-Investigator/Co-Investigator | MD                     | Resultados Médico, Desarrollo e Investigación, S.C.<br>Boulevard Luis Donaldo Colosio No.212, Torre A, 2do Piso,<br>Fracc. Arboledas de San Javier, Pachuca, Hidalgo, México. ZC 42084<br>MEXICO |
| 484507           | Morales De Teresa Marco                | Principal Investigator           | MD                     | Resultados Médico, Desarrollo e Investigación, S.C.<br>Boulevard Luis Donaldo Colosio No.212, Torre A, 2do Piso,<br>Fracc. Arboledas de San Javier, Pachuca, Hidalgo, México. ZC 42084<br>MEXICO |
| 484508           | Rosas Guzman Juan                      | Principal Investigator           | MD                     | Centro de Especialidades Medicas de Celaya Obregon No. 209-110<br>Celaya<br>38000<br>Guanajuato<br>MEXICO                                                                                        |
| 484508           | Navarro Canchola Joel Eugenio          | Sub-Investigator/Co-Investigator | MD                     | Centro de Especialidades Medicas de Celaya Obregon No. 209-110<br>Celaya<br>38000<br>Guanajuato<br>MEXICO                                                                                        |

\*CV provided as attachment to this appendix for all principal investigators

*Ensure that the printed copy of this document is the current version available on the Intranet.*

Property of the Sanofi Group - strictly confidential

Version Number: 4.0

28-JUL-2015

# SUPPLEMENTARY DATA

LIST OF PRINCIPAL INVESTIGATOR(S) AND SUB-INVESTIGATOR(S) PER STUDY SITE WHERE PATIENTS WERE ENROLLED

QSD-002219

Page 45 of 218

|                      |                |                    |          |
|----------------------|----------------|--------------------|----------|
| <b>Product Code:</b> | HOE901/AVE0010 | <b>Study Code:</b> | EFC12405 |
|----------------------|----------------|--------------------|----------|

| Study Center No. | Investigator last name and first name* | Role in the Investigation        | Professional Degree(s) | Institutional Affiliation(s)                                                                                                   |
|------------------|----------------------------------------|----------------------------------|------------------------|--------------------------------------------------------------------------------------------------------------------------------|
| 484509           | Aguilar-Espinoza Luis Horacio          | Sub-Investigator/Co-Investigator | MD                     | Arke Estudios Clinicos S.A. de C.V.<br>Cozumel No. 90 Col. Roma, MEXICO, CP 06700<br>México<br>06700<br>México, D.F.<br>MEXICO |
| 484509           | Gaspar Lopez Arturo                    | Principal Investigator           | MD                     | Arke Estudios Clinicos S.A. de C.V.<br>Cozumel No. 90 Col. Roma, MEXICO, CP 06700<br>México<br>06700<br>México, D.F.<br>MEXICO |
| 484509           | Jaimes-Diaz Jose Luis                  | Sub-Investigator/Co-Investigator | MD                     | Arke Estudios Clinicos S.A. de C.V.<br>Cozumel No. 90 Col. Roma, MEXICO, CP 06700<br>México<br>06700<br>México, D.F.<br>MEXICO |
| 528505           | Alhakim Mazin                          | Principal Investigator           | MD                     | EB Flevoresearch<br>Louis Armstrongweg 78<br>Almere<br>1311 RL<br>NETHERLANDS                                                  |

\*CV provided as attachment to this appendix for all principal investigators

*Ensure that the printed copy of this document is the current version available on the Intranet.*

Property of the Sanofi Group - strictly confidential

Version Number: 4.0

28-JUL-2015



# SUPPLEMENTARY DATA

LIST OF PRINCIPAL INVESTIGATOR(S) AND SUB-INVESTIGATOR(S) PER STUDY SITE WHERE PATIENTS WERE ENROLLED

QSD-002219

Page 46 of 218

|                      |                |                    |          |
|----------------------|----------------|--------------------|----------|
| <b>Product Code:</b> | HOE901/AVE0010 | <b>Study Code:</b> | EFC12405 |
|----------------------|----------------|--------------------|----------|

| Study Center No. | Investigator last name and first name* | Role in the Investigation        | Professional Degree(s) | Institutional Affiliation(s)                                                                                                       |
|------------------|----------------------------------------|----------------------------------|------------------------|------------------------------------------------------------------------------------------------------------------------------------|
| 528505           | Koppeschaar Hans                       | Sub-Investigator/Co-Investigator | MD, PhD                | EB Flevoresearch<br>Louis Armstrongweg 78<br>Almere<br>1311 RL<br>NETHERLANDS                                                      |
| 528505           | Veenendaal Aletha                      | Sub-Investigator/Co-Investigator | MD                     | EB Flevoresearch<br>Louis Armstrongweg 78<br>Almere<br>1311 RL<br>NETHERLANDS                                                      |
| 616501           | Franek Edward                          | Sub-Investigator/Co-Investigator | MD, PhD                | Centrum Diabetologiczne, CSK MSW<br>Endokrynologii i Diabetologii<br>ul.Woloska 137<br>Warszawa<br>02-507<br>Mazowieckie<br>POLAND |
| 616501           | Jedynasty Krystyna                     | Principal Investigator           | MD PhD                 | Centrum Diabetologiczne, CSK MSW<br>Endokrynologii i Diabetologii<br>ul.Woloska 137<br>Warszawa<br>02-507<br>Mazowieckie<br>POLAND |

\*CV provided as attachment to this appendix for all principal investigators

*Ensure that the printed copy of this document is the current version available on the Intranet.*

Property of the Sanofi Group - strictly confidential

Version Number: 4.0

28-JUL-2015

# SUPPLEMENTARY DATA

LIST OF PRINCIPAL INVESTIGATOR(S) AND SUB-INVESTIGATOR(S) PER STUDY SITE WHERE PATIENTS WERE ENROLLED

QSD-002219

Page 47 of 218

|                      |                |                    |          |
|----------------------|----------------|--------------------|----------|
| <b>Product Code:</b> | HOE901/AVE0010 | <b>Study Code:</b> | EFC12405 |
|----------------------|----------------|--------------------|----------|

| Study Center No. | Investigator last name and first name* | Role in the Investigation        | Professional Degree(s) | Institutional Affiliation(s)                                                                                                         |
|------------------|----------------------------------------|----------------------------------|------------------------|--------------------------------------------------------------------------------------------------------------------------------------|
| 616501           | Lominska Teresa                        | Sub-Investigator/Co-Investigator | MD                     | Centrum Diabetologiczne, CSK MSW<br>Endokrynologii i Diabetologii<br>ul.Woloska 137<br>Warszawa<br>02-507<br>Mazowieckie<br>POLAND   |
| 616502           | Arciszewska Malgorzata                 | Principal Investigator           | MD, PhD                | NZOZ Specjalistyczny Ośrodek Internistyczno-<br>Diabetologiczny<br>Ul. Zamenhofa 10-20<br>Białystok<br>15-435<br>Podlaskie<br>POLAND |
| 616502           | Peczynska Jadwiga                      | Sub-Investigator/Co-Investigator | MD, PhD                | NZOZ Specjalistyczny Ośrodek Internistyczno-<br>Diabetologiczny<br>Ul. Zamenhofa 10-20<br>Białystok<br>15-435<br>Podlaskie<br>POLAND |

\*CV provided as attachment to this appendix for all principal investigators

*Ensure that the printed copy of this document is the current version available on the Intranet.*

Property of the Sanofi Group - strictly confidential

Version Number: 4.0

28-JUL-2015

# SUPPLEMENTARY DATA

LIST OF PRINCIPAL INVESTIGATOR(S) AND SUB-INVESTIGATOR(S) PER STUDY SITE WHERE PATIENTS WERE ENROLLED

QSD-002219

Page 48 of 218

|                      |                |                    |          |
|----------------------|----------------|--------------------|----------|
| <b>Product Code:</b> | HOE901/AVE0010 | <b>Study Code:</b> | EFC12405 |
|----------------------|----------------|--------------------|----------|

| Study Center No. | Investigator last name and first name* | Role in the Investigation        | Professional Degree(s) | Institutional Affiliation(s)                                                                                                       |
|------------------|----------------------------------------|----------------------------------|------------------------|------------------------------------------------------------------------------------------------------------------------------------|
| 616502           | Swierszcz Teresa                       | Sub-Investigator/Co-Investigator | MD                     | NZOZ Specjalistyczny Ośrodek Internistyczno-Diabetologiczny<br>Ul. Zamenhofska 10-20<br>Białystok<br>15-435<br>Podlaskie<br>POLAND |
| 616503           | Dudek Anna                             | Sub-Investigator/Co-Investigator | MD                     | Centrum Medyczne AMED<br>ul. Gen. Józefa Zajaczkę 9B lokal U1<br>Warszawa<br>01-518<br>Mazowieckie<br>POLAND                       |
| 616503           | Jusiak Katarzyna                       | Principal Investigator           | MD                     | Centrum Medyczne AMED<br>ul. Gen. Józefa Zajaczkę 9B lokal U1<br>Warszawa<br>01-518<br>Mazowieckie<br>POLAND                       |
| 616504           | Gromniak Elwira                        | Principal Investigator           | MD PhD                 | Indywidualna Specjalistyczna Praktyka Lekarska<br>ul. T. Starzyńskiego 2<br>Szczecin<br>70-506<br>Zachodniopomorskie<br>POLAND     |

\*CV provided as attachment to this appendix for all principal investigators

*Ensure that the printed copy of this document is the current version available on the Intranet.*

Property of the Sanofi Group - strictly confidential

Version Number: 4.0

28-JUL-2015

# SUPPLEMENTARY DATA

LIST OF PRINCIPAL INVESTIGATOR(S) AND SUB-INVESTIGATOR(S) PER STUDY SITE WHERE PATIENTS WERE ENROLLED

QSD-002219

Page 49 of 218

|                      |                |                    |          |
|----------------------|----------------|--------------------|----------|
| <b>Product Code:</b> | HOE901/AVE0010 | <b>Study Code:</b> | EFC12405 |
|----------------------|----------------|--------------------|----------|

| Study Center No. | Investigator last name and first name* | Role in the Investigation        | Professional Degree(s) | Institutional Affiliation(s)                                                                                                   |
|------------------|----------------------------------------|----------------------------------|------------------------|--------------------------------------------------------------------------------------------------------------------------------|
| 616504           | Holda Ewa                              | Sub-Investigator/Co-Investigator | MD                     | Indywidualna Specjalistyczna Praktyka Lekarska<br>ul. T. Starzynskiego 2<br>Szczecin<br>70-506<br>Zachodniopomorskie<br>POLAND |
| 616504           | Wolny Malgorzata                       | Sub-Investigator/Co-Investigator | MD                     | Indywidualna Specjalistyczna Praktyka Lekarska<br>ul. T. Starzynskiego 2<br>Szczecin<br>70-506<br>Zachodniopomorskie<br>POLAND |
| 616505           | Fedor-Plenkowska Grazyna               | Sub-Investigator/Co-Investigator | MD                     | Medyczne Centrum Diabetologiczno-<br>Endokrynologiczno-<br>ul. Rusznikarska 17<br>Krakow<br>31-261<br>Malopolskie<br>POLAND    |
| 616505           | Mirocka Joanna                         | Sub-Investigator/Co-Investigator | MD                     | Medyczne Centrum Diabetologiczno-<br>Endokrynologiczno-<br>ul. Rusznikarska 17<br>Krakow<br>31-261<br>Malopolskie<br>POLAND    |

\*CV provided as attachment to this appendix for all principal investigators

*Ensure that the printed copy of this document is the current version available on the Intranet.*

Property of the Sanofi Group - strictly confidential

Version Number: 4.0

28-JUL-2015

# SUPPLEMENTARY DATA

LIST OF PRINCIPAL INVESTIGATOR(S) AND SUB-INVESTIGATOR(S) PER STUDY SITE WHERE PATIENTS WERE ENROLLED

QSD-002219

Page 50 of 218

|                      |                |                    |          |
|----------------------|----------------|--------------------|----------|
| <b>Product Code:</b> | HOE901/AVE0010 | <b>Study Code:</b> | EFC12405 |
|----------------------|----------------|--------------------|----------|

| Study Center No. | Investigator last name and first name* | Role in the Investigation        | Professional Degree(s) | Institutional Affiliation(s)                                                                                        |
|------------------|----------------------------------------|----------------------------------|------------------------|---------------------------------------------------------------------------------------------------------------------|
| 616505           | Plinta Maria                           | Sub-Investigator/Co-Investigator | MD                     | Medyczne Centrum Diabetologiczno-Endokrynologiczno-ul. Rusznikarska 17<br>Krakow<br>31-261<br>Malopolskie<br>POLAND |
| 616505           | Stankiewicz Andrzej                    | Principal Investigator           | MD                     | Medyczne Centrum Diabetologiczno-Endokrynologiczno-ul. Rusznikarska 17<br>Krakow<br>31-261<br>Malopolskie<br>POLAND |
| 616505           | Zuradzka-Wajda Dorota                  | Sub-Investigator/Co-Investigator | MD                     | Medyczne Centrum Diabetologiczno-Endokrynologiczno-ul. Rusznikarska 17<br>Krakow<br>31-261<br>Malopolskie<br>POLAND |

\*CV provided as attachment to this appendix for all principal investigators

*Ensure that the printed copy of this document is the current version available on the Intranet.*

Property of the Sanofi Group - strictly confidential

Version Number: 4.0

28-JUL-2015

# SUPPLEMENTARY DATA

LIST OF PRINCIPAL INVESTIGATOR(S) AND SUB-INVESTIGATOR(S) PER STUDY SITE WHERE PATIENTS WERE ENROLLED

QSD-002219

Page 51 of 218

|                      |                |                    |          |
|----------------------|----------------|--------------------|----------|
| <b>Product Code:</b> | HOE901/AVE0010 | <b>Study Code:</b> | EFC12405 |
|----------------------|----------------|--------------------|----------|

| Study Center No. | Investigator last name and first name* | Role in the Investigation        | Professional Degree(s) | Institutional Affiliation(s)                                                                                                             |
|------------------|----------------------------------------|----------------------------------|------------------------|------------------------------------------------------------------------------------------------------------------------------------------|
| 616506           | Cieslik Grazyna                        | Principal Investigator           | MD, PhD                | Osrodek Leczenia Schorzen Cywilizacyjnych<br>Al. Pokoju 4<br>Zespól Poradni Specjalistyczny<br>Krakow<br>31-548<br>Malopolskie<br>POLAND |
| 616506           | Cieslik Karolina                       | Sub-Investigator/Co-Investigator | MD                     | Osrodek Leczenia Schorzen Cywilizacyjnych<br>Al. Pokoju 4<br>Zespól Poradni Specjalistyczny<br>Krakow<br>31-548<br>Malopolskie<br>POLAND |
| 616507           | Wcislo Barbara                         | Sub-Investigator/Co-Investigator | MD                     | MediDiab B Wcislo M Wojciechowska Sp Jawna<br>Ul. Otolinska 18 / F<br>Plock<br>09-400<br>Mazowieckie<br>POLAND                           |
| 616507           | Wojciechowska Malgorzata               | Principal Investigator           | MD                     | MediDiab B Wcislo M Wojciechowska Sp Jawna<br>Ul. Otolinska 18 / F<br>Plock<br>09-400<br>Mazowieckie<br>POLAND                           |

\*CV provided as attachment to this appendix for all principal investigators

*Ensure that the printed copy of this document is the current version available on the Intranet.*

Property of the Sanofi Group - strictly confidential

Version Number: 4.0

28-JUL-2015

# SUPPLEMENTARY DATA

LIST OF PRINCIPAL INVESTIGATOR(S) AND SUB-INVESTIGATOR(S) PER STUDY SITE WHERE PATIENTS WERE ENROLLED

QSD-002219

Page 52 of 218

|                      |                |                    |          |
|----------------------|----------------|--------------------|----------|
| <b>Product Code:</b> | HOE901/AVE0010 | <b>Study Code:</b> | EFC12405 |
|----------------------|----------------|--------------------|----------|

| Study Center No. | Investigator last name and first name* | Role in the Investigation        | Professional Degree(s) | Institutional Affiliation(s)                                                                                                      |
|------------------|----------------------------------------|----------------------------------|------------------------|-----------------------------------------------------------------------------------------------------------------------------------|
| 642501           | Cif Adriana                            | Principal Investigator           | MD                     | MEDIAB SRL<br>Str. Prof. Dr. Gheorghe Marinescu nr 8A, I-II<br>Targu Mures<br>540142<br>ROMANIA                                   |
| 642501           | Suciu Mirela                           | Sub-Investigator/Co-Investigator | MD                     | MEDIAB SRL<br>Dr. Gheorghe Marinescu nr 8A, I-II<br>Targu Mures<br>540142<br>ROMANIA                                              |
| 642501           | Vicsi Ildiko                           | Sub-Investigator/Co-Investigator | MD                     | MEDIAB SRL<br>Str. Prof. Dr. Gheorghe Marinescu nr 8A, I-II<br>Targu Mures<br>540142<br>ROMANIA                                   |
| 642502           | Onaca Adriana                          | Principal Investigator           | MD                     | Policlinica Pelican<br>Diabetes Nutrition and Metabolic Diseases<br>2 Corneliu Coposu Street, 410469<br>Oradea - Bihor<br>ROMANIA |
| 642502           | Onaca Mircea                           | Sub-Investigator/Co-Investigator | MD                     | Policlinica Pelican<br>Diabetes Nutrition and Metabolic Diseases<br>2 Corneliu Coposu Street, 410469<br>Oradea - Bihor<br>ROMANIA |

\*CV provided as attachment to this appendix for all principal investigators

*Ensure that the printed copy of this document is the current version available on the Intranet.*

Property of the Sanofi Group - strictly confidential

Version Number: 4.0

28-JUL-2015

# SUPPLEMENTARY DATA

LIST OF PRINCIPAL INVESTIGATOR(S) AND SUB-INVESTIGATOR(S) PER STUDY SITE WHERE PATIENTS WERE ENROLLED

QSD-002219

Page 53 of 218

|                      |                |                    |          |
|----------------------|----------------|--------------------|----------|
| <b>Product Code:</b> | HOE901/AVE0010 | <b>Study Code:</b> | EFC12405 |
|----------------------|----------------|--------------------|----------|

| Study Center No. | Investigator last name and first name* | Role in the Investigation        | Professional Degree(s) | Institutional Affiliation(s)                                                                                     |
|------------------|----------------------------------------|----------------------------------|------------------------|------------------------------------------------------------------------------------------------------------------|
| 642503           | Geru Polina                            | Sub-Investigator/Co-Investigator | MD                     | Centrul Medical "dr Negrisanu" SRL<br>Str. Transilvaniei, Nr. 7, Bl. A25, Ap.3<br>Timisoara<br>300456<br>ROMANIA |
| 642503           | Moica Andreea                          | Sub-Investigator/Co-Investigator | MD                     | Centrul Medical "dr Negrisanu" SRL<br>Str. Transilvaniei, Nr. 7, Bl. A25, Ap.3<br>Timisoara<br>300456<br>ROMANIA |
| 642503           | Negrisanu Gabriela                     | Principal Investigator           | MD                     | Centrul Medical "dr Negrisanu" SRL<br>Str. Transilvaniei, Nr. 7, Bl. A25, Ap.3<br>Timisoara<br>300456<br>ROMANIA |
| 642503           | Viruzab Maria                          | Sub-Investigator/Co-Investigator | MD                     | Centrul Medical "dr Negrisanu" SRL<br>Str. Transilvaniei, Nr. 7, Bl. A25, Ap.3<br>Timisoara<br>300456<br>ROMANIA |
| 642504           | Ionutiu Lavinia                        | Sub-Investigator/Co-Investigator | MD                     | Centrul Medical Sf. Stefan SRL<br>Strada Samuil Micu nr 9<br>Timisoara<br>300125<br>ROMANIA                      |

\*CV provided as attachment to this appendix for all principal investigators

*Ensure that the printed copy of this document is the current version available on the Intranet.*

Property of the Sanofi Group - strictly confidential

Version Number: 4.0

28-JUL-2015



# SUPPLEMENTARY DATA

LIST OF PRINCIPAL INVESTIGATOR(S) AND SUB-INVESTIGATOR(S) PER STUDY SITE WHERE PATIENTS WERE ENROLLED

QSD-002219

Page 54 of 218

|                      |                |                    |          |
|----------------------|----------------|--------------------|----------|
| <b>Product Code:</b> | HOE901/AVE0010 | <b>Study Code:</b> | EFC12405 |
|----------------------|----------------|--------------------|----------|

| Study Center No. | Investigator last name and first name* | Role in the Investigation        | Professional Degree(s) | Institutional Affiliation(s)                                                                          |
|------------------|----------------------------------------|----------------------------------|------------------------|-------------------------------------------------------------------------------------------------------|
| 642504           | Munteanu Mircea                        | Principal Investigator           | MD                     | Centrul Medical Sf. Stefan SRL<br>Strada Samuil Micu nr 9<br>Timisoara<br>300125<br>ROMANIA           |
| 642504           | Sabo Patricia                          | Sub-Investigator/Co-Investigator | MD                     | Centrul Medical Sf. Stefan SRL<br>Strada Samuil Micu nr 9<br>Timisoara<br>300125<br>ROMANIA           |
| 642505           | Busuioc-Witowski Dan                   | Sub-Investigator/Co-Investigator | MD                     | Consultmed Medical Center<br>70 Pacurari Street<br>bl. 550, ground floor<br>Iasi<br>700547<br>ROMANIA |
| 642505           | Nistor Laura                           | Sub-Investigator/Co-Investigator | MD                     | Consultmed Medical Center<br>70 Pacurari Street<br>bl. 550, ground floor<br>Iasi<br>700547<br>ROMANIA |

\*CV provided as attachment to this appendix for all principal investigators

*Ensure that the printed copy of this document is the current version available on the Intranet.*

Property of the Sanofi Group - strictly confidential

Version Number: 4.0

28-JUL-2015

# SUPPLEMENTARY DATA

LIST OF PRINCIPAL INVESTIGATOR(S) AND SUB-INVESTIGATOR(S) PER STUDY SITE WHERE PATIENTS WERE ENROLLED

QSD-002219

Page 55 of 218

|                      |                |                    |          |
|----------------------|----------------|--------------------|----------|
| <b>Product Code:</b> | HOE901/AVE0010 | <b>Study Code:</b> | EFC12405 |
|----------------------|----------------|--------------------|----------|

| Study Center No. | Investigator last name and first name* | Role in the Investigation        | Professional Degree(s) | Institutional Affiliation(s)                                                                          |
|------------------|----------------------------------------|----------------------------------|------------------------|-------------------------------------------------------------------------------------------------------|
| 642505           | Pintilei Ella                          | Principal Investigator           | MD                     | Consultmed Medical Center<br>70 Pacurari Street<br>bl. 550, ground floor<br>Iasi<br>700547<br>ROMANIA |
| 642505           | Reurean-Pintilei Delia                 | Sub-Investigator/Co-Investigator | MD                     | Consultmed Medical Center<br>70 Pacurari Street<br>bl. 550, ground floor<br>Iasi<br>700547<br>ROMANIA |
| 642506           | Pavel Mioara                           | Principal Investigator           | MD                     | "Dr.Al.Simionescu" Municipal Hospital<br>Str. Victoriei nr 14<br>Hunedoara<br>331057<br>ROMANIA       |
| 642506           | Radu Irina                             | Sub-Investigator/Co-Investigator | MD                     | "Dr.Al.Simionescu" Municipal Hospital<br>Str. Victoriei nr 14<br>Hunedoara<br>331057<br>ROMANIA       |

\*CV provided as attachment to this appendix for all principal investigators

*Ensure that the printed copy of this document is the current version available on the Intranet.*

Property of the Sanofi Group - strictly confidential

Version Number: 4.0

28-JUL-2015

# SUPPLEMENTARY DATA

LIST OF PRINCIPAL INVESTIGATOR(S) AND SUB-INVESTIGATOR(S) PER STUDY SITE WHERE PATIENTS WERE ENROLLED

QSD-002219

Page 56 of 218

|                      |                |                    |          |
|----------------------|----------------|--------------------|----------|
| <b>Product Code:</b> | HOE901/AVE0010 | <b>Study Code:</b> | EFC12405 |
|----------------------|----------------|--------------------|----------|

| Study Center No. | Investigator last name and first name* | Role in the Investigation        | Professional Degree(s) | Institutional Affiliation(s)                                                          |
|------------------|----------------------------------------|----------------------------------|------------------------|---------------------------------------------------------------------------------------|
| 642507           | Alexandru Carmina                      | Sub-Investigator/Co-Investigator | MD                     | SC Diabol SRL<br>62 Bucuresti Street,<br>Brasov County<br>Brasov<br>500365<br>ROMANIA |
| 642507           | Ferariu Ioana                          | Principal Investigator           | MD                     | SC Diabol SRL<br>62 Bucuresti Street,<br>Brasov County<br>Brasov<br>500365<br>ROMANIA |
| 642507           | Pop Cristina                           | Sub-Investigator/Co-Investigator | MD                     | SC Diabol SRL<br>62 Bucuresti Street,<br>Brasov County<br>Brasov<br>500365<br>ROMANIA |
| 642507           | Zarnescu Mihaela                       | Sub-Investigator/Co-Investigator | MD                     | SC Diabol SRL<br>62 Bucuresti Street,<br>Brasov County<br>Brasov<br>500365<br>ROMANIA |

\*CV provided as attachment to this appendix for all principal investigators

*Ensure that the printed copy of this document is the current version available on the Intranet.*

Property of the Sanofi Group - strictly confidential

Version Number: 4.0

28-JUL-2015

# SUPPLEMENTARY DATA

LIST OF PRINCIPAL INVESTIGATOR(S) AND SUB-INVESTIGATOR(S) PER STUDY SITE WHERE PATIENTS WERE ENROLLED

QSD-002219

Page 57 of 218

|                      |                |                    |          |
|----------------------|----------------|--------------------|----------|
| <b>Product Code:</b> | HOE901/AVE0010 | <b>Study Code:</b> | EFC12405 |
|----------------------|----------------|--------------------|----------|

| Study Center No. | Investigator last name and first name* | Role in the Investigation        | Professional Degree(s) | Institutional Affiliation(s)                                                                                                                               |
|------------------|----------------------------------------|----------------------------------|------------------------|------------------------------------------------------------------------------------------------------------------------------------------------------------|
| 642508           | Buligescu Sorin                        | Principal Investigator           | MD                     | National Institute "N Paulescu"<br>12 Caragiale street, district 2<br>Bucuresti<br>020045<br>ROMANIA                                                       |
| 642508           | Doros Rodica                           | Sub-Investigator/Co-Investigator | MD                     | National Institute "N Paulescu"<br>12 Caragiale street, district 2<br>Bucuresti<br>020045<br>ROMANIA                                                       |
| 642508           | Farcasiu Eugenia                       | Sub-Investigator/Co-Investigator | MD                     | National Institute "N Paulescu"<br>12 Caragiale street, district 2<br>Bucuresti<br>020045<br>ROMANIA                                                       |
| 642508           | Simionescu Cleo                        | Sub-Investigator/Co-Investigator | MD                     | National Institute "N Paulescu"<br>12 Caragiale street, district 2<br>Bucuresti<br>020045<br>ROMANIA                                                       |
| 642509           | Caceaune Elena                         | Principal Investigator           | MD                     | Institute "N Paulescu"<br>Diabetes Nutrition and Metabolic Diseases<br>12.I.L. Caragiale Street, District 2 (see FDA1572)<br>Bucuresti<br>20475<br>ROMANIA |

\*CV provided as attachment to this appendix for all principal investigators

*Ensure that the printed copy of this document is the current version available on the Intranet.*

Property of the Sanofi Group - strictly confidential

Version Number: 4.0

28-JUL-2015

# SUPPLEMENTARY DATA

LIST OF PRINCIPAL INVESTIGATOR(S) AND SUB-INVESTIGATOR(S) PER STUDY SITE WHERE PATIENTS WERE ENROLLED

QSD-002219

Page 58 of 218

|                      |                |                    |          |
|----------------------|----------------|--------------------|----------|
| <b>Product Code:</b> | HOE901/AVE0010 | <b>Study Code:</b> | EFC12405 |
|----------------------|----------------|--------------------|----------|

| Study Center No. | Investigator last name and first name* | Role in the Investigation        | Professional Degree(s) | Institutional Affiliation(s)                                                                                                                               |
|------------------|----------------------------------------|----------------------------------|------------------------|------------------------------------------------------------------------------------------------------------------------------------------------------------|
| 642509           | Stoica Magdalena                       | Sub-Investigator/Co-Investigator | MD                     | Institute "N Paulescu"<br>Diabetes Nutrition and Metabolic Diseases<br>12.I.L. Caragiale Street, District 2 (see FDA1572)<br>Bucuresti<br>20475<br>ROMANIA |
| 642510           | Constantin Ciprian                     | Sub-Investigator/Co-Investigator | MD                     | "Dr. Carol Davila" Central Military Emergency Univ.<br>H<br>88, Mircea Vulcanescu Street, 1st District<br>Bucharest<br>010825<br>ROMANIA                   |
| 642510           | Constantin Georgiana                   | Sub-Investigator/Co-Investigator | MD                     | "Dr. Carol Davila" Central Military Emergency Univ.<br>H<br>88, Mircea Vulcanescu Street, 1st District<br>Bucharest<br>010825<br>ROMANIA                   |
| 642510           | Ivan Sanda                             | Sub-Investigator/Co-Investigator | MD                     | "Dr. Carol Davila" Central Military Emergency Univ.<br>H<br>88, Mircea Vulcanescu Street, 1st District<br>Bucharest<br>010825<br>ROMANIA                   |

\*CV provided as attachment to this appendix for all principal investigators

*Ensure that the printed copy of this document is the current version available on the Intranet.*

Property of the Sanofi Group - strictly confidential

Version Number: 4.0

28-JUL-2015

# SUPPLEMENTARY DATA

LIST OF PRINCIPAL INVESTIGATOR(S) AND SUB-INVESTIGATOR(S) PER STUDY SITE WHERE PATIENTS WERE ENROLLED

QSD-002219

Page 59 of 218

|                      |                |                    |          |
|----------------------|----------------|--------------------|----------|
| <b>Product Code:</b> | HOE901/AVE0010 | <b>Study Code:</b> | EFC12405 |
|----------------------|----------------|--------------------|----------|

| Study Center No. | Investigator last name and first name* | Role in the Investigation        | Professional Degree(s) | Institutional Affiliation(s)                                                                                                          |
|------------------|----------------------------------------|----------------------------------|------------------------|---------------------------------------------------------------------------------------------------------------------------------------|
| 642510           | Mazilu Adina                           | Sub-Investigator/Co-Investigator | MD                     | "Dr. Carol Davila" Central Military Emergency Univ. H<br>88, Mircea Vulcanescu Street, 1st District<br>Bucharest<br>010825<br>ROMANIA |
| 642510           | Ranetti Aurelian                       | Principal Investigator           | MD                     | "Dr. Carol Davila" Central Military Emergency Univ. H<br>88, Mircea Vulcanescu Street, 1st District<br>Bucharest<br>010825<br>ROMANIA |
| 642510           | Sburlis Marinela                       | Sub-Investigator/Co-Investigator | MD                     | "Dr. Carol Davila" Central Military Emergency Univ. H<br>88, Mircea Vulcanescu Street, 1st District<br>Bucharest<br>010825<br>ROMANIA |
| 642510           | Spiroiu Cristina                       | Sub-Investigator/Co-Investigator | MD                     | "Dr. Carol Davila" Central Military Emergency Univ. H<br>88, Mircea Vulcanescu Street, 1st District<br>Bucharest<br>010825<br>ROMANIA |

\*CV provided as attachment to this appendix for all principal investigators

*Ensure that the printed copy of this document is the current version available on the Intranet.*

Property of the Sanofi Group - strictly confidential

Version Number: 4.0

28-JUL-2015

# SUPPLEMENTARY DATA

LIST OF PRINCIPAL INVESTIGATOR(S) AND SUB-INVESTIGATOR(S) PER STUDY SITE WHERE PATIENTS WERE ENROLLED

QSD-002219

Page 60 of 218

|                      |                |                    |          |
|----------------------|----------------|--------------------|----------|
| <b>Product Code:</b> | HOE901/AVE0010 | <b>Study Code:</b> | EFC12405 |
|----------------------|----------------|--------------------|----------|

| Study Center No. | Investigator last name and first name* | Role in the Investigation        | Professional Degree(s) | Institutional Affiliation(s)                                                                                                                |
|------------------|----------------------------------------|----------------------------------|------------------------|---------------------------------------------------------------------------------------------------------------------------------------------|
| 642511           | Mot Alina                              | Principal Investigator           | MD                     | Gensan SRL<br>Str. Grigore Alexandrescu nr. 1, Judet Sibiu<br>Sibiu<br>550371<br>ROMANIA                                                    |
| 642511           | Nicolescu Georgiana                    | Sub-Investigator/Co-Investigator | MD                     | Gensan SRL<br>Str. Grigore Alexandrescu nr. 1, Judet Sibiu<br>Sibiu<br>550371<br>ROMANIA                                                    |
| 643501           | Kuznetsova Elena                       | Sub-Investigator/Co-Investigator | MD                     | 1st Clinic of Therapy of Postgraduate of Physicians<br>n.a.Molc<br>12, Ruzovskaya str.,<br>Saint-Petersburg<br>190013<br>RUSSIAN FEDERATION |
| 643501           | Nagibovich Galina                      | Sub-Investigator/Co-Investigator | MD                     | 1st Clinic of Therapy of Postgraduate of Physicians<br>n.a.Molc<br>12, Ruzovskaya str.,<br>Saint-Petersburg<br>190013<br>RUSSIAN FEDERATION |

\*CV provided as attachment to this appendix for all principal investigators

*Ensure that the printed copy of this document is the current version available on the Intranet.*

Property of the Sanofi Group - strictly confidential

Version Number: 4.0

28-JUL-2015

# SUPPLEMENTARY DATA

LIST OF PRINCIPAL INVESTIGATOR(S) AND SUB-INVESTIGATOR(S) PER STUDY SITE WHERE PATIENTS WERE ENROLLED

QSD-002219

Page 61 of 218

|                      |                |                    |          |
|----------------------|----------------|--------------------|----------|
| <b>Product Code:</b> | HOE901/AVE0010 | <b>Study Code:</b> | EFC12405 |
|----------------------|----------------|--------------------|----------|

| Study Center No. | Investigator last name and first name* | Role in the Investigation        | Professional Degree(s) | Institutional Affiliation(s)                                                                                                                |
|------------------|----------------------------------------|----------------------------------|------------------------|---------------------------------------------------------------------------------------------------------------------------------------------|
| 643501           | Nagibovich Oleg                        | Sub-Investigator/Co-Investigator | MD, PhD                | 1st Clinic of Therapy of Postgraduate of Physicians<br>n.a.Molc<br>12, Ruzovskaya str.,<br>Saint-Petersburg<br>190013<br>RUSSIAN FEDERATION |
| 643501           | <a href="#">Shustov Sergey</a>         | Principal Investigator           | MD, PhD, Prof.         | 1st Clinic of Therapy of Postgraduate of Physicians<br>n.a.Molc<br>12, Ruzovskaya str.,<br>Saint-Petersburg<br>190013<br>RUSSIAN FEDERATION |
| 643502           | Fogt Sergey                            | Sub-Investigator/Co-Investigator | MD                     | St Elizabeth City Hospital<br>14, Vavilovskh Str.<br>St-Petersburg<br>195257<br>RUSSIAN FEDERATION                                          |
| 643502           | Malafeevskaya Olga                     | Sub-Investigator/Co-Investigator | MD                     | St Elizabeth City Hospital<br>14, Vavilovskh Str.<br>St-Petersburg<br>195257<br>RUSSIAN FEDERATION                                          |

\*CV provided as attachment to this appendix for all principal investigators

*Ensure that the printed copy of this document is the current version available on the Intranet.*

Property of the Sanofi Group - strictly confidential

Version Number: 4.0

28-JUL-2015



# SUPPLEMENTARY DATA

LIST OF PRINCIPAL INVESTIGATOR(S) AND SUB-INVESTIGATOR(S) PER STUDY SITE WHERE PATIENTS WERE ENROLLED

QSD-002219

Page 62 of 218

|                      |                |                    |          |
|----------------------|----------------|--------------------|----------|
| <b>Product Code:</b> | HOE901/AVE0010 | <b>Study Code:</b> | EFC12405 |
|----------------------|----------------|--------------------|----------|

| Study Center No. | Investigator last name and first name* | Role in the Investigation        | Professional Degree(s) | Institutional Affiliation(s)                                                                                               |
|------------------|----------------------------------------|----------------------------------|------------------------|----------------------------------------------------------------------------------------------------------------------------|
| 643502           | Mutaeva Marina                         | Sub-Investigator/Co-Investigator | MD                     | St Elizabeth City Hospital<br>14, Vavilovkykh Str.<br>St-Petersburg<br>195257<br>RUSSIAN FEDERATION                        |
| 643502           | Tishkina Anastasia                     | Sub-Investigator/Co-Investigator | MD                     | St Elizabeth City Hospital<br>14, Vavilovkykh Str.<br>St-Petersburg<br>195257<br>RUSSIAN FEDERATION                        |
| 643502           | Vorokhobina Natalia                    | Principal Investigator           | MD, PhD, Prof.         | St Elizabeth City Hospital<br>14, Vavilovkykh Str.<br>St-Petersburg<br>195257<br>RUSSIAN FEDERATION                        |
| 643503           | Bernitsina Angela                      | Sub-Investigator/Co-Investigator | MD                     | State Health institution"City Multi-field Hospital #2"<br>5, Uchebny Per.<br>St-Petersburg<br>194354<br>RUSSIAN FEDERATION |
| 643503           | Martirosjan Margarita                  | Sub-Investigator/Co-Investigator | MD                     | State Health institution"City Multi-field Hospital #2"<br>5, Uchebny Per.<br>St-Petersburg<br>194354<br>RUSSIAN FEDERATION |

\*CV provided as attachment to this appendix for all principal investigators

*Ensure that the printed copy of this document is the current version available on the Intranet.*

Property of the Sanofi Group - strictly confidential

Version Number: 4.0

28-JUL-2015

# SUPPLEMENTARY DATA

LIST OF PRINCIPAL INVESTIGATOR(S) AND SUB-INVESTIGATOR(S) PER STUDY SITE WHERE PATIENTS WERE ENROLLED

QSD-002219

Page 63 of 218

|                      |                |                    |          |
|----------------------|----------------|--------------------|----------|
| <b>Product Code:</b> | HOE901/AVE0010 | <b>Study Code:</b> | EFC12405 |
|----------------------|----------------|--------------------|----------|

| Study Center No. | Investigator last name and first name* | Role in the Investigation        | Professional Degree(s)         | Institutional Affiliation(s)                                                                                    |
|------------------|----------------------------------------|----------------------------------|--------------------------------|-----------------------------------------------------------------------------------------------------------------|
| 643503           | Orlova Valeria                         | Sub-Investigator/Co-Investigator | MD                             | State Health institution "City Multi-field Hospital #2" 5, Uchebny Per. St-Petersburg 194354 RUSSIAN FEDERATION |
| 643503           | Papaskiri Nino                         | Sub-Investigator/Co-Investigator | DrMed                          | State Health institution "City Multi-field Hospital #2" 5, Uchebny Per. St-Petersburg 194354 RUSSIAN FEDERATION |
| 643503           | Zalevskaya Alsu                        | Principal Investigator           | MD, PhD, Prof.                 | State Health institution "City Multi-field Hospital #2" 5, Uchebny Per. St-Petersburg 194354 RUSSIAN FEDERATION |
| 643504           | Astamirova Khavra                      | Sub-Investigator/Co-Investigator | MD                             | City Consultative-Diagnostic Center #1 10, Sikeirosa Str. St-Petersburg 194354 RUSSIAN FEDERATION               |
| 643504           | Karpova Irina                          | Principal Investigator           | MD, PhD, Doc. Of Med. Sciences | City Consultative-Diagnostic Center #1 10, Sikeirosa Str. St-Petersburg 194354 RUSSIAN FEDERATION               |

\*CV provided as attachment to this appendix for all principal investigators

*Ensure that the printed copy of this document is the current version available on the Intranet.*

Property of the Sanofi Group - strictly confidential

Version Number: 4.0

28-JUL-2015

# SUPPLEMENTARY DATA

LIST OF PRINCIPAL INVESTIGATOR(S) AND SUB-INVESTIGATOR(S) PER STUDY SITE WHERE PATIENTS WERE ENROLLED

QSD-002219

Page 64 of 218

|                      |                |                    |          |
|----------------------|----------------|--------------------|----------|
| <b>Product Code:</b> | HOE901/AVE0010 | <b>Study Code:</b> | EFC12405 |
|----------------------|----------------|--------------------|----------|

| Study Center No. | Investigator last name and first name* | Role in the Investigation        | Professional Degree(s) | Institutional Affiliation(s)                                                                                            |
|------------------|----------------------------------------|----------------------------------|------------------------|-------------------------------------------------------------------------------------------------------------------------|
| 643504           | Khrabrova Natalia                      | Sub-Investigator/Co-Investigator | MD                     | City Consultative-Diagnostic Center #1<br>10, Sikeirosa Str.<br>St-Petersburg<br>194354<br>RUSSIAN FEDERATION           |
| 643505           | Alpenidze Diana                        | Principal Investigator           | MD, PhD                | Municipal Multispecialty Outpatient clinic #117<br>5/1, Simonova str.<br>St. Petersburg<br>194358<br>RUSSIAN FEDERATION |
| 643505           | Kondratieva Natalia                    | Sub-Investigator/Co-Investigator | MD                     | Municipal Multispecialty Outpatient clinic #117<br>5/1, Simonova str.<br>St. Petersburg<br>194358<br>RUSSIAN FEDERATION |
| 643505           | Martjanova Maria                       | Sub-Investigator/Co-Investigator | MD                     | Municipal Multispecialty Outpatient clinic #117<br>5/1, Simonova str.<br>St. Petersburg<br>194358<br>RUSSIAN FEDERATION |
| 643505           | Nikitina Svetlana                      | Sub-Investigator/Co-Investigator | MD                     | Municipal Multispecialty Outpatient clinic #117<br>5/1, Simonova str.<br>St. Petersburg<br>194358<br>RUSSIAN FEDERATION |

\*CV provided as attachment to this appendix for all principal investigators

*Ensure that the printed copy of this document is the current version available on the Intranet.*

Property of the Sanofi Group - strictly confidential

Version Number: 4.0

28-JUL-2015

# SUPPLEMENTARY DATA

LIST OF PRINCIPAL INVESTIGATOR(S) AND SUB-INVESTIGATOR(S) PER STUDY SITE WHERE PATIENTS WERE ENROLLED

QSD-002219

Page 65 of 218

|                      |                |                    |          |
|----------------------|----------------|--------------------|----------|
| <b>Product Code:</b> | HOE901/AVE0010 | <b>Study Code:</b> | EFC12405 |
|----------------------|----------------|--------------------|----------|

| Study Center No. | Investigator last name and first name* | Role in the Investigation        | Professional Degree(s) | Institutional Affiliation(s)                                                                                            |
|------------------|----------------------------------------|----------------------------------|------------------------|-------------------------------------------------------------------------------------------------------------------------|
| 643505           | Otroshchenko Olga                      | Sub-Investigator/Co-Investigator | MD                     | Municipal Multispecialty Outpatient clinic #117<br>5/1, Simonova str.<br>St. Petersburg<br>194358<br>RUSSIAN FEDERATION |
| 643506           | Balabko Irina                          | Sub-Investigator/Co-Investigator | MD                     | Leningrad Regional Clinical Hospital<br>45-49, Lunacharskogo Prosp.<br>St-Petersburg<br>194291<br>RUSSIAN FEDERATION    |
| 643506           | Feofanova Svetlana                     | Principal Investigator           | DrMed                  | Leningrad Regional Clinical Hospital<br>45-49, Lunacharskogo Prosp.<br>St-Petersburg<br>194291<br>RUSSIAN FEDERATION    |
| 643506           | Pimenova Ekaterina                     | Sub-Investigator/Co-Investigator | MD                     | Leningrad Regional Clinical Hospital<br>45-49, Lunacharskogo Prosp.<br>St-Petersburg<br>194291<br>RUSSIAN FEDERATION    |
| 643507           | Frolova Arina                          | Sub-Investigator/Co-Investigator | MD                     | Municipal Clinical Hospital #9<br>43, Bolshaya Gornaya str.,<br>Saratov<br>410030<br>RUSSIAN FEDERATION                 |

\*CV provided as attachment to this appendix for all principal investigators

*Ensure that the printed copy of this document is the current version available on the Intranet.*

Property of the Sanofi Group - strictly confidential

Version Number: 4.0

28-JUL-2015

# SUPPLEMENTARY DATA

LIST OF PRINCIPAL INVESTIGATOR(S) AND SUB-INVESTIGATOR(S) PER STUDY SITE WHERE PATIENTS WERE ENROLLED

QSD-002219

Page 66 of 218

|                      |                |                    |          |
|----------------------|----------------|--------------------|----------|
| <b>Product Code:</b> | HOE901/AVE0010 | <b>Study Code:</b> | EFC12405 |
|----------------------|----------------|--------------------|----------|

| Study Center No. | Investigator last name and first name* | Role in the Investigation        | Professional Degree(s)      | Institutional Affiliation(s)                                                                                        |
|------------------|----------------------------------------|----------------------------------|-----------------------------|---------------------------------------------------------------------------------------------------------------------|
| 643507           | Rodionova Tatiana                      | Principal Investigator           | MD, Doc. Of Med. Sc., Prof. | Municipal Clinical Hospital #9<br>43, Bolshaya Gornaya str.,<br>Saratov<br>410030<br>RUSSIAN FEDERATION             |
| 643507           | Zinenko Anastasiya                     | Sub-Investigator/Co-Investigator | MD                          | Municipal Clinical Hospital #9<br>43, Bolshaya Gornaya str.,<br>Saratov<br>410030<br>RUSSIAN FEDERATION             |
| 643508           | Komissarova Ekaterina                  | Sub-Investigator/Co-Investigator | MD                          | Penza Regional Clinical Hospital n.a. N.N. Burdenko<br>28, Lermontova Str.<br>Penza<br>440026<br>RUSSIAN FEDERATION |
| 643508           | Samylina Irina                         | Sub-Investigator/Co-Investigator | MD                          | Penza Regional Clinical Hospital n.a. N.N. Burdenko<br>28, Lermontova Str.<br>Penza<br>440026<br>RUSSIAN FEDERATION |

\*CV provided as attachment to this appendix for all principal investigators

*Ensure that the printed copy of this document is the current version available on the Intranet.*

Property of the Sanofi Group - strictly confidential

Version Number: 4.0

28-JUL-2015

# SUPPLEMENTARY DATA

LIST OF PRINCIPAL INVESTIGATOR(S) AND SUB-INVESTIGATOR(S) PER STUDY SITE WHERE PATIENTS WERE ENROLLED

QSD-002219

Page 67 of 218

|                      |                |                    |          |
|----------------------|----------------|--------------------|----------|
| <b>Product Code:</b> | HOE901/AVE0010 | <b>Study Code:</b> | EFC12405 |
|----------------------|----------------|--------------------|----------|

| Study Center No. | Investigator last name and first name*       | Role in the Investigation        | Professional Degree(s) | Institutional Affiliation(s)                                                                                        |
|------------------|----------------------------------------------|----------------------------------|------------------------|---------------------------------------------------------------------------------------------------------------------|
| 643508           | <a href="#">Sergeeva-Kondrachenko Marina</a> | Principal Investigator           | Prof.                  | Penza Regional Clinical Hospital n.a. N.N. Burdenko<br>28, Lermontova Str.<br>Penza<br>440026<br>RUSSIAN FEDERATION |
| 643508           | Shimokhina Olga                              | Sub-Investigator/Co-Investigator | MD                     | Penza Regional Clinical Hospital n.a. N.N. Burdenko<br>28, Lermontova Str.<br>Penza<br>440026<br>RUSSIAN FEDERATION |
| 643509           | Filatova Olga                                | Sub-Investigator/Co-Investigator | MD                     | Voronezh Regional Clinical Diagnostic Centre<br>Lenina Sq., 5a<br>Voronezh<br>394018<br>RUSSIAN FEDERATION          |
| 643509           | Taginceva Natalia                            | Sub-Investigator/Co-Investigator | MD                     | Voronezh Regional Clinical Diagnostic Centre<br>Lenina Sq., 5a<br>Voronezh<br>394018<br>RUSSIAN FEDERATION          |

\*CV provided as attachment to this appendix for all principal investigators

*Ensure that the printed copy of this document is the current version available on the Intranet.*

Property of the Sanofi Group - strictly confidential

Version Number: 4.0

28-JUL-2015

# SUPPLEMENTARY DATA

LIST OF PRINCIPAL INVESTIGATOR(S) AND SUB-INVESTIGATOR(S) PER STUDY SITE WHERE PATIENTS WERE ENROLLED

QSD-002219

Page 68 of 218

|                      |                |                    |          |
|----------------------|----------------|--------------------|----------|
| <b>Product Code:</b> | HOE901/AVE0010 | <b>Study Code:</b> | EFC12405 |
|----------------------|----------------|--------------------|----------|

| Study Center No. | Investigator last name and first name* | Role in the Investigation        | Professional Degree(s) | Institutional Affiliation(s)                                                                                      |
|------------------|----------------------------------------|----------------------------------|------------------------|-------------------------------------------------------------------------------------------------------------------|
| 643509           | Zhdanova Elena                         | Principal Investigator           | PhD                    | Voronezh Regional Clinical Diagnostic Centre<br>Lenina Sq., 5a<br>Voronezh<br>394018<br>RUSSIAN FEDERATION        |
| 643511           | Kozachuk Dina                          | Sub-Investigator/Co-Investigator | MD                     | Arkhangelsk regional clinical hospital<br>292, prospekt Lomonosova<br>Arkhangelsk<br>163045<br>RUSSIAN FEDERATION |
| 643511           | Rogaleva Angelika                      | Sub-Investigator/Co-Investigator | MD                     | Arkhangelsk regional clinical hospital<br>292, prospekt Lomonosova<br>Arkhangelsk<br>163045<br>RUSSIAN FEDERATION |
| 643511           | Startseva Maria                        | Principal Investigator           | MD                     | Arkhangelsk regional clinical hospital<br>292, prospekt Lomonosova<br>Arkhangelsk<br>163045<br>RUSSIAN FEDERATION |
| 643512           | Dzigua Tamaz                           | Sub-Investigator/Co-Investigator | MD                     | University clinic of 1-st university<br>1/1, Pogodinskaya str.<br>Moscow<br>119992<br>RUSSIAN FEDERATION          |

\*CV provided as attachment to this appendix for all principal investigators

*Ensure that the printed copy of this document is the current version available on the Intranet.*

Property of the Sanofi Group - strictly confidential

Version Number: 4.0

28-JUL-2015

# SUPPLEMENTARY DATA

LIST OF PRINCIPAL INVESTIGATOR(S) AND SUB-INVESTIGATOR(S) PER STUDY SITE WHERE PATIENTS WERE ENROLLED

QSD-002219

Page 69 of 218

|                      |                |                    |          |
|----------------------|----------------|--------------------|----------|
| <b>Product Code:</b> | HOE901/AVE0010 | <b>Study Code:</b> | EFC12405 |
|----------------------|----------------|--------------------|----------|

| Study Center No. | Investigator last name and first name* | Role in the Investigation        | Professional Degree(s) | Institutional Affiliation(s)                                                                             |
|------------------|----------------------------------------|----------------------------------|------------------------|----------------------------------------------------------------------------------------------------------|
| 643512           | Kalashnikova Marina                    | Principal Investigator           | Prof.                  | University clinic of 1-st university<br>1/1, Pogodinskaya str.<br>Moscow<br>119992<br>RUSSIAN FEDERATION |
| 643512           | Likhodey Natalia                       | Sub-Investigator/Co-Investigator | MD                     | University clinic of 1-st university<br>1/1, Pogodinskaya str.<br>Moscow<br>119992<br>RUSSIAN FEDERATION |
| 643512           | Sorkina Ekaterina                      | Sub-Investigator/Co-Investigator | MD                     | University clinic of 1-st university<br>1/1, Pogodinskaya str.<br>Moscow<br>119992<br>RUSSIAN FEDERATION |
| 643512           | Sych Yulia                             | Sub-Investigator/Co-Investigator | DrMed                  | University clinic of 1-st university<br>1/1, Pogodinskaya str.<br>Moscow<br>119992<br>RUSSIAN FEDERATION |
| 643513           | Barabanova Natalia                     | Sub-Investigator/Co-Investigator | MD                     | Diabetes Center<br>165, Samarskaya str<br>Samara<br>443041<br>RUSSIAN FEDERATION                         |

\*CV provided as attachment to this appendix for all principal investigators

*Ensure that the printed copy of this document is the current version available on the Intranet.*

Property of the Sanofi Group - strictly confidential

Version Number: 4.0

28-JUL-2015



# SUPPLEMENTARY DATA

LIST OF PRINCIPAL INVESTIGATOR(S) AND SUB-INVESTIGATOR(S) PER STUDY SITE WHERE PATIENTS WERE ENROLLED

QSD-002219

Page 70 of 218

|                      |                |                    |          |
|----------------------|----------------|--------------------|----------|
| <b>Product Code:</b> | HOE901/AVE0010 | <b>Study Code:</b> | EFC12405 |
|----------------------|----------------|--------------------|----------|

| Study Center No. | Investigator last name and first name* | Role in the Investigation        | Professional Degree(s)            | Institutional Affiliation(s)                                                                    |
|------------------|----------------------------------------|----------------------------------|-----------------------------------|-------------------------------------------------------------------------------------------------|
| 643513           | Skudaev Sergey                         | Sub-Investigator/Co-Investigator | MD                                | Diabetes Center<br>165, Samarskaya str<br>Samara<br>443041<br>RUSSIAN FEDERATION                |
| 643513           | Suldina Tatiana                        | Sub-Investigator/Co-Investigator | MD                                | Diabetes Center<br>165, Samarskaya str<br>Samara<br>443041<br>RUSSIAN FEDERATION                |
| 643513           | Verbovaya Maria                        | Sub-Investigator/Co-Investigator | MD, PhD                           | Diabetes Center<br>165, Samarskaya str<br>Samara<br>443041<br>RUSSIAN FEDERATION                |
| 643513           | Verbovaya Nelly                        | Principal Investigator           | MD, PhD, Doc.of<br>Med.Sc., Prof. | Diabetes Center<br>165, Samarskaya str<br>Samara<br>443041<br>RUSSIAN FEDERATION                |
| 643514           | Gromova Svetlana                       | Sub-Investigator/Co-Investigator | MD                                | Regional Clinical Hospital<br>1, Smirnovskoe ushelie<br>Saratov<br>410053<br>RUSSIAN FEDERATION |

\*CV provided as attachment to this appendix for all principal investigators

*Ensure that the printed copy of this document is the current version available on the Intranet.*

Property of the Sanofi Group - strictly confidential

Version Number: 4.0

28-JUL-2015

# SUPPLEMENTARY DATA

LIST OF PRINCIPAL INVESTIGATOR(S) AND SUB-INVESTIGATOR(S) PER STUDY SITE WHERE PATIENTS WERE ENROLLED

QSD-002219

Page 71 of 218

|                      |                |                    |          |
|----------------------|----------------|--------------------|----------|
| <b>Product Code:</b> | HOE901/AVE0010 | <b>Study Code:</b> | EFC12405 |
|----------------------|----------------|--------------------|----------|

| Study Center No. | Investigator last name and first name* | Role in the Investigation        | Professional Degree(s) | Institutional Affiliation(s)                                                                    |
|------------------|----------------------------------------|----------------------------------|------------------------|-------------------------------------------------------------------------------------------------|
| 643514           | Kunitsyna Marina                       | Principal Investigator           | MD, PhD                | Regional Clinical Hospital<br>1, Smirnovskoe ushelie<br>Saratov<br>410053<br>RUSSIAN FEDERATION |
| 643514           | Smirnova Maria                         | Sub-Investigator/Co-Investigator | MD                     | Regional Clinical Hospital<br>1, Smirnovskoe ushelie<br>Saratov<br>410053<br>RUSSIAN FEDERATION |
| 643514           | Vinokurova Valentina                   | Sub-Investigator/Co-Investigator | MD                     | Regional Clinical Hospital<br>1, Smirnovskoe ushelie<br>Saratov<br>410053<br>RUSSIAN FEDERATION |
| 643514           | Zhukova Elena                          | Sub-Investigator/Co-Investigator | MD                     | Regional Clinical Hospital<br>1, Smirnovskoe ushelie<br>Saratov<br>410053<br>RUSSIAN FEDERATION |
| 643514           | Potapova Zhanna                        | Sub-Investigator/Co-Investigator | MD                     | Regional Clinical Hospital<br>1, Smirnovskoe ushelie<br>Saratov<br>410053<br>RUSSIAN FEDERATION |

\*CV provided as attachment to this appendix for all principal investigators

*Ensure that the printed copy of this document is the current version available on the Intranet.*

Property of the Sanofi Group - strictly confidential

Version Number: 4.0

28-JUL-2015

# SUPPLEMENTARY DATA

LIST OF PRINCIPAL INVESTIGATOR(S) AND SUB-INVESTIGATOR(S) PER STUDY SITE WHERE PATIENTS WERE ENROLLED

QSD-002219

Page 72 of 218

|                      |                |                    |          |
|----------------------|----------------|--------------------|----------|
| <b>Product Code:</b> | HOE901/AVE0010 | <b>Study Code:</b> | EFC12405 |
|----------------------|----------------|--------------------|----------|

| Study Center No. | Investigator last name and first name* | Role in the Investigation        | Professional Degree(s) | Institutional Affiliation(s)                                                                                |
|------------------|----------------------------------------|----------------------------------|------------------------|-------------------------------------------------------------------------------------------------------------|
| 703501           | Bugan Viliam                           | Sub-Investigator/Co-Investigator | MD                     | Medivasa Sro<br>Vojtecha Spanyol 8187<br>Zilina<br>01001<br>SLOVAKIA                                        |
| 703501           | Buganova Ingrid                        | Principal Investigator           | MD                     | Medivasa Sro<br>Vojtecha Spanyol 8187<br>Zilina<br>01001<br>SLOVAKIA                                        |
| 703501           | Plasil Radovan                         | Sub-Investigator/Co-Investigator | MD                     | Medivasa Sro<br>Vojtecha Spanyol 8187<br>Zilina<br>01001<br>SLOVAKIA                                        |
| 703502           | Dobosova Gabriela Cleo                 | Sub-Investigator/Co-Investigator | MD                     | Diabetologicka a metabolicka ambulancia Human-care,s.r.o.<br>Rastislavova 45<br>Kosice<br>04014<br>SLOVAKIA |

\*CV provided as attachment to this appendix for all principal investigators

*Ensure that the printed copy of this document is the current version available on the Intranet.*

Property of the Sanofi Group - strictly confidential

Version Number: 4.0

28-JUL-2015

# SUPPLEMENTARY DATA

LIST OF PRINCIPAL INVESTIGATOR(S) AND SUB-INVESTIGATOR(S) PER STUDY SITE WHERE PATIENTS WERE ENROLLED

QSD-002219

Page 73 of 218

|                      |                |                    |          |
|----------------------|----------------|--------------------|----------|
| <b>Product Code:</b> | HOE901/AVE0010 | <b>Study Code:</b> | EFC12405 |
|----------------------|----------------|--------------------|----------|

| Study Center No. | Investigator last name and first name* | Role in the Investigation        | Professional Degree(s) | Institutional Affiliation(s)                                                                                      |
|------------------|----------------------------------------|----------------------------------|------------------------|-------------------------------------------------------------------------------------------------------------------|
| 703502           | Donicova Viera                         | Principal Investigator           | DrMed                  | Diabetologicka a metabolicka ambulancia Human-care,s.r.o.<br>Rastislavova 45<br>Kosice<br>04014<br>SLOVAKIA       |
| 703504           | Ehsan Noman                            | Principal Investigator           | MD                     | Diabetologicka ambulancia NOEMIS<br>Dibrovova 26<br>Nove Mesto Nad Vahom<br>91501<br>SLOVAKIA                     |
| 703504           | Ehsanova Monika                        | Sub-Investigator/Co-Investigator | MD                     | Diabetologicka ambulancia NOEMIS<br>Dibrovova 26<br>Nove Mesto Nad Vahom<br>91501<br>SLOVAKIA                     |
| 703505           | Ilavska Adriana                        | Principal Investigator           | MD                     | Medispektrum Sro<br>Diabetologicka a metabolicka ambulancia<br>Gercenova 4 / A<br>Bratislava<br>85101<br>SLOVAKIA |

\*CV provided as attachment to this appendix for all principal investigators

*Ensure that the printed copy of this document is the current version available on the Intranet.*

Property of the Sanofi Group - strictly confidential

Version Number: 4.0

28-JUL-2015

# SUPPLEMENTARY DATA

LIST OF PRINCIPAL INVESTIGATOR(S) AND SUB-INVESTIGATOR(S) PER STUDY SITE WHERE PATIENTS WERE ENROLLED

QSD-002219

Page 74 of 218

|               |                |             |          |
|---------------|----------------|-------------|----------|
| Product Code: | HOE901/AVE0010 | Study Code: | EFC12405 |
|---------------|----------------|-------------|----------|

| Study Center No. | Investigator last name and first name* | Role in the Investigation        | Professional Degree(s) | Institutional Affiliation(s)                                                                                      |
|------------------|----------------------------------------|----------------------------------|------------------------|-------------------------------------------------------------------------------------------------------------------|
| 703505           | Kratky Adrian                          | Sub-Investigator/Co-Investigator | MD                     | Medispektrum Sro<br>Diabetologicka a metabolicka ambulancia<br>Gerdenova 4 / A<br>Bratislava<br>85101<br>SLOVAKIA |
| 703507           | Radolec Vladimir                       | Principal Investigator           | MD                     | Diabetologicka ambulancia<br>S. Sakalovej 161<br>Bytca<br>01401<br>SLOVAKIA                                       |
| 703508           | Schroner Zbynek                        | Principal Investigator           | MD, PhD                | Diabetologicka ambulancia SchronerMED, s.r.o.<br>CSA 35<br>Moldava Nad Bodvou<br>04525<br>SLOVAKIA                |
| 703508           | Schronerova Monika                     | Sub-Investigator/Co-Investigator | MD                     | Diabetologicka ambulancia SchronerMED, s.r.o.<br>CSA 35<br>Moldava Nad Bodvou<br>04525<br>SLOVAKIA                |
| 703509           | Teplanova Miriam                       | Principal Investigator           | MD                     | Diabetologicka ambulancia<br>J.Krala 3<br>Nove Zamky<br>94001<br>SLOVAKIA                                         |

\*CV provided as attachment to this appendix for all principal investigators

*Ensure that the printed copy of this document is the current version available on the Intranet.*

Property of the Sanofi Group - strictly confidential

Version Number: 4.0

28-JUL-2015

# SUPPLEMENTARY DATA

LIST OF PRINCIPAL INVESTIGATOR(S) AND SUB-INVESTIGATOR(S) PER STUDY SITE WHERE PATIENTS WERE ENROLLED

QSD-002219

Page 75 of 218

|                      |                |                    |          |
|----------------------|----------------|--------------------|----------|
| <b>Product Code:</b> | HOE901/AVE0010 | <b>Study Code:</b> | EFC12405 |
|----------------------|----------------|--------------------|----------|

| Study Center No. | Investigator last name and first name* | Role in the Investigation        | Professional Degree(s) | Institutional Affiliation(s)                                                                    |
|------------------|----------------------------------------|----------------------------------|------------------------|-------------------------------------------------------------------------------------------------|
| 703510           | Fedurco Miroslav                       | Sub-Investigator/Co-Investigator | MD                     | ENDOMED, s.r.o., Diabetologicka ambulancia<br>Americka trieda 17<br>Kosice<br>04013<br>SLOVAKIA |
| 703510           | <a href="#">Fedurcova Edita</a>        | Principal Investigator           | MD                     | ENDOMED, s.r.o., Diabetologicka ambulancia<br>Americka trieda 17<br>Kosice<br>04013<br>SLOVAKIA |
| 703511           | Dokusova Sylvia                        | Sub-Investigator/Co-Investigator | MD                     | Narodny endokrinologicky ustav<br>3491 Lubochna<br>SLOVAKIA                                     |
| 703511           | <a href="#">Martinka Emil</a>          | Principal Investigator           | MD, PhD                | Narodny endokrinologicky ustav<br>3491 Lubochna<br>SLOVAKIA                                     |
| 703511           | Samosova Jana                          | Sub-Investigator/Co-Investigator | MD                     | Narodny endokrinologicky ustav<br>3491 Lubochna<br>SLOVAKIA                                     |
| 703512           | <a href="#">Suchozova Katarina</a>     | Principal Investigator           | MD                     | Dia ambulancia<br>Komenskeho 37/A<br>Kosice<br>04001<br>SLOVAKIA                                |

\*CV provided as attachment to this appendix for all principal investigators

*Ensure that the printed copy of this document is the current version available on the Intranet.*

Property of the Sanofi Group - strictly confidential

Version Number: 4.0

28-JUL-2015

# SUPPLEMENTARY DATA

LIST OF PRINCIPAL INVESTIGATOR(S) AND SUB-INVESTIGATOR(S) PER STUDY SITE WHERE PATIENTS WERE ENROLLED

QSD-002219

Page 76 of 218

|                      |                |                    |          |
|----------------------|----------------|--------------------|----------|
| <b>Product Code:</b> | HOE901/AVE0010 | <b>Study Code:</b> | EFC12405 |
|----------------------|----------------|--------------------|----------|

| Study Center No. | Investigator last name and first name* | Role in the Investigation        | Professional Degree(s) | Institutional Affiliation(s)                                                                                                                           |
|------------------|----------------------------------------|----------------------------------|------------------------|--------------------------------------------------------------------------------------------------------------------------------------------------------|
| 703513           | Lacka Jozef                            | Principal Investigator           | DrMed,PhD,MBA          | JAL s.r.o.<br>Trhova 4<br>91701<br>Trhova<br>CZECH REPUBLIC                                                                                            |
| 703513           | Lackova Andrea                         | Sub-Investigator/Co-Investigator | MD                     | JAL s.r.o.<br>Trhova 4<br>91701<br>Trhova<br>CZECH REPUBLIC                                                                                            |
| 724501           | Capel Ismael                           | Sub-Investigator/Co-Investigator | MD                     | Corporació Sanitaria Parc Tauli<br>C/ Parc Taulí, 1<br>Serv. de endocrinologia y nutrición. Unidad de diabetes<br>08208 Sabadell<br>Barcelona<br>SPAIN |
| 724501           | Subias David                           | Principal Investigator           | MD                     | Corporació Sanitaria Parc Tauli<br>C/ Parc Taulí, 1<br>Serv. de endocrinologia y nutrición. Unidad de diabetes<br>08208 Sabadell<br>Barcelona<br>SPAIN |

\*CV provided as attachment to this appendix for all principal investigators

*Ensure that the printed copy of this document is the current version available on the Intranet.*

Property of the Sanofi Group - strictly confidential

Version Number: 4.0

28-JUL-2015

# SUPPLEMENTARY DATA

LIST OF PRINCIPAL INVESTIGATOR(S) AND SUB-INVESTIGATOR(S) PER STUDY SITE WHERE PATIENTS WERE ENROLLED

QSD-002219

Page 77 of 218

|                      |                |                    |          |
|----------------------|----------------|--------------------|----------|
| <b>Product Code:</b> | HOE901/AVE0010 | <b>Study Code:</b> | EFC12405 |
|----------------------|----------------|--------------------|----------|

| Study Center No. | Investigator last name and first name* | Role in the Investigation        | Professional Degree(s) | Institutional Affiliation(s)                                                                                                                                                          |
|------------------|----------------------------------------|----------------------------------|------------------------|---------------------------------------------------------------------------------------------------------------------------------------------------------------------------------------|
| 724502           | Ferrer Juan Carlos                     | Sub-Investigator/Co-Investigator | MD,PhD                 | Consorcio Hospital General Universitario de Valencia<br>Unidad d'Investigació Clínica<br>Consorcio Hospital General Universitario<br>Av. Tres Cruces, 2<br>Valencia<br>46014<br>SPAIN |
| 724502           | Sanchez-Juan Carlos                    | Principal Investigator           | DrMed,MD               | Consorcio Hospital General Universitario de Valencia<br>Unidad d'Investigació Clínica<br>Consorcio Hospital General Universitario<br>Av. Tres Cruces, 2<br>Valencia<br>46014<br>SPAIN |
| 724503           | Bellido Guerrero Diego                 | Principal Investigator           | DrMed                  | Hospital Naval de El Ferrol<br>Carretera San Pedro de Leixa, s/n<br>El Ferrol<br>15405<br>La Coruña<br>SPAIN                                                                          |

\*CV provided as attachment to this appendix for all principal investigators

*Ensure that the printed copy of this document is the current version available on the Intranet.*

Property of the Sanofi Group - strictly confidential

Version Number: 4.0

28-JUL-2015



# SUPPLEMENTARY DATA

LIST OF PRINCIPAL INVESTIGATOR(S) AND SUB-INVESTIGATOR(S) PER STUDY SITE WHERE PATIENTS WERE ENROLLED

QSD-002219

Page 78 of 218

|                      |                |                    |          |
|----------------------|----------------|--------------------|----------|
| <b>Product Code:</b> | HOE901/AVE0010 | <b>Study Code:</b> | EFC12405 |
|----------------------|----------------|--------------------|----------|

| Study Center No. | Investigator last name and first name* | Role in the Investigation        | Professional Degree(s) | Institutional Affiliation(s)                                                                                                        |
|------------------|----------------------------------------|----------------------------------|------------------------|-------------------------------------------------------------------------------------------------------------------------------------|
| 724503           | Cotovad Laura                          | Sub-Investigator/Co-Investigator | MD                     | Hospital Naval de El Ferrol<br>Carretera San Pedro de Leixa, s/n<br>El Ferrol<br>15405<br>La Coruña<br>SPAIN                        |
| 724503           | Tejera Perez Cristina                  | Sub-Investigator/Co-Investigator | DrMed                  | Hospital Naval de El Ferrol<br>Carretera San Pedro de Leixa, s/n<br>El Ferrol<br>15405<br>La Coruña<br>SPAIN                        |
| 724504           | Biagetti Betina                        | Sub-Investigator/Co-Investigator | MD                     | Hospital Vall d'Hebrón<br>Servicio de Endocrinología<br>Paseo Del Valle Hebrón, 119-129<br>Barcelona<br>08035<br>Barcelona<br>SPAIN |
| 724504           | Ciudin Andreea                         | Sub-Investigator/Co-Investigator | MD                     | Hospital Vall d'Hebrón<br>Servicio de Endocrinología<br>Paseo Del Valle Hebrón, 119-129<br>Barcelona<br>08035<br>Barcelona<br>SPAIN |

\*CV provided as attachment to this appendix for all principal investigators

*Ensure that the printed copy of this document is the current version available on the Intranet.*

Property of the Sanofi Group - strictly confidential

Version Number: 4.0

28-JUL-2015

# SUPPLEMENTARY DATA

LIST OF PRINCIPAL INVESTIGATOR(S) AND SUB-INVESTIGATOR(S) PER STUDY SITE WHERE PATIENTS WERE ENROLLED

QSD-002219

Page 79 of 218

|               |                |             |          |
|---------------|----------------|-------------|----------|
| Product Code: | HOE901/AVE0010 | Study Code: | EFC12405 |
|---------------|----------------|-------------|----------|

| Study Center No. | Investigator last name and first name* | Role in the Investigation        | Professional Degree(s) | Institutional Affiliation(s)                                                                                                        |
|------------------|----------------------------------------|----------------------------------|------------------------|-------------------------------------------------------------------------------------------------------------------------------------|
| 724504           | <a href="#">Simo Canonge Rafael</a>    | Principal Investigator           | DrMed                  | Hospital Vall d'Hebrón<br>Servicio de Endocrinología<br>Paseo Del Valle Hebrón, 119-129<br>Barcelona<br>08035<br>Barcelona<br>SPAIN |
| 724504           | Simó Olga                              | Sub-Investigator/Co-Investigator | MD                     | Hospital Vall d'Hebrón<br>Servicio de Endocrinología<br>Paseo Del Valle Hebrón, 119-129<br>Barcelona<br>08035<br>Barcelona<br>SPAIN |
| 724505           | Amaya María José                       | Sub-Investigator/Co-Investigator | MD                     | Hospital San Pedro de Alcántara<br>Servicio de Endocrinología<br>c/ Pablo Naranjo<br>Cáceres<br>1003<br>SPAIN                       |
| 724505           | <a href="#">Enciso Izquierdo Fidel</a> | Principal Investigator           | MD                     | Hospital San Pedro de Alcántara<br>Servicio de Endocrinología<br>c/ Pablo Naranjo<br>Cáceres<br>1003<br>SPAIN                       |

\*CV provided as attachment to this appendix for all principal investigators

*Ensure that the printed copy of this document is the current version available on the Intranet.*

Property of the Sanofi Group - strictly confidential

Version Number: 4.0

28-JUL-2015

# SUPPLEMENTARY DATA

LIST OF PRINCIPAL INVESTIGATOR(S) AND SUB-INVESTIGATOR(S) PER STUDY SITE WHERE PATIENTS WERE ENROLLED

QSD-002219

Page 80 of 218

|                      |                |                    |          |
|----------------------|----------------|--------------------|----------|
| <b>Product Code:</b> | HOE901/AVE0010 | <b>Study Code:</b> | EFC12405 |
|----------------------|----------------|--------------------|----------|

| Study Center No. | Investigator last name and first name* | Role in the Investigation        | Professional Degree(s) | Institutional Affiliation(s)                                                                                  |
|------------------|----------------------------------------|----------------------------------|------------------------|---------------------------------------------------------------------------------------------------------------|
| 724505           | Moran Lopez Jesus Manuel               | Sub-Investigator/Co-Investigator | MD                     | Hospital San Pedro de Alcántara<br>Servicio de Endocrinología<br>c/ Pablo Naranjo<br>Cáceres<br>1003<br>SPAIN |
| 724506           | Fajardo Montanana Carmen               | Sub-Investigator/Co-Investigator | DrMed                  | Hospital De La Ribera<br>Carretera De Corbera, Km. 1<br>Alzira<br>46600<br>Valencia<br>SPAIN                  |
| 724506           | Garcia Zarco Mar                       | Sub-Investigator/Co-Investigator | MD                     | Hospital De La Ribera<br>Carretera De Corbera, Km. 1<br>Alzira<br>46600<br>Valencia<br>SPAIN                  |
| 724506           | Trescoli Serrano Carlos                | Principal Investigator           | MD                     | Hospital De La Ribera<br>Carretera De Corbera, Km. 1<br>Alzira<br>46600<br>Valencia<br>SPAIN                  |

\*CV provided as attachment to this appendix for all principal investigators

*Ensure that the printed copy of this document is the current version available on the Intranet.*

Property of the Sanofi Group - strictly confidential

Version Number: 4.0

28-JUL-2015

# SUPPLEMENTARY DATA

LIST OF PRINCIPAL INVESTIGATOR(S) AND SUB-INVESTIGATOR(S) PER STUDY SITE WHERE PATIENTS WERE ENROLLED

QSD-002219

Page 81 of 218

|                      |                |                    |          |
|----------------------|----------------|--------------------|----------|
| <b>Product Code:</b> | HOE901/AVE0010 | <b>Study Code:</b> | EFC12405 |
|----------------------|----------------|--------------------|----------|

| Study Center No. | Investigator last name and first name* | Role in the Investigation        | Professional Degree(s) | Institutional Affiliation(s)                                                                                                                      |
|------------------|----------------------------------------|----------------------------------|------------------------|---------------------------------------------------------------------------------------------------------------------------------------------------|
| 724507           | Abreu Cristina                         | Sub-Investigator/Co-Investigator | MD                     | Hospital General de Segovia<br>C/ Miguel Servet, s/n<br>Segovia<br>40002<br>Segovia<br>SPAIN                                                      |
| 724507           | Castro Ramos José Carlos               | Sub-Investigator/Co-Investigator | MD                     | Hospital General de Segovia<br>C/ Miguel Servet, s/n<br>Segovia<br>40002<br>Segovia<br>SPAIN                                                      |
| 724507           | <b>Gomez-Peralta Fernando</b>          | Principal Investigator           | MD                     | Hospital General de Segovia<br>C/ Miguel Servet, s/n<br>Segovia<br>40002<br>Segovia<br>SPAIN                                                      |
| 724508           | Buno Soto Manuela                      | Sub-Investigator/Co-Investigator | MD                     | COMPLEXO HOSPITALARIO UNIVERSITARIO A<br>CORUÑA<br>Servicio de Endocrinología<br>Xubias De Arriba, 84<br>La Coruña<br>15006<br>La Coruña<br>SPAIN |

\*CV provided as attachment to this appendix for all principal investigators

*Ensure that the printed copy of this document is the current version available on the Intranet.*

Property of the Sanofi Group - strictly confidential

Version Number: 4.0

28-JUL-2015

# SUPPLEMENTARY DATA

LIST OF PRINCIPAL INVESTIGATOR(S) AND SUB-INVESTIGATOR(S) PER STUDY SITE WHERE PATIENTS WERE ENROLLED

QSD-002219

Page 82 of 218

|                      |                |                    |          |
|----------------------|----------------|--------------------|----------|
| <b>Product Code:</b> | HOE901/AVE0010 | <b>Study Code:</b> | EFC12405 |
|----------------------|----------------|--------------------|----------|

| Study Center No. | Investigator last name and first name* | Role in the Investigation        | Professional Degree(s) | Institutional Affiliation(s)                                                                                                                   |
|------------------|----------------------------------------|----------------------------------|------------------------|------------------------------------------------------------------------------------------------------------------------------------------------|
| 724508           | Ferreiro Gómez Manuel                  | Sub-Investigator/Co-Investigator | MD                     | COMPLEXO HOSPITALARIO UNIVERSITARIO A CORUÑA<br>Servicio de Endocrinología<br>Xubias De Arriba, 84<br>La Coruña<br>15006<br>La Coruña<br>SPAIN |
| 724508           | García Sara                            | Sub-Investigator/Co-Investigator | MD                     | COMPLEXO HOSPITALARIO UNIVERSITARIO A CORUÑA<br>Servicio de Endocrinología<br>Xubias De Arriba, 84<br>La Coruña<br>15006<br>La Coruña<br>SPAIN |
| 724508           | Soto Alfonso                           | Principal Investigator           | MD                     | COMPLEXO HOSPITALARIO UNIVERSITARIO A CORUÑA<br>Servicio de Endocrinología<br>Xubias De Arriba, 84<br>La Coruña<br>15006<br>La Coruña<br>SPAIN |

\*CV provided as attachment to this appendix for all principal investigators

*Ensure that the printed copy of this document is the current version available on the Intranet.*

Property of the Sanofi Group - strictly confidential

Version Number: 4.0

28-JUL-2015

# SUPPLEMENTARY DATA

LIST OF PRINCIPAL INVESTIGATOR(S) AND SUB-INVESTIGATOR(S) PER STUDY SITE WHERE PATIENTS WERE ENROLLED

QSD-002219

Page 83 of 218

|                      |                |                    |          |
|----------------------|----------------|--------------------|----------|
| <b>Product Code:</b> | HOE901/AVE0010 | <b>Study Code:</b> | EFC12405 |
|----------------------|----------------|--------------------|----------|

| Study Center No. | Investigator last name and first name* | Role in the Investigation        | Professional Degree(s) | Institutional Affiliation(s)                                                                                                                   |
|------------------|----------------------------------------|----------------------------------|------------------------|------------------------------------------------------------------------------------------------------------------------------------------------|
| 724508           | Toba Alonso Fernando                   | Sub-Investigator/Co-Investigator | MD                     | COMPLEXO HOSPITALARIO UNIVERSITARIO A CORUÑA<br>Servicio de Endocrinología<br>Xubias De Arriba, 84<br>La Coruña<br>15006<br>La Coruña<br>SPAIN |
| 724509           | Moreno Perez Oscar                     | Principal Investigator           | MD                     | Hospital General Universitario de Alicante<br>Departamento Endocrinología<br>Maestro Alonso, 109<br>Alicante<br>03010<br>Alicante<br>SPAIN     |
| 724509           | Negueruela Avella Guillermo            | Sub-Investigator/Co-Investigator | MD                     | Hospital General Universitario de Alicante<br>Departamento Endocrinología<br>Maestro Alonso, 109<br>Alicante<br>03010<br>Alicante<br>SPAIN     |

\*CV provided as attachment to this appendix for all principal investigators

*Ensure that the printed copy of this document is the current version available on the Intranet.*

Property of the Sanofi Group - strictly confidential

Version Number: 4.0

28-JUL-2015

# SUPPLEMENTARY DATA

LIST OF PRINCIPAL INVESTIGATOR(S) AND SUB-INVESTIGATOR(S) PER STUDY SITE WHERE PATIENTS WERE ENROLLED

QSD-002219

Page 84 of 218

|                      |                |                    |          |
|----------------------|----------------|--------------------|----------|
| <b>Product Code:</b> | HOE901/AVE0010 | <b>Study Code:</b> | EFC12405 |
|----------------------|----------------|--------------------|----------|

| Study Center No. | Investigator last name and first name* | Role in the Investigation        | Professional Degree(s) | Institutional Affiliation(s)                                                                                                               |
|------------------|----------------------------------------|----------------------------------|------------------------|--------------------------------------------------------------------------------------------------------------------------------------------|
| 724509           | Pico Alfonso Antonio Miguel            | Sub-Investigator/Co-Investigator | MD                     | Hospital General Universitario de Alicante<br>Departamento Endocrinología<br>Maestro Alonso, 109<br>Alicante<br>03010<br>Alicante<br>SPAIN |
| 724510           | Coves Maria Jose                       | Sub-Investigator/Co-Investigator | MD                     | Hospital Clínic i Provincial<br>Servicio de Endocrinología<br>Villarroel, 170<br>Barcelona<br>08036<br>Barcelona<br>SPAIN                  |
| 724510           | Vidal Josep                            | Principal Investigator           | MD                     | Hospital Clínic i Provincial<br>Servicio de Endocrinología<br>Villarroel, 170<br>Barcelona<br>08036<br>Barcelona<br>SPAIN                  |
| 752501           | Fabian Botond                          | Sub-Investigator/Co-Investigator | MD                     | Medicinkliniken, Ljungby lasarett<br>Medicinnottagningen<br>Ljungby Lasarett<br>34182<br>SWEDEN                                            |

\*CV provided as attachment to this appendix for all principal investigators

*Ensure that the printed copy of this document is the current version available on the Intranet.*

Property of the Sanofi Group - strictly confidential

Version Number: 4.0

28-JUL-2015

# SUPPLEMENTARY DATA

LIST OF PRINCIPAL INVESTIGATOR(S) AND SUB-INVESTIGATOR(S) PER STUDY SITE WHERE PATIENTS WERE ENROLLED

QSD-002219

Page 85 of 218

|                      |                |                    |          |
|----------------------|----------------|--------------------|----------|
| <b>Product Code:</b> | HOE901/AVE0010 | <b>Study Code:</b> | EFC12405 |
|----------------------|----------------|--------------------|----------|

| Study Center No. | Investigator last name and first name* | Role in the Investigation        | Professional Degree(s) | Institutional Affiliation(s)                                                                     |
|------------------|----------------------------------------|----------------------------------|------------------------|--------------------------------------------------------------------------------------------------|
| 752501           | Svensson Karl-Axel                     | Principal Investigator           | MD                     | Medicinkliniken, Ljungby lasarett<br>Medicinnmottagningen<br>Ljungby Lasarett<br>34182<br>SWEDEN |
| 752502           | Liu Bo                                 | Principal Investigator           | MD                     | S3 Clinical Research Centers<br>Indalsbacken 1, 2tr<br>Vällingby<br>16268<br>SWEDEN              |
| 752503           | Ericsson Ulla-Britt                    | Sub-Investigator/Co-Investigator | MD,PhD                 | Pharmasite<br>Föreningsgatan 26 3tr<br>Malmö<br>211 52<br>SWEDEN                                 |
| 752503           | Koskinen Pekka                         | Principal Investigator           | MD                     | Pharmasite<br>Föreningsgatan 26 3tr<br>Malmö<br>211 52<br>SWEDEN                                 |
| 752504           | Larnefeldt Hans                        | Principal Investigator           | MD                     | Dalecarlia Clinical Research Center<br>Torggatan 18<br>Rättvik<br>79530<br>SWEDEN                |

\*CV provided as attachment to this appendix for all principal investigators

*Ensure that the printed copy of this document is the current version available on the Intranet.*

Property of the Sanofi Group - strictly confidential

Version Number: 4.0

28-JUL-2015



# SUPPLEMENTARY DATA

LIST OF PRINCIPAL INVESTIGATOR(S) AND SUB-INVESTIGATOR(S) PER STUDY SITE WHERE PATIENTS WERE ENROLLED

QSD-002219

Page 86 of 218

|                      |                |                    |          |
|----------------------|----------------|--------------------|----------|
| <b>Product Code:</b> | HOE901/AVE0010 | <b>Study Code:</b> | EFC12405 |
|----------------------|----------------|--------------------|----------|

| Study Center No. | Investigator last name and first name* | Role in the Investigation        | Professional Degree(s) | Institutional Affiliation(s)                                                  |
|------------------|----------------------------------------|----------------------------------|------------------------|-------------------------------------------------------------------------------|
| 752505           | Bragee Bjorn                           | Principal Investigator           | MD                     | Smärtspecialistmottagningen<br>Karlavägen 100<br>Stockholm<br>11526<br>SWEDEN |
| 752505           | Lindborg Göran                         | Sub-Investigator/Co-Investigator | MD                     | Smärtspecialistmottagningen<br>Karlavägen 100<br>Stockholm<br>11526<br>SWEDEN |
| 752505           | Årfors Leopold                         | Sub-Investigator/Co-Investigator | MD                     | Smärtspecialistmottagningen<br>Karlavägen 100<br>Stockholm<br>11526<br>SWEDEN |
| 752506           | Bidner Niklas                          | Sub-Investigator/Co-Investigator | MD                     | Backa läkarhusgruppen<br>Strandvägen 23D<br>Stenungssund<br>44431<br>SWEDEN   |
| 752506           | Marin Per                              | Principal Investigator           | MD, PhD                | Backa läkarhusgruppen<br>Strandvägen 23D<br>Stenungssund<br>44431<br>SWEDEN   |

\*CV provided as attachment to this appendix for all principal investigators

*Ensure that the printed copy of this document is the current version available on the Intranet.*

Property of the Sanofi Group - strictly confidential

Version Number: 4.0

28-JUL-2015

# SUPPLEMENTARY DATA

LIST OF PRINCIPAL INVESTIGATOR(S) AND SUB-INVESTIGATOR(S) PER STUDY SITE WHERE PATIENTS WERE ENROLLED

QSD-002219

Page 87 of 218

|                      |                |                    |          |
|----------------------|----------------|--------------------|----------|
| <b>Product Code:</b> | HOE901/AVE0010 | <b>Study Code:</b> | EFC12405 |
|----------------------|----------------|--------------------|----------|

| Study Center No. | Investigator last name and first name* | Role in the Investigation        | Professional Degree(s) | Institutional Affiliation(s)                                                                                      |
|------------------|----------------------------------------|----------------------------------|------------------------|-------------------------------------------------------------------------------------------------------------------|
| 804501           | Pashkovska Nataliia                    | Principal Investigator           | MD, Prof.              | Chernivtsi regional endocrinology center<br>50, Fedkovycha Str.<br>Chernivtsi<br>58022<br>UKRAINE                 |
| 804501           | Stankova Nina                          | Sub-Investigator/Co-Investigator | MD                     | Chernivtsi regional endocrinology center<br>50, Fedkovycha Str.<br>Chernivtsi<br>58022<br>UKRAINE                 |
| 804502           | Mostovoy Yuriy                         | Principal Investigator           | MD, PhD, Prof.         | Private Small-Scale Enterprise Medical Centre<br>"Pulse"<br>34, Timiryazeva str.<br>Vinnytsya<br>21001<br>UKRAINE |
| 804502           | Motsiuk Olga                           | Sub-Investigator/Co-Investigator | MD                     | Private Small-Scale Enterprise Medical Centre<br>"Pulse"<br>34, Timiryazeva str.<br>Vinnytsya<br>21001<br>UKRAINE |

\*CV provided as attachment to this appendix for all principal investigators

*Ensure that the printed copy of this document is the current version available on the Intranet.*

Property of the Sanofi Group - strictly confidential

Version Number: 4.0

28-JUL-2015

# SUPPLEMENTARY DATA

LIST OF PRINCIPAL INVESTIGATOR(S) AND SUB-INVESTIGATOR(S) PER STUDY SITE WHERE PATIENTS WERE ENROLLED

QSD-002219

Page 88 of 218

|                      |                |                    |          |
|----------------------|----------------|--------------------|----------|
| <b>Product Code:</b> | HOE901/AVE0010 | <b>Study Code:</b> | EFC12405 |
|----------------------|----------------|--------------------|----------|

| Study Center No. | Investigator last name and first name* | Role in the Investigation        | Professional Degree(s) | Institutional Affiliation(s)                                                                                      |
|------------------|----------------------------------------|----------------------------------|------------------------|-------------------------------------------------------------------------------------------------------------------|
| 804502           | Pentiuk Nataliia                       | Sub-Investigator/Co-Investigator | MD                     | Private Small-Scale Enterprise Medical Centre "Pulse"<br>34, Timiryazeva str.<br>Vinnytsya<br>21001<br>UKRAINE    |
| 804502           | Tomashkevych Halyna                    | Sub-Investigator/Co-Investigator | MD                     | Private Small-Scale Enterprise Medical Centre "Pulse"<br>34, Timiryazeva str.<br>Vinnytsya<br>21001<br>UKRAINE    |
| 804507           | Logoida Pavlo                          | Sub-Investigator/Co-Investigator | MD                     | Administration of med services and rehabilitation of ARTEM<br>17-V, Dehtyarivska str.<br>Kyiv<br>04050<br>UKRAINE |
| 804507           | Lykhoshapko Olena                      | Sub-Investigator/Co-Investigator | MD                     | Administration of med services and rehabilitation of ARTEM<br>17-V, Dehtyarivska str.<br>Kyiv<br>04050<br>UKRAINE |

\*CV provided as attachment to this appendix for all principal investigators

*Ensure that the printed copy of this document is the current version available on the Intranet.*

Property of the Sanofi Group - strictly confidential

Version Number: 4.0

28-JUL-2015

# SUPPLEMENTARY DATA

LIST OF PRINCIPAL INVESTIGATOR(S) AND SUB-INVESTIGATOR(S) PER STUDY SITE WHERE PATIENTS WERE ENROLLED

QSD-002219

Page 89 of 218

|                      |                |                    |          |
|----------------------|----------------|--------------------|----------|
| <b>Product Code:</b> | HOE901/AVE0010 | <b>Study Code:</b> | EFC12405 |
|----------------------|----------------|--------------------|----------|

| Study Center No. | Investigator last name and first name* | Role in the Investigation        | Professional Degree(s) | Institutional Affiliation(s)                                                                                      |
|------------------|----------------------------------------|----------------------------------|------------------------|-------------------------------------------------------------------------------------------------------------------|
| 804507           | Mankovsky Borys                        | Principal Investigator           | MD, PhD, Prof.         | Administration of med services and rehabilitation of ARTEM<br>17-V, Dehtyarivska str.<br>Kyiv<br>04050<br>UKRAINE |
| 804507           | Zherdova Nadiia                        | Sub-Investigator/Co-Investigator | MD, PhD                | Administration of med services and rehabilitation of ARTEM<br>17-V, Dehtyarivska str.<br>Kyiv<br>04050<br>UKRAINE |
| 804508           | Litvinova Svitlana                     | Sub-Investigator/Co-Investigator | MD                     | Regional Clinical Highly specialized EC<br>32, Michuryna Str.<br>Vinnytsya<br>21010<br>UKRAINE                    |
| 804508           | Severyn Oksana                         | Sub-Investigator/Co-Investigator | MD                     | Regional Clinical Highly specialized EC<br>32, Michuryna Str.<br>Vinnytsya<br>21010<br>UKRAINE                    |

\*CV provided as attachment to this appendix for all principal investigators

*Ensure that the printed copy of this document is the current version available on the Intranet.*

Property of the Sanofi Group - strictly confidential

Version Number: 4.0

28-JUL-2015

# SUPPLEMENTARY DATA

LIST OF PRINCIPAL INVESTIGATOR(S) AND SUB-INVESTIGATOR(S) PER STUDY SITE WHERE PATIENTS WERE ENROLLED

QSD-002219

Page 90 of 218

|                      |                |                    |          |
|----------------------|----------------|--------------------|----------|
| <b>Product Code:</b> | HOE901/AVE0010 | <b>Study Code:</b> | EFC12405 |
|----------------------|----------------|--------------------|----------|

| Study Center No. | Investigator last name and first name* | Role in the Investigation        | Professional Degree(s) | Institutional Affiliation(s)                                                                                    |
|------------------|----------------------------------------|----------------------------------|------------------------|-----------------------------------------------------------------------------------------------------------------|
| 804508           | Vlasenko Maryna                        | Principal Investigator           | DMS, Professor         | Regional Clinical Highly specialized EC<br>32, Michuryna Str.<br>Vinnytsya<br>21010<br>UKRAINE                  |
| 804510           | Kleban Yaroslav                        | Sub-Investigator/Co-Investigator | MD                     | Railway Clinical Hospital #2 of Kyiv station DTGO<br>"SR"<br>9, Povitroflotskyy ave<br>Kyiv<br>03049<br>UKRAINE |
| 804510           | Mishanich Oleg                         | Sub-Investigator/Co-Investigator | MD                     | Railway Clinical Hospital #2 of Kyiv station DTGO<br>"SR"<br>9, Povitroflotskyy ave<br>Kyiv<br>03049<br>UKRAINE |
| 804510           | Myshanych Halyna                       | Principal Investigator           | MD, PhD                | Railway Clinical Hospital #2 of Kyiv station DTGO<br>"SR"<br>9, Povitroflotskyy ave<br>Kyiv<br>03049<br>UKRAINE |

\*CV provided as attachment to this appendix for all principal investigators

*Ensure that the printed copy of this document is the current version available on the Intranet.*

Property of the Sanofi Group - strictly confidential

Version Number: 4.0

28-JUL-2015

# SUPPLEMENTARY DATA

LIST OF PRINCIPAL INVESTIGATOR(S) AND SUB-INVESTIGATOR(S) PER STUDY SITE WHERE PATIENTS WERE ENROLLED

QSD-002219

Page 91 of 218

|                      |                |                    |          |
|----------------------|----------------|--------------------|----------|
| <b>Product Code:</b> | HOE901/AVE0010 | <b>Study Code:</b> | EFC12405 |
|----------------------|----------------|--------------------|----------|

| Study Center No. | Investigator last name and first name* | Role in the Investigation        | Professional Degree(s)         | Institutional Affiliation(s)                                                                                 |
|------------------|----------------------------------------|----------------------------------|--------------------------------|--------------------------------------------------------------------------------------------------------------|
| 804510           | Zalievskia Tetiana                     | Sub-Investigator/Co-Investigator | MD                             | Railway Clinical Hospital #2 of Kyiv station DTGO "SR"<br>9, Povitroflotskyy ave<br>Kyiv<br>03049<br>UKRAINE |
| 804511           | Ivaskiva Kateryna                      | Sub-Investigator/Co-Investigator | MD                             | Institute of endocrinology and metabolism<br>69, Vyshgorodska str<br>Kyiv 04114<br>UKRAINE                   |
| 804511           | <a href="#">Orlenko Valeriia</a>       | Principal Investigator           | PhD                            | Institute of endocrinology and metabolism<br>69, Vyshgorodska str<br>Kyiv 04114<br>UKRAINE                   |
| 804511           | Tronko Mykola                          | Sub-Investigator/Co-Investigator | MD, PhD,<br>Academician of AMS | Institute of endocrinology and metabolism<br>69, Vyshgorodska str<br>Kyiv 04114<br>UKRAINE                   |
| 804513           | <a href="#">Ablitsov Yuriy</a>         | Principal Investigator           | MD                             | Lviv Regional Endocrinology Dispensary<br>1, Ostrozkogo Str<br>Lviv<br>79010<br>UKRAINE                      |

\*CV provided as attachment to this appendix for all principal investigators

*Ensure that the printed copy of this document is the current version available on the Intranet.*

Property of the Sanofi Group - strictly confidential

Version Number: 4.0

28-JUL-2015

# SUPPLEMENTARY DATA

LIST OF PRINCIPAL INVESTIGATOR(S) AND SUB-INVESTIGATOR(S) PER STUDY SITE WHERE PATIENTS WERE ENROLLED

QSD-002219

Page 92 of 218

|                      |                |                    |          |
|----------------------|----------------|--------------------|----------|
| <b>Product Code:</b> | HOE901/AVE0010 | <b>Study Code:</b> | EFC12405 |
|----------------------|----------------|--------------------|----------|

| Study Center No. | Investigator last name and first name* | Role in the Investigation        | Professional Degree(s) | Institutional Affiliation(s)                                                                                                 |
|------------------|----------------------------------------|----------------------------------|------------------------|------------------------------------------------------------------------------------------------------------------------------|
| 804513           | Konovart Oksana                        | Sub-Investigator/Co-Investigator | MD, PhD                | Lviv Regional Endocrinology Dispensary<br>1, Ostrozkogo Str<br>Lviv<br>79010<br>UKRAINE                                      |
| 804513           | Sandurska Solomiya                     | Sub-Investigator/Co-Investigator | MD                     | Lviv Regional Endocrinology Dispensary<br>1, Ostrozkogo Str<br>Lviv<br>79010<br>UKRAINE                                      |
| 804513           | Vendzilovych Yuriy                     | Sub-Investigator/Co-Investigator | MD                     | Lviv Regional Endocrinology Dispensary<br>1, Ostrozkogo Str<br>Lviv<br>79010<br>UKRAINE                                      |
| 840501           | Arkin David                            | Sub-Investigator/Co-Investigator | MD                     | Physician's Research Associates, LLC<br>758 Old Norcorss Rd, Suite 175<br>Lawrenceville<br>30046<br>Georgia<br>UNITED STATES |

\*CV provided as attachment to this appendix for all principal investigators

*Ensure that the printed copy of this document is the current version available on the Intranet.*

Property of the Sanofi Group - strictly confidential

Version Number: 4.0

28-JUL-2015

# SUPPLEMENTARY DATA

LIST OF PRINCIPAL INVESTIGATOR(S) AND SUB-INVESTIGATOR(S) PER STUDY SITE WHERE PATIENTS WERE ENROLLED

QSD-002219

Page 93 of 218

|                      |                |                    |          |
|----------------------|----------------|--------------------|----------|
| <b>Product Code:</b> | HOE901/AVE0010 | <b>Study Code:</b> | EFC12405 |
|----------------------|----------------|--------------------|----------|

| Study Center No. | Investigator last name and first name* | Role in the Investigation        | Professional Degree(s) | Institutional Affiliation(s)                                                                                                 |
|------------------|----------------------------------------|----------------------------------|------------------------|------------------------------------------------------------------------------------------------------------------------------|
| 840501           | Goswami Ketan                          | Sub-Investigator/Co-Investigator | MD                     | Physician's Research Associates, LLC<br>758 Old Norcorss Rd, Suite 175<br>Lawrenceville<br>30046<br>Georgia<br>UNITED STATES |
| 840501           | Lu Peter                               | Sub-Investigator/Co-Investigator | MD                     | Physician's Research Associates, LLC<br>758 Old Norcorss Rd, Suite 175<br>Lawrenceville<br>30046<br>Georgia<br>UNITED STATES |
| 840501           | Mahakala Aparna                        | Sub-Investigator/Co-Investigator | MD                     | Physician's Research Associates, LLC<br>758 Old Norcorss Rd, Suite 175<br>Lawrenceville<br>30046<br>Georgia<br>UNITED STATES |
| 840501           | Odugbesan Adeniyi                      | Principal Investigator           | MD                     | Physician's Research Associates, LLC<br>758 Old Norcorss Rd, Suite 175<br>Lawrenceville<br>30046<br>Georgia<br>UNITED STATES |

\*CV provided as attachment to this appendix for all principal investigators

*Ensure that the printed copy of this document is the current version available on the Intranet.*

Property of the Sanofi Group - strictly confidential

Version Number: 4.0

28-JUL-2015



# SUPPLEMENTARY DATA

LIST OF PRINCIPAL INVESTIGATOR(S) AND SUB-INVESTIGATOR(S) PER STUDY SITE WHERE PATIENTS WERE ENROLLED

QSD-002219

Page 94 of 218

|                      |                |                    |          |
|----------------------|----------------|--------------------|----------|
| <b>Product Code:</b> | HOE901/AVE0010 | <b>Study Code:</b> | EFC12405 |
|----------------------|----------------|--------------------|----------|

| Study Center No. | Investigator last name and first name* | Role in the Investigation        | Professional Degree(s) | Institutional Affiliation(s)                                                                                                 |
|------------------|----------------------------------------|----------------------------------|------------------------|------------------------------------------------------------------------------------------------------------------------------|
| 840501           | Shore David                            | Sub-Investigator/Co-Investigator | MD                     | Physician's Research Associates, LLC<br>758 Old Norcorss Rd, Suite 175<br>Lawrenceville<br>30046<br>Georgia<br>UNITED STATES |
| 840502           | Albarracin Cesar                       | Sub-Investigator/Co-Investigator | MD                     | Padre Coast Medical Associates PA<br>1301 Santa Fe Street<br>Suite B<br>Corpus Christi<br>78404<br>Texas<br>UNITED STATES    |
| 840502           | Sandoval Jaime                         | Principal Investigator           | MD                     | Padre Coast Medical Associates PA<br>1301 Santa Fe Street<br>Suite B<br>Corpus Christi<br>78404<br>Texas<br>UNITED STATES    |
| 840503           | Daboul Nizar                           | Principal Investigator           | MD                     | Advanced Medical Research, LLC<br>6450 Wheatstone Ct.<br>Maumee<br>43537<br>Ohio<br>UNITED STATES                            |

\*CV provided as attachment to this appendix for all principal investigators

*Ensure that the printed copy of this document is the current version available on the Intranet.*

Property of the Sanofi Group - strictly confidential

Version Number: 4.0

28-JUL-2015

# SUPPLEMENTARY DATA

LIST OF PRINCIPAL INVESTIGATOR(S) AND SUB-INVESTIGATOR(S) PER STUDY SITE WHERE PATIENTS WERE ENROLLED

QSD-002219

Page 95 of 218

|                      |                |                    |          |
|----------------------|----------------|--------------------|----------|
| <b>Product Code:</b> | HOE901/AVE0010 | <b>Study Code:</b> | EFC12405 |
|----------------------|----------------|--------------------|----------|

| Study Center No. | Investigator last name and first name* | Role in the Investigation        | Professional Degree(s) | Institutional Affiliation(s)                                                                                    |
|------------------|----------------------------------------|----------------------------------|------------------------|-----------------------------------------------------------------------------------------------------------------|
| 840503           | Khamousia Nidaa                        | Sub-Investigator/Co-Investigator | MD                     | Advanced Medical Research, LLC<br>6450 Wheatstone Ct.<br>Maumee<br>43537<br>Ohio<br>UNITED STATES               |
| 840504           | Gilman Eileen                          | Sub-Investigator/Co-Investigator | CRC                    | Virginia Endocrinology Research<br>3205 Churchland Blvd.<br>Chesapeake<br>23321<br>Virginia<br>UNITED STATES    |
| 840504           | Larocque James                         | Principal Investigator           | MD                     | Virginia Endocrinology Research<br>3205 Churchland Blvd.<br>Chesapeake<br>23321<br>Virginia<br>UNITED STATES    |
| 840505           | Alzohaili Opada                        | Principal Investigator           | MD                     | Alzohaili Medical Consultants<br>1331 Monroe St.<br>Suite 100<br>Dearborn<br>48124<br>Michigan<br>UNITED STATES |

\*CV provided as attachment to this appendix for all principal investigators

*Ensure that the printed copy of this document is the current version available on the Intranet.*

Property of the Sanofi Group - strictly confidential

Version Number: 4.0

28-JUL-2015

# SUPPLEMENTARY DATA

LIST OF PRINCIPAL INVESTIGATOR(S) AND SUB-INVESTIGATOR(S) PER STUDY SITE WHERE PATIENTS WERE ENROLLED

QSD-002219

Page 96 of 218

|                      |                |                    |          |
|----------------------|----------------|--------------------|----------|
| <b>Product Code:</b> | HOE901/AVE0010 | <b>Study Code:</b> | EFC12405 |
|----------------------|----------------|--------------------|----------|

| Study Center No. | Investigator last name and first name* | Role in the Investigation        | Professional Degree(s) | Institutional Affiliation(s)                                                                                       |
|------------------|----------------------------------------|----------------------------------|------------------------|--------------------------------------------------------------------------------------------------------------------|
| 840505           | Krakauer Jesse Charles                 | Sub-Investigator/Co-Investigator | MD                     | Alzohaili Medical Consultants<br>1331 Monroe St.<br>Suite 100<br>Dearborn<br>48124<br>Michigan<br>UNITED STATES    |
| 840505           | Whelan Sheila                          | Sub-Investigator/Co-Investigator | NP, CDE                | Alzohaili Medical Consultants<br>1331 Monroe St.<br>Suite 100<br>Dearborn<br>48124<br>Michigan<br>UNITED STATES    |
| 840506           | Kuechenmeister Lisa                    | Sub-Investigator/Co-Investigator | PA-C                   | Creighton University Medical Center<br>601 N 30th St.<br>Suite 6715<br>Omaha<br>68131<br>Nebraska<br>UNITED STATES |

\*CV provided as attachment to this appendix for all principal investigators

*Ensure that the printed copy of this document is the current version available on the Intranet.*

Property of the Sanofi Group - strictly confidential

Version Number: 4.0

28-JUL-2015

# SUPPLEMENTARY DATA

LIST OF PRINCIPAL INVESTIGATOR(S) AND SUB-INVESTIGATOR(S) PER STUDY SITE WHERE PATIENTS WERE ENROLLED

QSD-002219

Page 97 of 218

|                      |                |                    |          |
|----------------------|----------------|--------------------|----------|
| <b>Product Code:</b> | HOE901/AVE0010 | <b>Study Code:</b> | EFC12405 |
|----------------------|----------------|--------------------|----------|

| Study Center No. | Investigator last name and first name* | Role in the Investigation        | Professional Degree(s) | Institutional Affiliation(s)                                                                                       |
|------------------|----------------------------------------|----------------------------------|------------------------|--------------------------------------------------------------------------------------------------------------------|
| 840506           | Minahan Erin                           | Sub-Investigator/Co-Investigator | PA-C                   | Creighton University Medical Center<br>601 N 30th St.<br>Suite 6715<br>Omaha<br>68131<br>Nebraska<br>UNITED STATES |
| 840506           | Rendell Marc                           | Principal Investigator           | MD                     | Creighton University Medical Center<br>601 N 30th St.<br>Suite 6715<br>Omaha<br>68131<br>Nebraska<br>UNITED STATES |
| 840506           | Storey Anne                            | Sub-Investigator/Co-Investigator | PA-C                   | Creighton University Medical Center<br>601 N 30th St.<br>Suite 6715<br>Omaha<br>68131<br>Nebraska<br>UNITED STATES |

\*CV provided as attachment to this appendix for all principal investigators

*Ensure that the printed copy of this document is the current version available on the Intranet.*

Property of the Sanofi Group - strictly confidential

Version Number: 4.0

28-JUL-2015

# SUPPLEMENTARY DATA

LIST OF PRINCIPAL INVESTIGATOR(S) AND SUB-INVESTIGATOR(S) PER STUDY SITE WHERE PATIENTS WERE ENROLLED

QSD-002219

Page 98 of 218

|                      |                |                    |          |
|----------------------|----------------|--------------------|----------|
| <b>Product Code:</b> | HOE901/AVE0010 | <b>Study Code:</b> | EFC12405 |
|----------------------|----------------|--------------------|----------|

| Study Center No. | Investigator last name and first name* | Role in the Investigation        | Professional Degree(s) | Institutional Affiliation(s)                                                                                                     |
|------------------|----------------------------------------|----------------------------------|------------------------|----------------------------------------------------------------------------------------------------------------------------------|
| 840507           | Toth Phillip                           | Principal Investigator           | MD                     | Midwest Institute for Clinical Research<br>8803 N Meridian St.<br>Suite 200<br>Indianapolis<br>46260<br>Indiana<br>UNITED STATES |
| 840507           | Weiser Don                             | Sub-Investigator/Co-Investigator | MD                     | Midwest Institute for Clinical Research<br>8803 N Meridian St.<br>Suite 200<br>Indianapolis<br>46260<br>Indiana<br>UNITED STATES |
| 840509           | Johnson Michael                        | Sub-Investigator/Co-Investigator | PA-C                   | Cherry Creek Family Practice<br>425 South Cherry Street<br>Suite 410<br>Denver<br>80246<br>Colorado<br>UNITED STATES             |

\*CV provided as attachment to this appendix for all principal investigators

*Ensure that the printed copy of this document is the current version available on the Intranet.*

Property of the Sanofi Group - strictly confidential

Version Number: 4.0

28-JUL-2015

# SUPPLEMENTARY DATA

LIST OF PRINCIPAL INVESTIGATOR(S) AND SUB-INVESTIGATOR(S) PER STUDY SITE WHERE PATIENTS WERE ENROLLED

QSD-002219

Page 99 of 218

|                      |                |                    |          |
|----------------------|----------------|--------------------|----------|
| <b>Product Code:</b> | HOE901/AVE0010 | <b>Study Code:</b> | EFC12405 |
|----------------------|----------------|--------------------|----------|

| Study Center No. | Investigator last name and first name* | Role in the Investigation        | Professional Degree(s) | Institutional Affiliation(s)                                                                                         |
|------------------|----------------------------------------|----------------------------------|------------------------|----------------------------------------------------------------------------------------------------------------------|
| 840509           | Kreutter Chantelle                     | Sub-Investigator/Co-Investigator | BS                     | Cherry Creek Family Practice<br>425 South Cherry Street<br>Suite 410<br>Denver<br>80246<br>Colorado<br>UNITED STATES |
| 840509           | Kreutter Flory                         | Principal Investigator           | MD                     | Cherry Creek Family Practice<br>425 South Cherry Street<br>Suite 410<br>Denver<br>80246<br>Colorado<br>UNITED STATES |
| 840509           | Schauwecker Allison                    | Sub-Investigator/Co-Investigator | MPH                    | Cherry Creek Family Practice<br>425 South Cherry Street<br>Suite 410<br>Denver<br>80246<br>Colorado<br>UNITED STATES |

\*CV provided as attachment to this appendix for all principal investigators

*Ensure that the printed copy of this document is the current version available on the Intranet.*

Property of the Sanofi Group - strictly confidential

Version Number: 4.0

28-JUL-2015

# SUPPLEMENTARY DATA

LIST OF PRINCIPAL INVESTIGATOR(S) AND SUB-INVESTIGATOR(S) PER STUDY SITE WHERE PATIENTS WERE ENROLLED

QSD-002219

Page 100 of 218

|                      |                |                    |          |
|----------------------|----------------|--------------------|----------|
| <b>Product Code:</b> | HOE901/AVE0010 | <b>Study Code:</b> | EFC12405 |
|----------------------|----------------|--------------------|----------|

| Study Center No. | Investigator last name and first name* | Role in the Investigation        | Professional Degree(s) | Institutional Affiliation(s)                                                                               |
|------------------|----------------------------------------|----------------------------------|------------------------|------------------------------------------------------------------------------------------------------------|
| 840510           | Cohen Martin                           | Sub-Investigator/Co-Investigator | MD                     | Baptist Diabetes Associates<br>7867 SW 88th Ter, Ste 80<br>Miami<br>33156-7563<br>Florida<br>UNITED STATES |
| 840510           | Estrada-Alberti Giselle                | Sub-Investigator/Co-Investigator | FMG, RN                | Baptist Diabetes Associates<br>7867 SW 88th Ter, Ste 80<br>Miami<br>33156-7563<br>Florida<br>UNITED STATES |
| 840510           | Llobet Mario                           | Sub-Investigator/Co-Investigator | CCRC                   | Baptist Diabetes Associates<br>7867 SW 88th Ter, Ste 80<br>Miami<br>33156-7563<br>Florida<br>UNITED STATES |
| 840510           | Rothberg Martin                        | Sub-Investigator/Co-Investigator | MD                     | Baptist Diabetes Associates<br>7867 SW 88th Ter, Ste 80<br>Miami<br>33156-7563<br>Florida<br>UNITED STATES |

\*CV provided as attachment to this appendix for all principal investigators

*Ensure that the printed copy of this document is the current version available on the Intranet.*

Property of the Sanofi Group - strictly confidential

Version Number: 4.0

28-JUL-2015

# SUPPLEMENTARY DATA

LIST OF PRINCIPAL INVESTIGATOR(S) AND SUB-INVESTIGATOR(S) PER STUDY SITE WHERE PATIENTS WERE ENROLLED

QSD-002219

Page 101 of 218

|                      |                |                    |          |
|----------------------|----------------|--------------------|----------|
| <b>Product Code:</b> | HOE901/AVE0010 | <b>Study Code:</b> | EFC12405 |
|----------------------|----------------|--------------------|----------|

| Study Center No. | Investigator last name and first name* | Role in the Investigation        | Professional Degree(s) | Institutional Affiliation(s)                                                                                       |
|------------------|----------------------------------------|----------------------------------|------------------------|--------------------------------------------------------------------------------------------------------------------|
| 840510           | Weissman Peter                         | Principal Investigator           | MD                     | Baptist Diabetes Associates<br>7867 SW 88th Ter, Ste 80<br>Miami<br>33156-7563<br>Florida<br>UNITED STATES         |
| 840511           | Azizad Masoud                          | Principal Investigator           | MD                     | Valley Clinical Trials, Inc.<br>18433 Roscoe Blvd. Suite 210<br>Northridge<br>91325<br>California<br>UNITED STATES |
| 840511           | Brown Monica                           | Sub-Investigator/Co-Investigator | CRC                    | Valley Clinical Trials, Inc.<br>18433 Roscoe Blvd. Suite 210<br>Northridge<br>91325<br>California<br>UNITED STATES |
| 840511           | Chow Christopher                       | Sub-Investigator/Co-Investigator | MD                     | Valley Clinical Trials, Inc.<br>18433 Roscoe Blvd. Suite 210<br>Northridge<br>91325<br>California<br>UNITED STATES |

\*CV provided as attachment to this appendix for all principal investigators

*Ensure that the printed copy of this document is the current version available on the Intranet.*

Property of the Sanofi Group - strictly confidential

Version Number: 4.0

28-JUL-2015



# SUPPLEMENTARY DATA

LIST OF PRINCIPAL INVESTIGATOR(S) AND SUB-INVESTIGATOR(S) PER STUDY SITE WHERE PATIENTS WERE ENROLLED

QSD-002219

Page 102 of 218

|                      |                |                    |          |
|----------------------|----------------|--------------------|----------|
| <b>Product Code:</b> | HOE901/AVE0010 | <b>Study Code:</b> | EFC12405 |
|----------------------|----------------|--------------------|----------|

| Study Center No. | Investigator last name and first name* | Role in the Investigation        | Professional Degree(s) | Institutional Affiliation(s)                                                                                       |
|------------------|----------------------------------------|----------------------------------|------------------------|--------------------------------------------------------------------------------------------------------------------|
| 840511           | Gutierrez Haydee                       | Sub-Investigator/Co-Investigator | MPH                    | Valley Clinical Trials, Inc.<br>18433 Roscoe Blvd. Suite 210<br>Northridge<br>91325<br>California<br>UNITED STATES |
| 840511           | Toven Julie                            | Sub-Investigator/Co-Investigator | CCRP                   | Valley Clinical Trials, Inc.<br>18433 Roscoe Blvd. Suite 210<br>Northridge<br>91325<br>California<br>UNITED STATES |
| 840512           | Kasper Joseph                          | Principal Investigator           | MD                     | Focus Clinical Trials<br>12176 South 1000 East<br>Suite 4<br>Draper<br>84020<br>Utah<br>UNITED STATES              |
| 840512           | Wright Elizabeth                       | Sub-Investigator/Co-Investigator | PA                     | Focus Clinical Trials<br>12176 South 1000 East<br>Suite 4<br>Draper<br>84020<br>Utah<br>UNITED STATES              |

\*CV provided as attachment to this appendix for all principal investigators

*Ensure that the printed copy of this document is the current version available on the Intranet.*

Property of the Sanofi Group - strictly confidential

Version Number: 4.0

28-JUL-2015

# SUPPLEMENTARY DATA

LIST OF PRINCIPAL INVESTIGATOR(S) AND SUB-INVESTIGATOR(S) PER STUDY SITE WHERE PATIENTS WERE ENROLLED

QSD-002219

Page 103 of 218

|                      |                |                    |          |
|----------------------|----------------|--------------------|----------|
| <b>Product Code:</b> | HOE901/AVE0010 | <b>Study Code:</b> | EFC12405 |
|----------------------|----------------|--------------------|----------|

| Study Center No. | Investigator last name and first name* | Role in the Investigation        | Professional Degree(s) | Institutional Affiliation(s)                                                                                        |
|------------------|----------------------------------------|----------------------------------|------------------------|---------------------------------------------------------------------------------------------------------------------|
| 840512           | Lopez Ronald                           | Sub-Investigator/Co-Investigator | MD                     | Focus Clinical Trials<br>12176 South 1000 East<br>Suite 4<br>Draper<br>84020<br>Utah<br>UNITED STATES               |
| 840513           | Ferree Kristin Gainey                  | Sub-Investigator/Co-Investigator | FNP                    | Diabetes & Endocrinology Consultants<br>611 N 35th St.<br>Morehead City<br>28557<br>North Carolina<br>UNITED STATES |
| 840513           | Lucas Kathryn                          | Principal Investigator           | MD                     | Diabetes & Endocrinology Consultants<br>611 N 35th St.<br>Morehead City<br>28557<br>North Carolina<br>UNITED STATES |
| 840514           | Camp Shana                             | Sub-Investigator/Co-Investigator | MA, CCRP               | Protenium Clinical Research<br>1725 Chadwick Court<br>Suite 200<br>Hurst<br>76054<br>Texas<br>UNITED STATES         |

\*CV provided as attachment to this appendix for all principal investigators

*Ensure that the printed copy of this document is the current version available on the Intranet.*

Property of the Sanofi Group - strictly confidential

Version Number: 4.0

28-JUL-2015

# SUPPLEMENTARY DATA

LIST OF PRINCIPAL INVESTIGATOR(S) AND SUB-INVESTIGATOR(S) PER STUDY SITE WHERE PATIENTS WERE ENROLLED

QSD-002219

Page 104 of 218

|                      |                |                    |          |
|----------------------|----------------|--------------------|----------|
| <b>Product Code:</b> | HOE901/AVE0010 | <b>Study Code:</b> | EFC12405 |
|----------------------|----------------|--------------------|----------|

| Study Center No. | Investigator last name and first name* | Role in the Investigation        | Professional Degree(s) | Institutional Affiliation(s)                                                                                |
|------------------|----------------------------------------|----------------------------------|------------------------|-------------------------------------------------------------------------------------------------------------|
| 840514           | Castro Cindy                           | Sub-Investigator/Co-Investigator | MA, CRC,               | Protenium Clinical Research<br>1725 Chadwick Court<br>Suite 200<br>Hurst<br>76054<br>Texas<br>UNITED STATES |
| 840514           | Eizensmits Christina                   | Sub-Investigator/Co-Investigator | MA, CCRP               | Protenium Clinical Research<br>1725 Chadwick Court<br>Suite 200<br>Hurst<br>76054<br>Texas<br>UNITED STATES |
| 840514           | Strzinek Robert                        | Principal Investigator           | DO, PhD                | Protenium Clinical Research<br>1725 Chadwick Court<br>Suite 200<br>Hurst<br>76054<br>Texas<br>UNITED STATES |

\*CV provided as attachment to this appendix for all principal investigators

*Ensure that the printed copy of this document is the current version available on the Intranet.*

Property of the Sanofi Group - strictly confidential

Version Number: 4.0

28-JUL-2015

# SUPPLEMENTARY DATA

LIST OF PRINCIPAL INVESTIGATOR(S) AND SUB-INVESTIGATOR(S) PER STUDY SITE WHERE PATIENTS WERE ENROLLED

QSD-002219

Page 105 of 218

|                      |                |                    |          |
|----------------------|----------------|--------------------|----------|
| <b>Product Code:</b> | HOE901/AVE0010 | <b>Study Code:</b> | EFC12405 |
|----------------------|----------------|--------------------|----------|

| Study Center No. | Investigator last name and first name* | Role in the Investigation        | Professional Degree(s) | Institutional Affiliation(s)                                                                                                    |
|------------------|----------------------------------------|----------------------------------|------------------------|---------------------------------------------------------------------------------------------------------------------------------|
| 840514           | Terry Jessica                          | Sub-Investigator/Co-Investigator | MA, CCRP               | Protenium Clinical Research<br>1725 Chadwick Court<br>Suite 200<br>Hurst<br>76054<br>Texas<br>UNITED STATES                     |
| 840514           | Toler Sara                             | Sub-Investigator/Co-Investigator | BS,MSN,RN              | Protenium Clinical Research<br>1725 Chadwick Court<br>Suite 200<br>Hurst<br>76054<br>Texas<br>UNITED STATES                     |
| 840515           | Dillard Cynthia                        | Sub-Investigator/Co-Investigator | RD, LDN                | PMG Research of Winston-Salem<br>1901 S Hawthorne Rd.<br>Suite 306<br>Winston-Salem<br>27103<br>North Carolina<br>UNITED STATES |

\*CV provided as attachment to this appendix for all principal investigators

*Ensure that the printed copy of this document is the current version available on the Intranet.*

Property of the Sanofi Group - strictly confidential

Version Number: 4.0

28-JUL-2015

# SUPPLEMENTARY DATA

LIST OF PRINCIPAL INVESTIGATOR(S) AND SUB-INVESTIGATOR(S) PER STUDY SITE WHERE PATIENTS WERE ENROLLED

QSD-002219

Page 106 of 218

|                      |                |                    |          |
|----------------------|----------------|--------------------|----------|
| <b>Product Code:</b> | HOE901/AVE0010 | <b>Study Code:</b> | EFC12405 |
|----------------------|----------------|--------------------|----------|

| Study Center No. | Investigator last name and first name* | Role in the Investigation        | Professional Degree(s) | Institutional Affiliation(s)                                                                                                    |
|------------------|----------------------------------------|----------------------------------|------------------------|---------------------------------------------------------------------------------------------------------------------------------|
| 840515           | Holmes Robert John                     | Sub-Investigator/Co-Investigator | MD                     | PMG Research of Winston-Salem<br>1901 S Hawthorne Rd.<br>Suite 306<br>Winston-Salem<br>27103<br>North Carolina<br>UNITED STATES |
| 840515           | Ingram Patsy Clayton                   | Sub-Investigator/Co-Investigator | LPN                    | PMG Research of Winston-Salem<br>1901 S Hawthorne Rd.<br>Suite 306<br>Winston-Salem<br>27103<br>North Carolina<br>UNITED STATES |
| 840515           | Smith Brian Stanley                    | Sub-Investigator/Co-Investigator | MD                     | PMG Research of Winston-Salem<br>1901 S Hawthorne Rd.<br>Suite 306<br>Winston-Salem<br>27103<br>North Carolina<br>UNITED STATES |

\*CV provided as attachment to this appendix for all principal investigators

*Ensure that the printed copy of this document is the current version available on the Intranet.*

Property of the Sanofi Group - strictly confidential

Version Number: 4.0

28-JUL-2015

# SUPPLEMENTARY DATA

LIST OF PRINCIPAL INVESTIGATOR(S) AND SUB-INVESTIGATOR(S) PER STUDY SITE WHERE PATIENTS WERE ENROLLED

QSD-002219

Page 107 of 218

|                      |                |                    |          |
|----------------------|----------------|--------------------|----------|
| <b>Product Code:</b> | HOE901/AVE0010 | <b>Study Code:</b> | EFC12405 |
|----------------------|----------------|--------------------|----------|

| Study Center No. | Investigator last name and first name* | Role in the Investigation        | Professional Degree(s) | Institutional Affiliation(s)                                                                                                    |
|------------------|----------------------------------------|----------------------------------|------------------------|---------------------------------------------------------------------------------------------------------------------------------|
| 840515           | Speece Jessica                         | Sub-Investigator/Co-Investigator | BS                     | PMG Research of Winston-Salem<br>1901 S Hawthorne Rd.<br>Suite 306<br>Winston-Salem<br>27103<br>North Carolina<br>UNITED STATES |
| 840515           | West Sandra                            | Sub-Investigator/Co-Investigator | CRC                    | PMG Research of Winston-Salem<br>1901 S Hawthorne Rd.<br>Suite 306<br>Winston-Salem<br>27103<br>North Carolina<br>UNITED STATES |
| 840515           | Wilson Jonathan                        | Principal Investigator           | DO                     | PMG Research of Winston-Salem<br>1901 S Hawthorne Rd.<br>Suite 306<br>Winston-Salem<br>27103<br>North Carolina<br>UNITED STATES |

\*CV provided as attachment to this appendix for all principal investigators

*Ensure that the printed copy of this document is the current version available on the Intranet.*

Property of the Sanofi Group - strictly confidential

Version Number: 4.0

28-JUL-2015

# SUPPLEMENTARY DATA

LIST OF PRINCIPAL INVESTIGATOR(S) AND SUB-INVESTIGATOR(S) PER STUDY SITE WHERE PATIENTS WERE ENROLLED

QSD-002219

Page 108 of 218

|                      |                |                    |          |
|----------------------|----------------|--------------------|----------|
| <b>Product Code:</b> | HOE901/AVE0010 | <b>Study Code:</b> | EFC12405 |
|----------------------|----------------|--------------------|----------|

| Study Center No. | Investigator last name and first name* | Role in the Investigation        | Professional Degree(s) | Institutional Affiliation(s)                                                                     |
|------------------|----------------------------------------|----------------------------------|------------------------|--------------------------------------------------------------------------------------------------|
| 840516           | Bays Harold                            | Principal Investigator           | MD                     | L-MARC Research Center<br>3288 Illinois Ave.<br>Louisville<br>40213<br>Kentucky<br>UNITED STATES |
| 840516           | Moore Melanie                          | Sub-Investigator/Co-Investigator | MSN                    | L-MARC Research Center<br>3288 Illinois Ave.<br>Louisville<br>40213<br>Kentucky<br>UNITED STATES |
| 840516           | Ritchey Barbara Michelle               | Sub-Investigator/Co-Investigator | MSN                    | L-MARC Research Center<br>3288 Illinois Ave.<br>Louisville<br>40213<br>Kentucky<br>UNITED STATES |
| 840516           | Smith Danielle                         | Sub-Investigator/Co-Investigator | APRN                   | L-MARC Research Center<br>3288 Illinois Ave.<br>Louisville<br>40213<br>Kentucky<br>UNITED STATES |

\*CV provided as attachment to this appendix for all principal investigators

*Ensure that the printed copy of this document is the current version available on the Intranet.*

Property of the Sanofi Group - strictly confidential

Version Number: 4.0

28-JUL-2015

# SUPPLEMENTARY DATA

LIST OF PRINCIPAL INVESTIGATOR(S) AND SUB-INVESTIGATOR(S) PER STUDY SITE WHERE PATIENTS WERE ENROLLED

QSD-002219

Page 109 of 218

|                      |                |                    |          |
|----------------------|----------------|--------------------|----------|
| <b>Product Code:</b> | HOE901/AVE0010 | <b>Study Code:</b> | EFC12405 |
|----------------------|----------------|--------------------|----------|

| Study Center No. | Investigator last name and first name* | Role in the Investigation        | Professional Degree(s) | Institutional Affiliation(s)                                                                           |
|------------------|----------------------------------------|----------------------------------|------------------------|--------------------------------------------------------------------------------------------------------|
| 840517           | Bao Shunzhong                          | Sub-Investigator/Co-Investigator | MD                     | Little Rock Diagnostic Clinic<br>10001 Lile Drive<br>Little Rock<br>72205<br>Arkansas<br>UNITED STATES |
| 840517           | Hamid Zulekha                          | Sub-Investigator/Co-Investigator | MD                     | Little Rock Diagnostic Clinic<br>10001 Lile Drive<br>Little Rock<br>72205<br>Arkansas<br>UNITED STATES |
| 840517           | Nair Ganesh                            | Principal Investigator           | MD                     | Little Rock Diagnostic Clinic<br>10001 Lile Drive<br>Little Rock<br>72205<br>Arkansas<br>UNITED STATES |
| 840517           | Randolph Carol June                    | Sub-Investigator/Co-Investigator | APN                    | Little Rock Diagnostic Clinic<br>10001 Lile Drive<br>Little Rock<br>72205<br>Arkansas<br>UNITED STATES |

\*CV provided as attachment to this appendix for all principal investigators

*Ensure that the printed copy of this document is the current version available on the Intranet.*

Property of the Sanofi Group - strictly confidential

Version Number: 4.0

28-JUL-2015



# SUPPLEMENTARY DATA

LIST OF PRINCIPAL INVESTIGATOR(S) AND SUB-INVESTIGATOR(S) PER STUDY SITE WHERE PATIENTS WERE ENROLLED

QSD-002219

Page 110 of 218

|                      |                |                    |          |
|----------------------|----------------|--------------------|----------|
| <b>Product Code:</b> | HOE901/AVE0010 | <b>Study Code:</b> | EFC12405 |
|----------------------|----------------|--------------------|----------|

| Study Center No. | Investigator last name and first name* | Role in the Investigation        | Professional Degree(s) | Institutional Affiliation(s)                                                                                              |
|------------------|----------------------------------------|----------------------------------|------------------------|---------------------------------------------------------------------------------------------------------------------------|
| 840517           | Rapp Richard Jay                       | Sub-Investigator/Co-Investigator | MD                     | Little Rock Diagnostic Clinic<br>10001 Lile Drive<br>Little Rock<br>72205<br>Arkansas<br>UNITED STATES                    |
| 840519           | Dugas Sr Jeffrey                       | Sub-Investigator/Co-Investigator | MD                     | Cedar Crosse Research Center<br>800 S Wells St Suite M15<br>Chicago<br>60607<br>Illinois<br>UNITED STATES                 |
| 840519           | <a href="#">Sugimoto Danny</a>         | Principal Investigator           | MD                     | Cedar Crosse Research Center<br>800 S Wells St Suite M15<br>Chicago<br>60607<br>Illinois<br>UNITED STATES                 |
| 840520           | <a href="#">Aroda Vanita</a>           | Principal Investigator           | MD                     | MedStar Health Research Institute<br>6525 Belcrest Road<br>Suite 700<br>Hyattsville<br>20782<br>Maryland<br>UNITED STATES |

\*CV provided as attachment to this appendix for all principal investigators

*Ensure that the printed copy of this document is the current version available on the Intranet.*

Property of the Sanofi Group - strictly confidential

Version Number: 4.0

28-JUL-2015

# SUPPLEMENTARY DATA

LIST OF PRINCIPAL INVESTIGATOR(S) AND SUB-INVESTIGATOR(S) PER STUDY SITE WHERE PATIENTS WERE ENROLLED

QSD-002219

Page 111 of 218

|                      |                |                    |          |
|----------------------|----------------|--------------------|----------|
| <b>Product Code:</b> | HOE901/AVE0010 | <b>Study Code:</b> | EFC12405 |
|----------------------|----------------|--------------------|----------|

| Study Center No. | Investigator last name and first name* | Role in the Investigation        | Professional Degree(s) | Institutional Affiliation(s)                                                                                              |
|------------------|----------------------------------------|----------------------------------|------------------------|---------------------------------------------------------------------------------------------------------------------------|
| 840520           | Crum Gray                              | Sub-Investigator/Co-Investigator | CCRC                   | MedStar Health Research Institute<br>6525 Belcrest Road<br>Suite 700<br>Hyattsville<br>20782<br>Maryland<br>UNITED STATES |
| 840520           | Getaneh Asqual                         | Sub-Investigator/Co-Investigator | MD                     | MedStar Health Research Institute<br>6525 Belcrest Road<br>Suite 700<br>Hyattsville<br>20782<br>Maryland<br>UNITED STATES |
| 840520           | Lindsay Milajurine                     | Sub-Investigator/Co-Investigator | MSc                    | MedStar Health Research Institute<br>6525 Belcrest Road<br>Suite 700<br>Hyattsville<br>20782<br>Maryland<br>UNITED STATES |

\*CV provided as attachment to this appendix for all principal investigators

*Ensure that the printed copy of this document is the current version available on the Intranet.*

Property of the Sanofi Group - strictly confidential

Version Number: 4.0

28-JUL-2015

# SUPPLEMENTARY DATA

LIST OF PRINCIPAL INVESTIGATOR(S) AND SUB-INVESTIGATOR(S) PER STUDY SITE WHERE PATIENTS WERE ENROLLED

QSD-002219

Page 112 of 218

|                      |                |                    |          |
|----------------------|----------------|--------------------|----------|
| <b>Product Code:</b> | HOE901/AVE0010 | <b>Study Code:</b> | EFC12405 |
|----------------------|----------------|--------------------|----------|

| Study Center No. | Investigator last name and first name* | Role in the Investigation        | Professional Degree(s) | Institutional Affiliation(s)                                                                          |
|------------------|----------------------------------------|----------------------------------|------------------------|-------------------------------------------------------------------------------------------------------|
| 840521           | Cohen Lisa                             | Principal Investigator           | D.O                    | Suncoast Clinical Research<br>5604 Gulf Drive<br>New Port Richey<br>34652<br>Florida<br>UNITED STATES |
| 840521           | Encarcion Frances                      | Sub-Investigator/Co-Investigator | CRC                    | Suncoast Clinical Research<br>5604 Gulf Drive<br>New Port Richey<br>34652<br>Florida<br>UNITED STATES |
| 840521           | Hasan Syed                             | Sub-Investigator/Co-Investigator | MD                     | Suncoast Clinical Research<br>5604 Gulf Drive<br>New Port Richey<br>34652<br>Florida<br>UNITED STATES |
| 840521           | Hicks Melissa                          | Sub-Investigator/Co-Investigator | CRC                    | Suncoast Clinical Research<br>5604 Gulf Drive<br>New Port Richey<br>34652<br>Florida<br>UNITED STATES |

\*CV provided as attachment to this appendix for all principal investigators

*Ensure that the printed copy of this document is the current version available on the Intranet.*

Property of the Sanofi Group - strictly confidential

Version Number: 4.0

28-JUL-2015

# SUPPLEMENTARY DATA

LIST OF PRINCIPAL INVESTIGATOR(S) AND SUB-INVESTIGATOR(S) PER STUDY SITE WHERE PATIENTS WERE ENROLLED

QSD-002219

Page 113 of 218

|                      |                |                    |          |
|----------------------|----------------|--------------------|----------|
| <b>Product Code:</b> | HOE901/AVE0010 | <b>Study Code:</b> | EFC12405 |
|----------------------|----------------|--------------------|----------|

| Study Center No. | Investigator last name and first name* | Role in the Investigation        | Professional Degree(s) | Institutional Affiliation(s)                                                                          |
|------------------|----------------------------------------|----------------------------------|------------------------|-------------------------------------------------------------------------------------------------------|
| 840521           | Janicka Ania                           | Sub-Investigator/Co-Investigator | DO                     | Suncoast Clinical Research<br>5604 Gulf Drive<br>New Port Richey<br>34652<br>Florida<br>UNITED STATES |
| 840521           | Kersey Angela                          | Sub-Investigator/Co-Investigator | CRC                    | Suncoast Clinical Research<br>5604 Gulf Drive<br>New Port Richey<br>34652<br>Florida<br>UNITED STATES |
| 840521           | Loman Lusiana                          | Sub-Investigator/Co-Investigator | MD                     | Suncoast Clinical Research<br>5604 Gulf Drive<br>New Port Richey<br>34652<br>Florida<br>UNITED STATES |
| 840521           | Penabad Jesus                          | Sub-Investigator/Co-Investigator | MD                     | Suncoast Clinical Research<br>5604 Gulf Drive<br>New Port Richey<br>34652<br>Florida<br>UNITED STATES |

\*CV provided as attachment to this appendix for all principal investigators

*Ensure that the printed copy of this document is the current version available on the Intranet.*

Property of the Sanofi Group - strictly confidential

Version Number: 4.0

28-JUL-2015

# SUPPLEMENTARY DATA

LIST OF PRINCIPAL INVESTIGATOR(S) AND SUB-INVESTIGATOR(S) PER STUDY SITE WHERE PATIENTS WERE ENROLLED

QSD-002219

Page 114 of 218

|                      |                |                    |          |
|----------------------|----------------|--------------------|----------|
| <b>Product Code:</b> | HOE901/AVE0010 | <b>Study Code:</b> | EFC12405 |
|----------------------|----------------|--------------------|----------|

| Study Center No. | Investigator last name and first name* | Role in the Investigation        | Professional Degree(s) | Institutional Affiliation(s)                                                                          |
|------------------|----------------------------------------|----------------------------------|------------------------|-------------------------------------------------------------------------------------------------------|
| 840521           | Pinero-Pilona Antonio                  | Sub-Investigator/Co-Investigator | MD                     | Suncoast Clinical Research<br>5604 Gulf Drive<br>New Port Richey<br>34652<br>Florida<br>UNITED STATES |
| 840521           | Puente Pierre Andres                   | Sub-Investigator/Co-Investigator | MD                     | Suncoast Clinical Research<br>5604 Gulf Drive<br>New Port Richey<br>34652<br>Florida<br>UNITED STATES |
| 840521           | Rosario Cristobal                      | Sub-Investigator/Co-Investigator | MD                     | Suncoast Clinical Research<br>5604 Gulf Drive<br>New Port Richey<br>34652<br>Florida<br>UNITED STATES |
| 840521           | Smith Krystal                          | Sub-Investigator/Co-Investigator | CCRC                   | Suncoast Clinical Research<br>5604 Gulf Drive<br>New Port Richey<br>34652<br>Florida<br>UNITED STATES |

\*CV provided as attachment to this appendix for all principal investigators

*Ensure that the printed copy of this document is the current version available on the Intranet.*

Property of the Sanofi Group - strictly confidential

Version Number: 4.0

28-JUL-2015

# SUPPLEMENTARY DATA

LIST OF PRINCIPAL INVESTIGATOR(S) AND SUB-INVESTIGATOR(S) PER STUDY SITE WHERE PATIENTS WERE ENROLLED

QSD-002219

Page 115 of 218

|               |                |             |          |
|---------------|----------------|-------------|----------|
| Product Code: | HOE901/AVE0010 | Study Code: | EFC12405 |
|---------------|----------------|-------------|----------|

| Study Center No. | Investigator last name and first name* | Role in the Investigation        | Professional Degree(s) | Institutional Affiliation(s)                                                                                                 |
|------------------|----------------------------------------|----------------------------------|------------------------|------------------------------------------------------------------------------------------------------------------------------|
| 840522           | Dempsey Michael                        | Principal Investigator           | MD                     | Endocrine and Metabolic Consultants<br>3200 Tower Oaks Blvd.<br>Suite 250<br>Rockville<br>20852<br>Maryland<br>UNITED STATES |
| 840522           | Lopez Meyling                          | Sub-Investigator/Co-Investigator | MA, SC                 | Endocrine and Metabolic Consultants<br>3200 Tower Oaks Blvd.<br>Suite 250<br>Rockville<br>20852<br>Maryland<br>UNITED STATES |
| 840522           | Rodbard Helena                         | Sub-Investigator/Co-Investigator | MD                     | Endocrine and Metabolic Consultants<br>3200 Tower Oaks Blvd.<br>Suite 250<br>Rockville<br>20852<br>Maryland<br>UNITED STATES |

\*CV provided as attachment to this appendix for all principal investigators

*Ensure that the printed copy of this document is the current version available on the Intranet.*

Property of the Sanofi Group - strictly confidential

Version Number: 4.0

28-JUL-2015

# SUPPLEMENTARY DATA

LIST OF PRINCIPAL INVESTIGATOR(S) AND SUB-INVESTIGATOR(S) PER STUDY SITE WHERE PATIENTS WERE ENROLLED

QSD-002219

Page 116 of 218

|                      |                |                    |          |
|----------------------|----------------|--------------------|----------|
| <b>Product Code:</b> | HOE901/AVE0010 | <b>Study Code:</b> | EFC12405 |
|----------------------|----------------|--------------------|----------|

| Study Center No. | Investigator last name and first name* | Role in the Investigation        | Professional Degree(s) | Institutional Affiliation(s)                                                                                                          |
|------------------|----------------------------------------|----------------------------------|------------------------|---------------------------------------------------------------------------------------------------------------------------------------|
| 840524           | Hubach Edward                          | Sub-Investigator/Co-Investigator | DO                     | Providence Health Partners-Center for Clinical Research<br>2912 Springboro W<br>Suite 200<br>Dayton<br>45439<br>Ohio<br>UNITED STATES |
| 840524           | Martin Paul                            | Principal Investigator           | DO                     | Providence Health Partners-Center for Clinical Research<br>2912 Springboro W<br>Suite 200<br>Dayton<br>45439<br>Ohio<br>UNITED STATES |
| 840525           | Brown Cynthia                          | Sub-Investigator/Co-Investigator | NP                     | Endocrine Research Solutions<br>1475 Holcomb Bridge Rd.<br>Suite 129<br>Roswell<br>30076<br>Georgia<br>UNITED STATES                  |

\*CV provided as attachment to this appendix for all principal investigators

*Ensure that the printed copy of this document is the current version available on the Intranet.*

Property of the Sanofi Group - strictly confidential

Version Number: 4.0

28-JUL-2015

# SUPPLEMENTARY DATA

LIST OF PRINCIPAL INVESTIGATOR(S) AND SUB-INVESTIGATOR(S) PER STUDY SITE WHERE PATIENTS WERE ENROLLED

QSD-002219

Page 117 of 218

|                      |                |                    |          |
|----------------------|----------------|--------------------|----------|
| <b>Product Code:</b> | HOE901/AVE0010 | <b>Study Code:</b> | EFC12405 |
|----------------------|----------------|--------------------|----------|

| Study Center No. | Investigator last name and first name* | Role in the Investigation        | Professional Degree(s) | Institutional Affiliation(s)                                                                                         |
|------------------|----------------------------------------|----------------------------------|------------------------|----------------------------------------------------------------------------------------------------------------------|
| 840525           | Estes Susie                            | Sub-Investigator/Co-Investigator | MD                     | Endocrine Research Solutions<br>1475 Holcomb Bridge Rd.<br>Suite 129<br>Roswell<br>30076<br>Georgia<br>UNITED STATES |
| 840525           | Jester Donni                           | Sub-Investigator/Co-Investigator | BS,MSN                 | Endocrine Research Solutions<br>1475 Holcomb Bridge Rd.<br>Suite 129<br>Roswell<br>30076<br>Georgia<br>UNITED STATES |
| 840525           | Munoz Miguel                           | Sub-Investigator/Co-Investigator | MD                     | Endocrine Research Solutions<br>1475 Holcomb Bridge Rd.<br>Suite 129<br>Roswell<br>30076<br>Georgia<br>UNITED STATES |

\*CV provided as attachment to this appendix for all principal investigators

*Ensure that the printed copy of this document is the current version available on the Intranet.*

Property of the Sanofi Group - strictly confidential

Version Number: 4.0

28-JUL-2015



# SUPPLEMENTARY DATA

LIST OF PRINCIPAL INVESTIGATOR(S) AND SUB-INVESTIGATOR(S) PER STUDY SITE WHERE PATIENTS WERE ENROLLED

QSD-002219

Page 118 of 218

|               |                |             |          |
|---------------|----------------|-------------|----------|
| Product Code: | HOE901/AVE0010 | Study Code: | EFC12405 |
|---------------|----------------|-------------|----------|

| Study Center No. | Investigator last name and first name* | Role in the Investigation        | Professional Degree(s) | Institutional Affiliation(s)                                                                                         |
|------------------|----------------------------------------|----------------------------------|------------------------|----------------------------------------------------------------------------------------------------------------------|
| 840525           | Reed John                              | Principal Investigator           | MD                     | Endocrine Research Solutions<br>1475 Holcomb Bridge Rd.<br>Suite 129<br>Roswell<br>30076<br>Georgia<br>UNITED STATES |
| 840526           | Hibbert Spencer                        | Sub-Investigator/Co-Investigator | PA-C                   | Advanced Research Institute<br>6028 South Ridgeline Drive<br>Suite 101<br>Ogden<br>84405<br>Utah<br>UNITED STATES    |
| 840526           | Wahlen Jack                            | Principal Investigator           | MD                     | Advanced Research Institute<br>6028 South Ridgeline Drive<br>Suite 101<br>Ogden<br>84405<br>Utah<br>UNITED STATES    |

\*CV provided as attachment to this appendix for all principal investigators

*Ensure that the printed copy of this document is the current version available on the Intranet.*

Property of the Sanofi Group - strictly confidential

Version Number: 4.0

28-JUL-2015

# SUPPLEMENTARY DATA

LIST OF PRINCIPAL INVESTIGATOR(S) AND SUB-INVESTIGATOR(S) PER STUDY SITE WHERE PATIENTS WERE ENROLLED

QSD-002219

Page 119 of 218

|                      |                |                    |          |
|----------------------|----------------|--------------------|----------|
| <b>Product Code:</b> | HOE901/AVE0010 | <b>Study Code:</b> | EFC12405 |
|----------------------|----------------|--------------------|----------|

| Study Center No. | Investigator last name and first name* | Role in the Investigation        | Professional Degree(s) | Institutional Affiliation(s)                                                                                               |
|------------------|----------------------------------------|----------------------------------|------------------------|----------------------------------------------------------------------------------------------------------------------------|
| 840526           | Winkfield Johnathan Nicolaas           | Sub-Investigator/Co-Investigator | PA-C                   | Advanced Research Institute<br>6028 South Ridgeline Drive<br>Suite 101<br>Ogden<br>84405<br>Utah<br>UNITED STATES          |
| 840529           | Argoud Georges                         | Principal Investigator           | MD                     | San Diego Coastal Endocrinology Group<br>340 Fourth Ave<br>Suite 7A<br>Chula Vista<br>91911<br>California<br>UNITED STATES |
| 840529           | Argoud Maria                           | Sub-Investigator/Co-Investigator | PA-C                   | San Diego Coastal Endocrinology Group<br>340 Fourth Ave<br>Suite 7A<br>Chula Vista<br>91911<br>California<br>UNITED STATES |

\*CV provided as attachment to this appendix for all principal investigators

*Ensure that the printed copy of this document is the current version available on the Intranet.*

Property of the Sanofi Group - strictly confidential

Version Number: 4.0

28-JUL-2015

# SUPPLEMENTARY DATA

LIST OF PRINCIPAL INVESTIGATOR(S) AND SUB-INVESTIGATOR(S) PER STUDY SITE WHERE PATIENTS WERE ENROLLED

QSD-002219

Page 120 of 218

|                      |                |                    |          |
|----------------------|----------------|--------------------|----------|
| <b>Product Code:</b> | HOE901/AVE0010 | <b>Study Code:</b> | EFC12405 |
|----------------------|----------------|--------------------|----------|

| Study Center No. | Investigator last name and first name* | Role in the Investigation        | Professional Degree(s) | Institutional Affiliation(s)                                                                                               |
|------------------|----------------------------------------|----------------------------------|------------------------|----------------------------------------------------------------------------------------------------------------------------|
| 840529           | Martin Brian                           | Sub-Investigator/Co-Investigator | PA-C                   | San Diego Coastal Endocrinology Group<br>340 Fourth Ave<br>Suite 7A<br>Chula Vista<br>91911<br>California<br>UNITED STATES |
| 840530           | Aronoff Stephen                        | Principal Investigator           | MD                     | Research Institute Of Dallas<br>10260 North Central Expressway<br>Suite 100n<br>Dallas<br>75231<br>Texas<br>UNITED STATES  |
| 840530           | Dorfman Steven                         | Sub-Investigator/Co-Investigator | MD                     | Research Institute Of Dallas<br>10260 North Central Expressway<br>Suite 100n<br>Dallas<br>75231<br>Texas<br>UNITED STATES  |

\*CV provided as attachment to this appendix for all principal investigators

*Ensure that the printed copy of this document is the current version available on the Intranet.*

Property of the Sanofi Group - strictly confidential

Version Number: 4.0

28-JUL-2015

# SUPPLEMENTARY DATA

LIST OF PRINCIPAL INVESTIGATOR(S) AND SUB-INVESTIGATOR(S) PER STUDY SITE WHERE PATIENTS WERE ENROLLED

QSD-002219

Page 121 of 218

|                      |                |                    |          |
|----------------------|----------------|--------------------|----------|
| <b>Product Code:</b> | HOE901/AVE0010 | <b>Study Code:</b> | EFC12405 |
|----------------------|----------------|--------------------|----------|

| Study Center No. | Investigator last name and first name* | Role in the Investigation        | Professional Degree(s) | Institutional Affiliation(s)                                                                                              |
|------------------|----------------------------------------|----------------------------------|------------------------|---------------------------------------------------------------------------------------------------------------------------|
| 840530           | Miklius Audrey                         | Sub-Investigator/Co-Investigator | MD                     | Research Institute Of Dallas<br>10260 North Central Expressway<br>Suite 100n<br>Dallas<br>75231<br>Texas<br>UNITED STATES |
| 840530           | Sachson Richard                        | Sub-Investigator/Co-Investigator | MD                     | Research Institute Of Dallas<br>10260 North Central Expressway<br>Suite 100n<br>Dallas<br>75231<br>Texas<br>UNITED STATES |
| 840530           | Schill Joseph                          | Sub-Investigator/Co-Investigator | ANP                    | Research Institute Of Dallas<br>10260 North Central Expressway<br>Suite 100n<br>Dallas<br>75231<br>Texas<br>UNITED STATES |

\*CV provided as attachment to this appendix for all principal investigators

*Ensure that the printed copy of this document is the current version available on the Intranet.*

Property of the Sanofi Group - strictly confidential

Version Number: 4.0

28-JUL-2015

# SUPPLEMENTARY DATA

LIST OF PRINCIPAL INVESTIGATOR(S) AND SUB-INVESTIGATOR(S) PER STUDY SITE WHERE PATIENTS WERE ENROLLED

QSD-002219

Page 122 of 218

|                      |                |                    |          |
|----------------------|----------------|--------------------|----------|
| <b>Product Code:</b> | HOE901/AVE0010 | <b>Study Code:</b> | EFC12405 |
|----------------------|----------------|--------------------|----------|

| Study Center No. | Investigator last name and first name* | Role in the Investigation        | Professional Degree(s) | Institutional Affiliation(s)                                                                                                |
|------------------|----------------------------------------|----------------------------------|------------------------|-----------------------------------------------------------------------------------------------------------------------------|
| 840531           | Baron Tatiana                          | Sub-Investigator/Co-Investigator | DO                     | North Shore Diabetes And Endoc<br>3003 New Hyde Park Road, Suite 201<br>New Hyde Park<br>11042<br>New York<br>UNITED STATES |
| 840531           | Bloom Ronda                            | Sub-Investigator/Co-Investigator | MD                     | North Shore Diabetes And Endoc<br>3003 New Hyde Park Road, Suite 201<br>New Hyde Park<br>11042<br>New York<br>UNITED STATES |
| 840531           | D'Ambra Russell                        | Sub-Investigator/Co-Investigator | MD                     | North Shore Diabetes And Endoc<br>3003 New Hyde Park Road, Suite 201<br>New Hyde Park<br>11042<br>New York<br>UNITED STATES |
| 840531           | <a href="#">Hershon Kenneth</a>        | Principal Investigator           | MD                     | North Shore Diabetes And Endoc<br>3003 New Hyde Park Road, Suite 201<br>New Hyde Park<br>11042<br>New York<br>UNITED STATES |

\*CV provided as attachment to this appendix for all principal investigators

*Ensure that the printed copy of this document is the current version available on the Intranet.*

Property of the Sanofi Group - strictly confidential

Version Number: 4.0

28-JUL-2015

# SUPPLEMENTARY DATA

LIST OF PRINCIPAL INVESTIGATOR(S) AND SUB-INVESTIGATOR(S) PER STUDY SITE WHERE PATIENTS WERE ENROLLED

QSD-002219

Page 123 of 218

|                      |                |                    |          |
|----------------------|----------------|--------------------|----------|
| <b>Product Code:</b> | HOE901/AVE0010 | <b>Study Code:</b> | EFC12405 |
|----------------------|----------------|--------------------|----------|

| Study Center No. | Investigator last name and first name* | Role in the Investigation        | Professional Degree(s) | Institutional Affiliation(s)                                                                                                |
|------------------|----------------------------------------|----------------------------------|------------------------|-----------------------------------------------------------------------------------------------------------------------------|
| 840531           | Hirsch Barbara                         | Sub-Investigator/Co-Investigator | MD                     | North Shore Diabetes And Endoc<br>3003 New Hyde Park Road, Suite 201<br>New Hyde Park<br>11042<br>New York<br>UNITED STATES |
| 840531           | Sachmechi Isaac                        | Sub-Investigator/Co-Investigator | MD                     | North Shore Diabetes And Endoc<br>3003 New Hyde Park Road, Suite 201<br>New Hyde Park<br>11042<br>New York<br>UNITED STATES |
| 840532           | Adams Atoya                            | Principal Investigator           | MD                     | AB Clinical Trials<br>2110 E. Flamingo Road<br>Suite 103<br>Las Vegas<br>89119<br>Nevada<br>UNITED STATES                   |
| 840532           | Emery Mindy                            | Sub-Investigator/Co-Investigator | CRC                    | AB Clinical Trials<br>2110 E. Flamingo Road<br>Suite 103<br>Las Vegas<br>89119<br>Nevada<br>UNITED STATES                   |

\*CV provided as attachment to this appendix for all principal investigators

*Ensure that the printed copy of this document is the current version available on the Intranet.*

Property of the Sanofi Group - strictly confidential

Version Number: 4.0

28-JUL-2015

# SUPPLEMENTARY DATA

LIST OF PRINCIPAL INVESTIGATOR(S) AND SUB-INVESTIGATOR(S) PER STUDY SITE WHERE PATIENTS WERE ENROLLED

QSD-002219

Page 124 of 218

|                      |                |                    |          |
|----------------------|----------------|--------------------|----------|
| <b>Product Code:</b> | HOE901/AVE0010 | <b>Study Code:</b> | EFC12405 |
|----------------------|----------------|--------------------|----------|

| Study Center No. | Investigator last name and first name* | Role in the Investigation        | Professional Degree(s) | Institutional Affiliation(s)                                                                               |
|------------------|----------------------------------------|----------------------------------|------------------------|------------------------------------------------------------------------------------------------------------|
| 840532           | Newsome Yvonne                         | Sub-Investigator/Co-Investigator | CRC                    | AB Clinical Trials<br>2110 E. Flamingo Road<br>Suite 103<br>Las Vegas<br>89119<br>Nevada<br>UNITED STATES  |
| 840534           | Bayne Deanna                           | Sub-Investigator/Co-Investigator | CCRP                   | Suncoast Clinical Research ,Inc<br>5604 Gulf Drive<br>New Port Richey<br>34652<br>Florida<br>UNITED STATES |
| 840534           | Cohen Lisa                             | Sub-Investigator/Co-Investigator | DO                     | Suncoast Clinical Research ,Inc<br>5604 Gulf Drive<br>New Port Richey<br>34652<br>Florida<br>UNITED STATES |
| 840534           | Condit Allison                         | Sub-Investigator/Co-Investigator | CCRP                   | Suncoast Clinical Research ,Inc<br>5604 Gulf Drive<br>New Port Richey<br>34652<br>Florida<br>UNITED STATES |

\*CV provided as attachment to this appendix for all principal investigators

*Ensure that the printed copy of this document is the current version available on the Intranet.*

Property of the Sanofi Group - strictly confidential

Version Number: 4.0

28-JUL-2015

# SUPPLEMENTARY DATA

LIST OF PRINCIPAL INVESTIGATOR(S) AND SUB-INVESTIGATOR(S) PER STUDY SITE WHERE PATIENTS WERE ENROLLED

QSD-002219

Page 125 of 218

|                      |                |                    |          |
|----------------------|----------------|--------------------|----------|
| <b>Product Code:</b> | HOE901/AVE0010 | <b>Study Code:</b> | EFC12405 |
|----------------------|----------------|--------------------|----------|

| Study Center No. | Investigator last name and first name* | Role in the Investigation        | Professional Degree(s) | Institutional Affiliation(s)                                                                               |
|------------------|----------------------------------------|----------------------------------|------------------------|------------------------------------------------------------------------------------------------------------|
| 840534           | Goldstein Gary                         | Sub-Investigator/Co-Investigator | MD                     | Suncoast Clinical Research ,Inc<br>5604 Gulf Drive<br>New Port Richey<br>34652<br>Florida<br>UNITED STATES |
| 840534           | Hester Bridget                         | Sub-Investigator/Co-Investigator | CRC                    | Suncoast Clinical Research ,Inc<br>5604 Gulf Drive<br>New Port Richey<br>34652<br>Florida<br>UNITED STATES |
| 840534           | Janicka Ania                           | Sub-Investigator/Co-Investigator | DO                     | Suncoast Clinical Research ,Inc<br>5604 Gulf Drive<br>New Port Richey<br>34652<br>Florida<br>UNITED STATES |
| 840534           | Lorello Michael                        | Sub-Investigator/Co-Investigator | MS,PA-C                | Suncoast Clinical Research ,Inc<br>5604 Gulf Drive<br>New Port Richey<br>34652<br>Florida<br>UNITED STATES |

\*CV provided as attachment to this appendix for all principal investigators

*Ensure that the printed copy of this document is the current version available on the Intranet.*

Property of the Sanofi Group - strictly confidential

Version Number: 4.0

28-JUL-2015



# SUPPLEMENTARY DATA

LIST OF PRINCIPAL INVESTIGATOR(S) AND SUB-INVESTIGATOR(S) PER STUDY SITE WHERE PATIENTS WERE ENROLLED

QSD-002219

Page 126 of 218

|                      |                |                    |          |
|----------------------|----------------|--------------------|----------|
| <b>Product Code:</b> | HOE901/AVE0010 | <b>Study Code:</b> | EFC12405 |
|----------------------|----------------|--------------------|----------|

| Study Center No. | Investigator last name and first name* | Role in the Investigation        | Professional Degree(s) | Institutional Affiliation(s)                                                                               |
|------------------|----------------------------------------|----------------------------------|------------------------|------------------------------------------------------------------------------------------------------------|
| 840534           | Neri Karena                            | Sub-Investigator/Co-Investigator | MD                     | Suncoast Clinical Research ,Inc<br>5604 Gulf Drive<br>New Port Richey<br>34652<br>Florida<br>UNITED STATES |
| 840534           | Penabad Jesus                          | Sub-Investigator/Co-Investigator | MD                     | Suncoast Clinical Research ,Inc<br>5604 Gulf Drive<br>New Port Richey<br>34652<br>Florida<br>UNITED STATES |
| 840534           | Plevin Sanford                         | Principal Investigator           | MD                     | Suncoast Clinical Research ,Inc<br>5604 Gulf Drive<br>New Port Richey<br>34652<br>Florida<br>UNITED STATES |
| 840534           | Puente Pierre Andres                   | Sub-Investigator/Co-Investigator | MD                     | Suncoast Clinical Research ,Inc<br>5604 Gulf Drive<br>New Port Richey<br>34652<br>Florida<br>UNITED STATES |

\*CV provided as attachment to this appendix for all principal investigators

*Ensure that the printed copy of this document is the current version available on the Intranet.*

Property of the Sanofi Group - strictly confidential

Version Number: 4.0

28-JUL-2015

# SUPPLEMENTARY DATA

LIST OF PRINCIPAL INVESTIGATOR(S) AND SUB-INVESTIGATOR(S) PER STUDY SITE WHERE PATIENTS WERE ENROLLED

QSD-002219

Page 127 of 218

|                      |                |                    |          |
|----------------------|----------------|--------------------|----------|
| <b>Product Code:</b> | HOE901/AVE0010 | <b>Study Code:</b> | EFC12405 |
|----------------------|----------------|--------------------|----------|

| Study Center No. | Investigator last name and first name* | Role in the Investigation        | Professional Degree(s) | Institutional Affiliation(s)                                                                               |
|------------------|----------------------------------------|----------------------------------|------------------------|------------------------------------------------------------------------------------------------------------|
| 840534           | Rosario Cristobal                      | Sub-Investigator/Co-Investigator | MD                     | Suncoast Clinical Research ,Inc<br>5604 Gulf Drive<br>New Port Richey<br>34652<br>Florida<br>UNITED STATES |
| 840534           | Rutledge Hugh                          | Sub-Investigator/Co-Investigator | MD                     | Suncoast Clinical Research ,Inc<br>5604 Gulf Drive<br>New Port Richey<br>34652<br>Florida<br>UNITED STATES |
| 840534           | Polin Arthur                           | Sub-Investigator/Co-Investigator | MD                     | Suncoast Clinical Research ,Inc<br>5604 Gulf Drive<br>New Port Richey<br>34652<br>Florida<br>UNITED STATES |

\*CV provided as attachment to this appendix for all principal investigators

*Ensure that the printed copy of this document is the current version available on the Intranet.*

Property of the Sanofi Group - strictly confidential

Version Number: 4.0

28-JUL-2015

# SUPPLEMENTARY DATA

LIST OF PRINCIPAL INVESTIGATOR(S) AND SUB-INVESTIGATOR(S) PER STUDY SITE WHERE PATIENTS WERE ENROLLED

QSD-002219

Page 128 of 218

|                      |                |                    |          |
|----------------------|----------------|--------------------|----------|
| <b>Product Code:</b> | HOE901/AVE0010 | <b>Study Code:</b> | EFC12405 |
|----------------------|----------------|--------------------|----------|

| Study Center No. | Investigator last name and first name* | Role in the Investigation        | Professional Degree(s) | Institutional Affiliation(s)                                                                                     |
|------------------|----------------------------------------|----------------------------------|------------------------|------------------------------------------------------------------------------------------------------------------|
| 840535           | Avots Erik                             | Sub-Investigator/Co-Investigator | CRC                    | Wilmington Medical Research<br>1202 Medical Center Dr.<br>Wilmington<br>28401<br>North Carolina<br>UNITED STATES |
| 840535           | Cannon Kevin Dougherty                 | Sub-Investigator/Co-Investigator | MD                     | Wilmington Medical Research<br>1202 Medical Center Dr.<br>Wilmington<br>28401<br>North Carolina<br>UNITED STATES |
| 840535           | Daum Catherine Anne                    | Sub-Investigator/Co-Investigator | MD                     | Wilmington Medical Research<br>1202 Medical Center Dr.<br>Wilmington<br>28401<br>North Carolina<br>UNITED STATES |
| 840535           | Staub Jonathan Simon                   | Sub-Investigator/Co-Investigator | MD                     | Wilmington Medical Research<br>1202 Medical Center Dr.<br>Wilmington<br>28401<br>North Carolina<br>UNITED STATES |

\*CV provided as attachment to this appendix for all principal investigators

*Ensure that the printed copy of this document is the current version available on the Intranet.*

Property of the Sanofi Group - strictly confidential

Version Number: 4.0

28-JUL-2015

# SUPPLEMENTARY DATA

LIST OF PRINCIPAL INVESTIGATOR(S) AND SUB-INVESTIGATOR(S) PER STUDY SITE WHERE PATIENTS WERE ENROLLED

QSD-002219

Page 129 of 218

|                      |                |                    |          |
|----------------------|----------------|--------------------|----------|
| <b>Product Code:</b> | HOE901/AVE0010 | <b>Study Code:</b> | EFC12405 |
|----------------------|----------------|--------------------|----------|

| Study Center No. | Investigator last name and first name* | Role in the Investigation        | Professional Degree(s) | Institutional Affiliation(s)                                                                                            |
|------------------|----------------------------------------|----------------------------------|------------------------|-------------------------------------------------------------------------------------------------------------------------|
| 840535           | Webster Brian                          | Principal Investigator           | MD                     | Wilmington Medical Research<br>1202 Medical Center Dr.<br>Wilmington<br>28401<br>North Carolina<br>UNITED STATES        |
| 840536           | Lisovskiy Svetlana                     | Sub-Investigator/Co-Investigator | PA-C                   | NorCal Endocrinology<br>111 Deerwood road suite 180<br>San Ramon<br>94583<br>California<br>UNITED STATES                |
| 840536           | Shlesinger Yshay                       | Principal Investigator           | MD                     | NorCal Endocrinology<br>111 Deerwood road suite 180<br>San Ramon<br>94583<br>California<br>UNITED STATES                |
| 840537           | Nimmo Teresa                           | Sub-Investigator/Co-Investigator | MD                     | Medical Investigations, Inc.<br>500 S University Ave.<br>Suite 615<br>Little Rock<br>72205<br>Arkansas<br>UNITED STATES |

\*CV provided as attachment to this appendix for all principal investigators

*Ensure that the printed copy of this document is the current version available on the Intranet.*

Property of the Sanofi Group - strictly confidential

Version Number: 4.0

28-JUL-2015

# SUPPLEMENTARY DATA

LIST OF PRINCIPAL INVESTIGATOR(S) AND SUB-INVESTIGATOR(S) PER STUDY SITE WHERE PATIENTS WERE ENROLLED

QSD-002219

Page 130 of 218

|               |                |             |          |
|---------------|----------------|-------------|----------|
| Product Code: | HOE901/AVE0010 | Study Code: | EFC12405 |
|---------------|----------------|-------------|----------|

| Study Center No. | Investigator last name and first name* | Role in the Investigation        | Professional Degree(s) | Institutional Affiliation(s)                                                                                            |
|------------------|----------------------------------------|----------------------------------|------------------------|-------------------------------------------------------------------------------------------------------------------------|
| 840537           | Thrasher James                         | Principal Investigator           | MD                     | Medical Investigations, Inc.<br>500 S University Ave.<br>Suite 615<br>Little Rock<br>72205<br>Arkansas<br>UNITED STATES |
| 840538           | Curtis Craig                           | Sub-Investigator/Co-Investigator | MD                     | Endocrine Associates of Florida<br>1530 Citrus Medical Ct.<br>Suite 103<br>Ocoee<br>34761<br>Florida<br>UNITED STATES   |
| 840538           | Mandry Jose                            | Principal Investigator           | MD                     | Endocrine Associates of Florida<br>1530 Citrus Medical Ct.<br>Suite 103<br>Ocoee<br>34761<br>Florida<br>UNITED STATES   |

\*CV provided as attachment to this appendix for all principal investigators

*Ensure that the printed copy of this document is the current version available on the Intranet.*

Property of the Sanofi Group - strictly confidential

Version Number: 4.0

28-JUL-2015

# SUPPLEMENTARY DATA

LIST OF PRINCIPAL INVESTIGATOR(S) AND SUB-INVESTIGATOR(S) PER STUDY SITE WHERE PATIENTS WERE ENROLLED

QSD-002219

Page 131 of 218

|                      |                |                    |          |
|----------------------|----------------|--------------------|----------|
| <b>Product Code:</b> | HOE901/AVE0010 | <b>Study Code:</b> | EFC12405 |
|----------------------|----------------|--------------------|----------|

| Study Center No. | Investigator last name and first name* | Role in the Investigation        | Professional Degree(s) | Institutional Affiliation(s)                                                                                                      |
|------------------|----------------------------------------|----------------------------------|------------------------|-----------------------------------------------------------------------------------------------------------------------------------|
| 840539           | Chuang Ellie                           | Sub-Investigator/Co-Investigator | MD                     | Southern New Hampshire Diabetes & Endocrinology Center<br>29 Northwest Blvd.<br>Nashua<br>03063<br>New Hampshire<br>UNITED STATES |
| 840539           | Silver Robert                          | Principal Investigator           | MD                     | Southern New Hampshire Diabetes & Endocrinology Center<br>29 Northwest Blvd.<br>Nashua<br>03063<br>New Hampshire<br>UNITED STATES |
| 840540           | Barber Anthony Rodman                  | Sub-Investigator/Co-Investigator | MD                     | PMG Research of Hickory<br>1036 Second St. NE<br>Hickory<br>28601<br>North Carolina<br>UNITED STATES                              |
| 840540           | Childres Christopher                   | Sub-Investigator/Co-Investigator | CRC                    | PMG Research of Hickory<br>1036 Second St. NE<br>Hickory<br>28601<br>North Carolina<br>UNITED STATES                              |

\*CV provided as attachment to this appendix for all principal investigators

*Ensure that the printed copy of this document is the current version available on the Intranet.*

Property of the Sanofi Group - strictly confidential

Version Number: 4.0

28-JUL-2015

# SUPPLEMENTARY DATA

LIST OF PRINCIPAL INVESTIGATOR(S) AND SUB-INVESTIGATOR(S) PER STUDY SITE WHERE PATIENTS WERE ENROLLED

QSD-002219

Page 132 of 218

|                      |                |                    |          |
|----------------------|----------------|--------------------|----------|
| <b>Product Code:</b> | HOE901/AVE0010 | <b>Study Code:</b> | EFC12405 |
|----------------------|----------------|--------------------|----------|

| Study Center No. | Investigator last name and first name* | Role in the Investigation        | Professional Degree(s) | Institutional Affiliation(s)                                                                         |
|------------------|----------------------------------------|----------------------------------|------------------------|------------------------------------------------------------------------------------------------------|
| 840540           | Cullars Stephanie                      | Sub-Investigator/Co-Investigator | CRC                    | PMG Research of Hickory<br>1036 Second St. NE<br>Hickory<br>28601<br>North Carolina<br>UNITED STATES |
| 840540           | Donepudi Venkatarama Sekher            | Sub-Investigator/Co-Investigator | MD                     | PMG Research of Hickory<br>1036 Second St. NE<br>Hickory<br>28601<br>North Carolina<br>UNITED STATES |
| 840540           | Earl John                              | Principal Investigator           | MD                     | PMG Research of Hickory<br>1036 Second St. NE<br>Hickory<br>28601<br>North Carolina<br>UNITED STATES |
| 840540           | Hemby Katherine Anne                   | Sub-Investigator/Co-Investigator | MD                     | PMG Research of Hickory<br>1036 Second St. NE<br>Hickory<br>28601<br>North Carolina<br>UNITED STATES |

\*CV provided as attachment to this appendix for all principal investigators

*Ensure that the printed copy of this document is the current version available on the Intranet.*

Property of the Sanofi Group - strictly confidential

Version Number: 4.0

28-JUL-2015

# SUPPLEMENTARY DATA

LIST OF PRINCIPAL INVESTIGATOR(S) AND SUB-INVESTIGATOR(S) PER STUDY SITE WHERE PATIENTS WERE ENROLLED

QSD-002219

Page 133 of 218

|                      |                |                    |          |
|----------------------|----------------|--------------------|----------|
| <b>Product Code:</b> | HOE901/AVE0010 | <b>Study Code:</b> | EFC12405 |
|----------------------|----------------|--------------------|----------|

| Study Center No. | Investigator last name and first name* | Role in the Investigation        | Professional Degree(s) | Institutional Affiliation(s)                                                                         |
|------------------|----------------------------------------|----------------------------------|------------------------|------------------------------------------------------------------------------------------------------|
| 840540           | Hodges James Robinson                  | Sub-Investigator/Co-Investigator | MD                     | PMG Research of Hickory<br>1036 Second St. NE<br>Hickory<br>28601<br>North Carolina<br>UNITED STATES |
| 840540           | Jones Ann                              | Sub-Investigator/Co-Investigator | CRC                    | PMG Research of Hickory<br>1036 Second St. NE<br>Hickory<br>28601<br>North Carolina<br>UNITED STATES |
| 840540           | Morgante Patrick John                  | Sub-Investigator/Co-Investigator | DO                     | PMG Research of Hickory<br>1036 Second St. NE<br>Hickory<br>28601<br>North Carolina<br>UNITED STATES |
| 840540           | Orozco Ian James                       | Sub-Investigator/Co-Investigator | MD                     | PMG Research of Hickory<br>1036 Second St. NE<br>Hickory<br>28601<br>North Carolina<br>UNITED STATES |

\*CV provided as attachment to this appendix for all principal investigators

*Ensure that the printed copy of this document is the current version available on the Intranet.*

Property of the Sanofi Group - strictly confidential

Version Number: 4.0

28-JUL-2015



# SUPPLEMENTARY DATA

LIST OF PRINCIPAL INVESTIGATOR(S) AND SUB-INVESTIGATOR(S) PER STUDY SITE WHERE PATIENTS WERE ENROLLED

QSD-002219

Page 134 of 218

|                      |                |                    |          |
|----------------------|----------------|--------------------|----------|
| <b>Product Code:</b> | HOE901/AVE0010 | <b>Study Code:</b> | EFC12405 |
|----------------------|----------------|--------------------|----------|

| Study Center No. | Investigator last name and first name* | Role in the Investigation        | Professional Degree(s) | Institutional Affiliation(s)                                                                         |
|------------------|----------------------------------------|----------------------------------|------------------------|------------------------------------------------------------------------------------------------------|
| 840540           | Polster Scott David                    | Sub-Investigator/Co-Investigator | MD                     | PMG Research of Hickory<br>1036 Second St. NE<br>Hickory<br>28601<br>North Carolina<br>UNITED STATES |
| 840540           | Rector Alicia Ferrell                  | Sub-Investigator/Co-Investigator | NP                     | PMG Research of Hickory<br>1036 Second St. NE<br>Hickory<br>28601<br>North Carolina<br>UNITED STATES |
| 840540           | Taylor Stephane                        | Sub-Investigator/Co-Investigator | CRC                    | PMG Research of Hickory<br>1036 Second St. NE<br>Hickory<br>28601<br>North Carolina<br>UNITED STATES |
| 840540           | Woods Michelle Hansen                  | Sub-Investigator/Co-Investigator | PA-C                   | PMG Research of Hickory<br>1036 Second St. NE<br>Hickory<br>28601<br>North Carolina<br>UNITED STATES |

\*CV provided as attachment to this appendix for all principal investigators

*Ensure that the printed copy of this document is the current version available on the Intranet.*

Property of the Sanofi Group - strictly confidential

Version Number: 4.0

28-JUL-2015

# SUPPLEMENTARY DATA

LIST OF PRINCIPAL INVESTIGATOR(S) AND SUB-INVESTIGATOR(S) PER STUDY SITE WHERE PATIENTS WERE ENROLLED

QSD-002219

Page 135 of 218

|                      |                |                    |          |
|----------------------|----------------|--------------------|----------|
| <b>Product Code:</b> | HOE901/AVE0010 | <b>Study Code:</b> | EFC12405 |
|----------------------|----------------|--------------------|----------|

| Study Center No. | Investigator last name and first name* | Role in the Investigation        | Professional Degree(s) | Institutional Affiliation(s)                                                                                       |
|------------------|----------------------------------------|----------------------------------|------------------------|--------------------------------------------------------------------------------------------------------------------|
| 840541           | Evans Kathryn                          | Sub-Investigator/Co-Investigator | DNP,MS,RN              | Duke University Medical Center<br>2301 Erwin Rd.<br>Rm. 7607<br>Durham<br>27710<br>North Carolina<br>UNITED STATES |
| 840541           | Feinglos Mark                          | Principal Investigator           | MD                     | Duke University Medical Center<br>2301 Erwin Rd.<br>Rm. 7607<br>Durham<br>27710<br>North Carolina<br>UNITED STATES |
| 840543           | Benson Mark                            | Sub-Investigator/Co-Investigator | DO                     | American Health Network of Indiana, LLC<br>5250 E US 36<br>Suite 610<br>Avon<br>46123<br>Indiana<br>UNITED STATES  |

\*CV provided as attachment to this appendix for all principal investigators

*Ensure that the printed copy of this document is the current version available on the Intranet.*

Property of the Sanofi Group - strictly confidential

Version Number: 4.0

28-JUL-2015

# SUPPLEMENTARY DATA

LIST OF PRINCIPAL INVESTIGATOR(S) AND SUB-INVESTIGATOR(S) PER STUDY SITE WHERE PATIENTS WERE ENROLLED

QSD-002219

Page 136 of 218

|                      |                |                    |          |
|----------------------|----------------|--------------------|----------|
| <b>Product Code:</b> | HOE901/AVE0010 | <b>Study Code:</b> | EFC12405 |
|----------------------|----------------|--------------------|----------|

| Study Center No. | Investigator last name and first name* | Role in the Investigation        | Professional Degree(s) | Institutional Affiliation(s)                                                                                      |
|------------------|----------------------------------------|----------------------------------|------------------------|-------------------------------------------------------------------------------------------------------------------|
| 840543           | Cravens Carla                          | Sub-Investigator/Co-Investigator | CMA                    | American Health Network of Indiana, LLC<br>5250 E US 36<br>Suite 610<br>Avon<br>46123<br>Indiana<br>UNITED STATES |
| 840543           | Schmoll Mary                           | Sub-Investigator/Co-Investigator | NP                     | American Health Network of Indiana, LLC<br>5250 E US 36<br>Suite 610<br>Avon<br>46123<br>Indiana<br>UNITED STATES |
| 840543           | Smith Judy                             | Sub-Investigator/Co-Investigator | RN                     | American Health Network of Indiana, LLC<br>5250 E US 36<br>Suite 610<br>Avon<br>46123<br>Indiana<br>UNITED STATES |

\*CV provided as attachment to this appendix for all principal investigators

*Ensure that the printed copy of this document is the current version available on the Intranet.*

Property of the Sanofi Group - strictly confidential

Version Number: 4.0

28-JUL-2015

# SUPPLEMENTARY DATA

LIST OF PRINCIPAL INVESTIGATOR(S) AND SUB-INVESTIGATOR(S) PER STUDY SITE WHERE PATIENTS WERE ENROLLED

QSD-002219

Page 137 of 218

|                      |                |                    |          |
|----------------------|----------------|--------------------|----------|
| <b>Product Code:</b> | HOE901/AVE0010 | <b>Study Code:</b> | EFC12405 |
|----------------------|----------------|--------------------|----------|

| Study Center No. | Investigator last name and first name* | Role in the Investigation        | Professional Degree(s) | Institutional Affiliation(s)                                                                                                                                                               |
|------------------|----------------------------------------|----------------------------------|------------------------|--------------------------------------------------------------------------------------------------------------------------------------------------------------------------------------------|
| 840543           | Stegemoller Ronald                     | Principal Investigator           | MD                     | American Health Network of Indiana, LLC<br>5250 E US 36<br>Suite 610<br>Avon<br>46123<br>Indiana<br>UNITED STATES                                                                          |
| 840544           | Koops Maureen                          | Sub-Investigator/Co-Investigator | MD                     | South Texas Veterans Health Care System,<br>Audie L. Murphy, Biomedical Research<br>Foundation of South Texas,<br>7400 Merton Minton Blvd,<br>San Antonio,<br>78229<br>TX<br>UNITED STATES |
| 840544           | Pinkson Sheila                         | Sub-Investigator/Co-Investigator | MS,PA-C                | South Texas Veterans Health Care System,<br>Audie L. Murphy, Biomedical Research<br>Foundation of South Texas,<br>7400 Merton Minton Blvd,<br>San Antonio,<br>78229<br>TX<br>UNITED STATES |

\*CV provided as attachment to this appendix for all principal investigators

*Ensure that the printed copy of this document is the current version available on the Intranet.*

Property of the Sanofi Group - strictly confidential

Version Number: 4.0

28-JUL-2015

# SUPPLEMENTARY DATA

LIST OF PRINCIPAL INVESTIGATOR(S) AND SUB-INVESTIGATOR(S) PER STUDY SITE WHERE PATIENTS WERE ENROLLED

QSD-002219

Page 138 of 218

|                      |                |                    |          |
|----------------------|----------------|--------------------|----------|
| <b>Product Code:</b> | HOE901/AVE0010 | <b>Study Code:</b> | EFC12405 |
|----------------------|----------------|--------------------|----------|

| Study Center No. | Investigator last name and first name* | Role in the Investigation        | Professional Degree(s) | Institutional Affiliation(s)                                                                                                                                                               |
|------------------|----------------------------------------|----------------------------------|------------------------|--------------------------------------------------------------------------------------------------------------------------------------------------------------------------------------------|
| 840544           | Tripathy Devjit                        | Principal Investigator           | MD,PhD                 | South Texas Veterans Health Care System,<br>Audie L. Murphy, Biomedical Research<br>Foundation of South Texas,<br>7400 Merton Minton Blvd,<br>San Antonio,<br>78229<br>TX<br>UNITED STATES |
| 840545           | Chionh Kristen                         | Sub-Investigator/Co-Investigator | MS                     | Baylor University<br>3600 Gaston Ave.<br>Suite 656<br>Dallas<br>75246<br>Texas<br>UNITED STATES                                                                                            |
| 840545           | Hollander Priscilla                    | Principal Investigator           | MD                     | Baylor University<br>3600 Gaston Ave.<br>Suite 656<br>Dallas<br>75246<br>Texas<br>UNITED STATES                                                                                            |

\*CV provided as attachment to this appendix for all principal investigators

*Ensure that the printed copy of this document is the current version available on the Intranet.*

Property of the Sanofi Group - strictly confidential

Version Number: 4.0

28-JUL-2015

# SUPPLEMENTARY DATA

LIST OF PRINCIPAL INVESTIGATOR(S) AND SUB-INVESTIGATOR(S) PER STUDY SITE WHERE PATIENTS WERE ENROLLED

QSD-002219

Page 139 of 218

|                      |                |                    |          |
|----------------------|----------------|--------------------|----------|
| <b>Product Code:</b> | HOE901/AVE0010 | <b>Study Code:</b> | EFC12405 |
|----------------------|----------------|--------------------|----------|

| Study Center No. | Investigator last name and first name* | Role in the Investigation        | Professional Degree(s) | Institutional Affiliation(s)                                                                    |
|------------------|----------------------------------------|----------------------------------|------------------------|-------------------------------------------------------------------------------------------------|
| 840545           | Manley Meghan                          | Sub-Investigator/Co-Investigator | CRC                    | Baylor University<br>3600 Gaston Ave.<br>Suite 656<br>Dallas<br>75246<br>Texas<br>UNITED STATES |
| 840545           | Pelletier Susan                        | Sub-Investigator/Co-Investigator | CCRC                   | Baylor University<br>3600 Gaston Ave.<br>Suite 656<br>Dallas<br>75246<br>Texas<br>UNITED STATES |
| 840545           | Roe Erin                               | Sub-Investigator/Co-Investigator | MD                     | Baylor University<br>3600 Gaston Ave.<br>Suite 656<br>Dallas<br>75246<br>Texas<br>UNITED STATES |

\*CV provided as attachment to this appendix for all principal investigators

*Ensure that the printed copy of this document is the current version available on the Intranet.*

Property of the Sanofi Group - strictly confidential

Version Number: 4.0

28-JUL-2015

# SUPPLEMENTARY DATA

LIST OF PRINCIPAL INVESTIGATOR(S) AND SUB-INVESTIGATOR(S) PER STUDY SITE WHERE PATIENTS WERE ENROLLED

QSD-002219

Page 140 of 218

|                      |                |                    |          |
|----------------------|----------------|--------------------|----------|
| <b>Product Code:</b> | HOE901/AVE0010 | <b>Study Code:</b> | EFC12405 |
|----------------------|----------------|--------------------|----------|

| Study Center No. | Investigator last name and first name* | Role in the Investigation        | Professional Degree(s) | Institutional Affiliation(s)                                                                                        |
|------------------|----------------------------------------|----------------------------------|------------------------|---------------------------------------------------------------------------------------------------------------------|
| 840545           | Schuh Kristy                           | Sub-Investigator/Co-Investigator | FNP-C                  | Baylor University<br>3600 Gaston Ave.<br>Suite 656<br>Dallas<br>75246<br>Texas<br>UNITED STATES                     |
| 840546           | Jain Rajeev                            | Principal Investigator           | MD                     | Aurora Advanced Healthcare SC<br>3003 W. Good Hope Road<br>Milwaukee<br>53209-0996<br>Wisconsin<br>UNITED STATES    |
| 840546           | Lim Arnold                             | Sub-Investigator/Co-Investigator | MD                     | Aurora Advanced Healthcare SC<br>3003 W. Good Hope Road<br>Milwaukee<br>53209-0996<br>Wisconsin<br>UNITED STATES    |
| 840547           | Banarer Salomon                        | Sub-Investigator/Co-Investigator | MD                     | Dallas Diabetes and Endocrine Center<br>7777 Forest Ln.<br>Suite C-685<br>Dallas<br>75230<br>Texas<br>UNITED STATES |

\*CV provided as attachment to this appendix for all principal investigators

*Ensure that the printed copy of this document is the current version available on the Intranet.*

Property of the Sanofi Group - strictly confidential

Version Number: 4.0

28-JUL-2015

# SUPPLEMENTARY DATA

LIST OF PRINCIPAL INVESTIGATOR(S) AND SUB-INVESTIGATOR(S) PER STUDY SITE WHERE PATIENTS WERE ENROLLED

QSD-002219

Page 141 of 218

|                      |                |                    |          |
|----------------------|----------------|--------------------|----------|
| <b>Product Code:</b> | HOE901/AVE0010 | <b>Study Code:</b> | EFC12405 |
|----------------------|----------------|--------------------|----------|

| Study Center No. | Investigator last name and first name* | Role in the Investigation        | Professional Degree(s) | Institutional Affiliation(s)                                                                                        |
|------------------|----------------------------------------|----------------------------------|------------------------|---------------------------------------------------------------------------------------------------------------------|
| 840547           | Kniffen Wendy                          | Sub-Investigator/Co-Investigator | PA-C                   | Dallas Diabetes and Endocrine Center<br>7777 Forest Ln.<br>Suite C-685<br>Dallas<br>75230<br>Texas<br>UNITED STATES |
| 840547           | Rooker Morris Leslie Anne              | Sub-Investigator/Co-Investigator | PA-C                   | Dallas Diabetes and Endocrine Center<br>7777 Forest Ln.<br>Suite C-685<br>Dallas<br>75230<br>Texas<br>UNITED STATES |
| 840547           | <a href="#">Rosenstock Julio</a>       | Principal Investigator           | MD                     | Dallas Diabetes and Endocrine Center<br>7777 Forest Ln.<br>Suite C-685<br>Dallas<br>75230<br>Texas<br>UNITED STATES |

\*CV provided as attachment to this appendix for all principal investigators

*Ensure that the printed copy of this document is the current version available on the Intranet.*

Property of the Sanofi Group - strictly confidential

Version Number: 4.0

28-JUL-2015



# SUPPLEMENTARY DATA

LIST OF PRINCIPAL INVESTIGATOR(S) AND SUB-INVESTIGATOR(S) PER STUDY SITE WHERE PATIENTS WERE ENROLLED

QSD-002219

Page 142 of 218

|                      |                |                    |          |
|----------------------|----------------|--------------------|----------|
| <b>Product Code:</b> | HOE901/AVE0010 | <b>Study Code:</b> | EFC12405 |
|----------------------|----------------|--------------------|----------|

| Study Center No. | Investigator last name and first name* | Role in the Investigation        | Professional Degree(s) | Institutional Affiliation(s)                                                                                                      |
|------------------|----------------------------------------|----------------------------------|------------------------|-----------------------------------------------------------------------------------------------------------------------------------|
| 840549           | Lenhard James                          | Principal Investigator           | MD                     | Christiana Care Health Services, Inc.<br>4735 Ogletown-Stanton Road,<br>Suite 3203, Newark,<br>19713<br>Delaware<br>UNITED STATES |
| 840549           | Seshadri Prakash                       | Sub-Investigator/Co-Investigator | MD                     | Christiana Care Health Services, Inc.<br>4735 Ogletown-Stanton Road,<br>Suite 3203, Newark,<br>19713<br>Delaware<br>UNITED STATES |
| 840549           | Wachter Amy                            | Sub-Investigator/Co-Investigator | MD                     | Christiana Care Health Services, Inc.<br>4735 Ogletown-Stanton Road,<br>Suite 3203, Newark,<br>19713<br>Delaware<br>UNITED STATES |
| 840550           | Barnett Omar                           | Sub-Investigator/Co-Investigator | BS, CRC                | Catalina Research Institute LLC<br>14726 Ramona Ave<br>Suite 110<br>Chino<br>91710<br>California<br>UNITED STATES                 |

\*CV provided as attachment to this appendix for all principal investigators

*Ensure that the printed copy of this document is the current version available on the Intranet.*

Property of the Sanofi Group - strictly confidential

Version Number: 4.0

28-JUL-2015

# SUPPLEMENTARY DATA

LIST OF PRINCIPAL INVESTIGATOR(S) AND SUB-INVESTIGATOR(S) PER STUDY SITE WHERE PATIENTS WERE ENROLLED

QSD-002219

Page 143 of 218

|                      |                |                    |          |
|----------------------|----------------|--------------------|----------|
| <b>Product Code:</b> | HOE901/AVE0010 | <b>Study Code:</b> | EFC12405 |
|----------------------|----------------|--------------------|----------|

| Study Center No. | Investigator last name and first name* | Role in the Investigation        | Professional Degree(s) | Institutional Affiliation(s)                                                                                      |
|------------------|----------------------------------------|----------------------------------|------------------------|-------------------------------------------------------------------------------------------------------------------|
| 840550           | Martinez Gilbert                       | Sub-Investigator/Co-Investigator | MD                     | Catalina Research Institute LLC<br>14726 Ramona Ave<br>Suite 110<br>Chino<br>91710<br>California<br>UNITED STATES |
| 840550           | Martinez-Miss Salomon                  | Sub-Investigator/Co-Investigator | CRC                    | Catalina Research Institute LLC<br>14726 Ramona Ave<br>Suite 110<br>Chino<br>91710<br>California<br>UNITED STATES |
| 840550           | Moon Mia                               | Sub-Investigator/Co-Investigator | MD                     | Catalina Research Institute LLC<br>14726 Ramona Ave<br>Suite 110<br>Chino<br>91710<br>California<br>UNITED STATES |

\*CV provided as attachment to this appendix for all principal investigators

*Ensure that the printed copy of this document is the current version available on the Intranet.*

Property of the Sanofi Group - strictly confidential

Version Number: 4.0

28-JUL-2015

# SUPPLEMENTARY DATA

LIST OF PRINCIPAL INVESTIGATOR(S) AND SUB-INVESTIGATOR(S) PER STUDY SITE WHERE PATIENTS WERE ENROLLED

QSD-002219

Page 144 of 218

|                      |                |                    |          |
|----------------------|----------------|--------------------|----------|
| <b>Product Code:</b> | HOE901/AVE0010 | <b>Study Code:</b> | EFC12405 |
|----------------------|----------------|--------------------|----------|

| Study Center No. | Investigator last name and first name* | Role in the Investigation        | Professional Degree(s) | Institutional Affiliation(s)                                                                                      |
|------------------|----------------------------------------|----------------------------------|------------------------|-------------------------------------------------------------------------------------------------------------------|
| 840550           | Soler Daniel                           | Sub-Investigator/Co-Investigator | MA,CRC                 | Catalina Research Institute LLC<br>14726 Ramona Ave<br>Suite 110<br>Chino<br>91710<br>California<br>UNITED STATES |
| 840550           | Unger Jeffrey                          | Principal Investigator           | MD                     | Catalina Research Institute LLC<br>14726 Ramona Ave<br>Suite 110<br>Chino<br>91710<br>California<br>UNITED STATES |
| 840550           | Valenzuela Louisito                    | Sub-Investigator/Co-Investigator | MA,CRC                 | Catalina Research Institute LLC<br>14726 Ramona Ave<br>Suite 110<br>Chino<br>91710<br>California<br>UNITED STATES |

\*CV provided as attachment to this appendix for all principal investigators

*Ensure that the printed copy of this document is the current version available on the Intranet.*

Property of the Sanofi Group - strictly confidential

Version Number: 4.0

28-JUL-2015

# SUPPLEMENTARY DATA

LIST OF PRINCIPAL INVESTIGATOR(S) AND SUB-INVESTIGATOR(S) PER STUDY SITE WHERE PATIENTS WERE ENROLLED

QSD-002219

Page 145 of 218

|                      |                |                    |          |
|----------------------|----------------|--------------------|----------|
| <b>Product Code:</b> | HOE901/AVE0010 | <b>Study Code:</b> | EFC12405 |
|----------------------|----------------|--------------------|----------|

| Study Center No. | Investigator last name and first name* | Role in the Investigation        | Professional Degree(s) | Institutional Affiliation(s)                                                                                      |
|------------------|----------------------------------------|----------------------------------|------------------------|-------------------------------------------------------------------------------------------------------------------|
| 840550           | Martinez Geraldine                     | Sub-Investigator/Co-Investigator | MSN, RN                | Catalina Research Institute LLC<br>14726 Ramona Ave<br>Suite 110<br>Chino<br>91710<br>California<br>UNITED STATES |
| 840551           | Goisie Marcy                           | Principal Investigator           | MD                     | Montgomery Medical Inc<br>100 Ridge View Drive<br>Smithfield<br>15478<br>Pennsylvania<br>UNITED STATES            |
| 840551           | Rua Michael David                      | Sub-Investigator/Co-Investigator | PAC                    | Montgomery Medical Inc<br>100 Ridge View Drive<br>Smithfield<br>15478<br>Pennsylvania<br>UNITED STATES            |
| 840551           | Taylor Judith                          | Sub-Investigator/Co-Investigator | MD                     | Montgomery Medical Inc<br>100 Ridge View Drive<br>Smithfield<br>15478<br>Pennsylvania<br>UNITED STATES            |

\*CV provided as attachment to this appendix for all principal investigators

*Ensure that the printed copy of this document is the current version available on the Intranet.*

Property of the Sanofi Group - strictly confidential

Version Number: 4.0

28-JUL-2015

# SUPPLEMENTARY DATA

LIST OF PRINCIPAL INVESTIGATOR(S) AND SUB-INVESTIGATOR(S) PER STUDY SITE WHERE PATIENTS WERE ENROLLED

QSD-002219

Page 146 of 218

|               |                |             |          |
|---------------|----------------|-------------|----------|
| Product Code: | HOE901/AVE0010 | Study Code: | EFC12405 |
|---------------|----------------|-------------|----------|

| Study Center No. | Investigator last name and first name* | Role in the Investigation        | Professional Degree(s) | Institutional Affiliation(s)                                                                                                |
|------------------|----------------------------------------|----------------------------------|------------------------|-----------------------------------------------------------------------------------------------------------------------------|
| 840552           | Bernstein Richard                      | Principal Investigator           | MD                     | Marin Endocrine Care And Research<br>900 S Eliseo Dr.<br>Suite 201<br>Greenbrae<br>94904<br>California<br>UNITED STATES     |
| 840552           | Gaudiani Linda                         | Sub-Investigator/Co-Investigator | MD                     | Marin Endocrine Care And Research<br>900 S Eliseo Dr.<br>Suite 201<br>Greenbrae<br>94904<br>California<br>UNITED STATES     |
| 840553           | Blevins Thomas                         | Principal Investigator           | MD                     | Texas Diabetes & Endocrinology<br>6500 MoPac Expwy<br>Building. III, Suite 200<br>Austin<br>78731<br>Texas<br>UNITED STATES |

\*CV provided as attachment to this appendix for all principal investigators

*Ensure that the printed copy of this document is the current version available on the Intranet.*

Property of the Sanofi Group - strictly confidential

Version Number: 4.0

28-JUL-2015

# SUPPLEMENTARY DATA

LIST OF PRINCIPAL INVESTIGATOR(S) AND SUB-INVESTIGATOR(S) PER STUDY SITE WHERE PATIENTS WERE ENROLLED

QSD-002219

Page 147 of 218

|                      |                |                    |          |
|----------------------|----------------|--------------------|----------|
| <b>Product Code:</b> | HOE901/AVE0010 | <b>Study Code:</b> | EFC12405 |
|----------------------|----------------|--------------------|----------|

| Study Center No. | Investigator last name and first name* | Role in the Investigation        | Professional Degree(s) | Institutional Affiliation(s)                                                                                                |
|------------------|----------------------------------------|----------------------------------|------------------------|-----------------------------------------------------------------------------------------------------------------------------|
| 840553           | Casaubon Luis                          | Sub-Investigator/Co-Investigator | MD                     | Texas Diabetes & Endocrinology<br>6500 MoPac Expwy<br>Building. III, Suite 200<br>Austin<br>78731<br>Texas<br>UNITED STATES |
| 840553           | Espinosa Valerie                       | Sub-Investigator/Co-Investigator | MD                     | Texas Diabetes & Endocrinology<br>6500 MoPac Expwy<br>Building. III, Suite 200<br>Austin<br>78731<br>Texas<br>UNITED STATES |
| 840553           | Harrison Lindsay                       | Sub-Investigator/Co-Investigator | MD                     | Texas Diabetes & Endocrinology<br>6500 MoPac Expwy<br>Building. III, Suite 200<br>Austin<br>78731<br>Texas<br>UNITED STATES |

\*CV provided as attachment to this appendix for all principal investigators

*Ensure that the printed copy of this document is the current version available on the Intranet.*

Property of the Sanofi Group - strictly confidential

Version Number: 4.0

28-JUL-2015

# SUPPLEMENTARY DATA

LIST OF PRINCIPAL INVESTIGATOR(S) AND SUB-INVESTIGATOR(S) PER STUDY SITE WHERE PATIENTS WERE ENROLLED

QSD-002219

Page 148 of 218

|                      |                |                    |          |
|----------------------|----------------|--------------------|----------|
| <b>Product Code:</b> | HOE901/AVE0010 | <b>Study Code:</b> | EFC12405 |
|----------------------|----------------|--------------------|----------|

| Study Center No. | Investigator last name and first name* | Role in the Investigation        | Professional Degree(s) | Institutional Affiliation(s)                                                                                                |
|------------------|----------------------------------------|----------------------------------|------------------------|-----------------------------------------------------------------------------------------------------------------------------|
| 840553           | Chaicha-Brom Tira                      | Sub-Investigator/Co-Investigator | MD                     | Texas Diabetes & Endocrinology<br>6500 MoPac Expwy<br>Building. III, Suite 200<br>Austin<br>78731<br>Texas<br>UNITED STATES |
| 840553           | Riesch Louie                           | Sub-Investigator/Co-Investigator | RN, MSN                | Texas Diabetes & Endocrinology<br>6500 MoPac Expwy<br>Building. III, Suite 200<br>Austin<br>78731<br>Texas<br>UNITED STATES |
| 840554           | Cordoba Kissee Michelle Lynn           | Sub-Investigator/Co-Investigator | MD                     | Renaissance Medical Foundation<br>5525 Doctors Drive<br>Edinburg<br>78539<br>Texas<br>UNITED STATES                         |
| 840554           | Twahirwa Marcel                        | Principal Investigator           | MD                     | Renaissance Medical Foundation<br>5525 Doctors Drive<br>Edinburg<br>78539<br>Texas<br>UNITED STATES                         |

\*CV provided as attachment to this appendix for all principal investigators

*Ensure that the printed copy of this document is the current version available on the Intranet.*

Property of the Sanofi Group - strictly confidential

Version Number: 4.0

28-JUL-2015

# SUPPLEMENTARY DATA

LIST OF PRINCIPAL INVESTIGATOR(S) AND SUB-INVESTIGATOR(S) PER STUDY SITE WHERE PATIENTS WERE ENROLLED

QSD-002219

Page 149 of 218

|                      |                |                    |          |
|----------------------|----------------|--------------------|----------|
| <b>Product Code:</b> | HOE901/AVE0010 | <b>Study Code:</b> | EFC12405 |
|----------------------|----------------|--------------------|----------|

| Study Center No. | Investigator last name and first name* | Role in the Investigation        | Professional Degree(s) | Institutional Affiliation(s)                                                                                                                               |
|------------------|----------------------------------------|----------------------------------|------------------------|------------------------------------------------------------------------------------------------------------------------------------------------------------|
| 840556           | Backus Arnetta                         | Sub-Investigator/Co-Investigator | RN                     | HSHF Medical Group Inc.<br>D/B/A Springfield Diabetes and Endocrine Center<br>2501 Chatham Road,<br>Suite 300,<br>62704<br>Springfield IL<br>UNITED STATES |
| 840556           | Dukett Mary                            | Sub-Investigator/Co-Investigator | RN, SC                 | HSHF Medical Group Inc.<br>D/B/A Springfield Diabetes and Endocrine Center<br>2501 Chatham Road,<br>Suite 300,<br>62704<br>Springfield IL<br>UNITED STATES |
| 840556           | Jayaramaiah Poornima                   | Sub-Investigator/Co-Investigator | MD                     | HSHF Medical Group Inc.<br>D/B/A Springfield Diabetes and Endocrine Center<br>2501 Chatham Road,<br>Suite 300,<br>62704<br>Springfield IL<br>UNITED STATES |

\*CV provided as attachment to this appendix for all principal investigators

*Ensure that the printed copy of this document is the current version available on the Intranet.*

Property of the Sanofi Group - strictly confidential

Version Number: 4.0

28-JUL-2015



# SUPPLEMENTARY DATA

LIST OF PRINCIPAL INVESTIGATOR(S) AND SUB-INVESTIGATOR(S) PER STUDY SITE WHERE PATIENTS WERE ENROLLED

QSD-002219

Page 150 of 218

|                      |                |                    |          |
|----------------------|----------------|--------------------|----------|
| <b>Product Code:</b> | HOE901/AVE0010 | <b>Study Code:</b> | EFC12405 |
|----------------------|----------------|--------------------|----------|

| Study Center No. | Investigator last name and first name* | Role in the Investigation        | Professional Degree(s) | Institutional Affiliation(s)                                                                                                                               |
|------------------|----------------------------------------|----------------------------------|------------------------|------------------------------------------------------------------------------------------------------------------------------------------------------------|
| 840556           | McCall Linda                           | Sub-Investigator/Co-Investigator | MS, FNP                | HSHF Medical Group Inc.<br>D/B/A Springfield Diabetes and Endocrine Center<br>2501 Chatham Road,<br>Suite 300,<br>62704<br>Springfield IL<br>UNITED STATES |
| 840556           | Mikell Frank                           | Principal Investigator           | MD                     | HSHF Medical Group Inc.<br>D/B/A Springfield Diabetes and Endocrine Center<br>2501 Chatham Road,<br>Suite 300,<br>62704<br>Springfield IL<br>UNITED STATES |
| 840556           | Nallala Deepika                        | Sub-Investigator/Co-Investigator | MD                     | HSHF Medical Group Inc.<br>D/B/A Springfield Diabetes and Endocrine Center<br>2501 Chatham Road,<br>Suite 300,<br>62704<br>Springfield IL<br>UNITED STATES |

\*CV provided as attachment to this appendix for all principal investigators

*Ensure that the printed copy of this document is the current version available on the Intranet.*

Property of the Sanofi Group - strictly confidential

Version Number: 4.0

28-JUL-2015

# SUPPLEMENTARY DATA

LIST OF PRINCIPAL INVESTIGATOR(S) AND SUB-INVESTIGATOR(S) PER STUDY SITE WHERE PATIENTS WERE ENROLLED

QSD-002219

Page 151 of 218

|               |                |             |          |
|---------------|----------------|-------------|----------|
| Product Code: | HOE901/AVE0010 | Study Code: | EFC12405 |
|---------------|----------------|-------------|----------|

| Study Center No. | Investigator last name and first name* | Role in the Investigation        | Professional Degree(s) | Institutional Affiliation(s)                                                                                                                  |
|------------------|----------------------------------------|----------------------------------|------------------------|-----------------------------------------------------------------------------------------------------------------------------------------------|
| 840557           | Weinstock Ruth                         | Principal Investigator           | PhD,MD                 | SUNY Upstate Medical University, Clinical Research Unit, Institute for Human Performance, 505 Irving Avenue, Syracuse, 13210 NY UNITED STATES |
| 840557           | Izquierdo Roberto                      | Sub-Investigator/Co-Investigator | MD                     | SUNY Upstate Medical University, Clinical Research Unit, Institute for Human Performance, 505 Irving Avenue, Syracuse, 13210 NY UNITED STATES |
| 840558           | Pullman John                           | Principal Investigator           | MD                     | Mercury Street Medical Research 300 W Mercury St. Butte 59701 Montana UNITED STATES                                                           |
| 840558           | Williams-Leber Erin                    | Sub-Investigator/Co-Investigator | PA-C                   | Mercury Street Medical Research 300 W Mercury St. Butte 59701 Montana UNITED STATES                                                           |

\*CV provided as attachment to this appendix for all principal investigators

*Ensure that the printed copy of this document is the current version available on the Intranet.*

Property of the Sanofi Group - strictly confidential

Version Number: 4.0

28-JUL-2015

# SUPPLEMENTARY DATA

LIST OF PRINCIPAL INVESTIGATOR(S) AND SUB-INVESTIGATOR(S) PER STUDY SITE WHERE PATIENTS WERE ENROLLED

QSD-002219

Page 152 of 218

|                      |                |                    |          |
|----------------------|----------------|--------------------|----------|
| <b>Product Code:</b> | HOE901/AVE0010 | <b>Study Code:</b> | EFC12405 |
|----------------------|----------------|--------------------|----------|

| Study Center No. | Investigator last name and first name* | Role in the Investigation        | Professional Degree(s) | Institutional Affiliation(s)                                                                     |
|------------------|----------------------------------------|----------------------------------|------------------------|--------------------------------------------------------------------------------------------------|
| 840559           | Custodio Ryan                          | Sub-Investigator/Co-Investigator | BS,MS                  | Saviors Medical Group<br>246 E Scott St.<br>Port Hueneme<br>93041<br>California<br>UNITED STATES |
| 840559           | Shapiro Zoya                           | Sub-Investigator/Co-Investigator | LPN                    | Saviors Medical Group<br>246 E Scott St.<br>Port Hueneme<br>93041<br>California<br>UNITED STATES |
| 840559           | Soroka Eugene                          | Principal Investigator           | MD                     | Saviors Medical Group<br>246 E Scott St.<br>Port Hueneme<br>93041<br>California<br>UNITED STATES |
| 840559           | Steinberg Alon                         | Sub-Investigator/Co-Investigator | MD                     | Saviors Medical Group<br>246 E Scott St.<br>Port Hueneme<br>93041<br>California<br>UNITED STATES |

\*CV provided as attachment to this appendix for all principal investigators

*Ensure that the printed copy of this document is the current version available on the Intranet.*

Property of the Sanofi Group - strictly confidential

Version Number: 4.0

28-JUL-2015

# SUPPLEMENTARY DATA

LIST OF PRINCIPAL INVESTIGATOR(S) AND SUB-INVESTIGATOR(S) PER STUDY SITE WHERE PATIENTS WERE ENROLLED

QSD-002219

Page 153 of 218

|                      |                |                    |          |
|----------------------|----------------|--------------------|----------|
| <b>Product Code:</b> | HOE901/AVE0010 | <b>Study Code:</b> | EFC12405 |
|----------------------|----------------|--------------------|----------|

| Study Center No. | Investigator last name and first name* | Role in the Investigation        | Professional Degree(s) | Institutional Affiliation(s)                                                                                                     |
|------------------|----------------------------------------|----------------------------------|------------------------|----------------------------------------------------------------------------------------------------------------------------------|
| 840560           | Magee Michelle                         | Principal Investigator           | MD                     | MedStar Health Research Institute<br>100 Irving St. NW<br>Eb4114<br>Washington<br>20010<br>District of Columbia<br>UNITED STATES |
| 840560           | Reyes-Castano John                     | Sub-Investigator/Co-Investigator | MD                     | MedStar Health Research Institute<br>100 Irving St. NW<br>Eb4114<br>Washington<br>20010<br>District of Columbia<br>UNITED STATES |
| 840561           | Bourcier Matthew                       | Sub-Investigator/Co-Investigator | PA-C                   | Eastern Virginia Medical School, Strelitz Diabetes Center, 855 West Brambleton Avenue,<br>23510<br>Norfolk VA<br>UNITED STATES   |
| 840561           | Casellini Carolina                     | Sub-Investigator/Co-Investigator | MD                     | Eastern Virginia Medical School, Strelitz Diabetes Center, 855 West Brambleton Avenue,<br>23510<br>Norfolk VA<br>UNITED STATES   |

\*CV provided as attachment to this appendix for all principal investigators

*Ensure that the printed copy of this document is the current version available on the Intranet.*

Property of the Sanofi Group - strictly confidential

Version Number: 4.0

28-JUL-2015

# SUPPLEMENTARY DATA

LIST OF PRINCIPAL INVESTIGATOR(S) AND SUB-INVESTIGATOR(S) PER STUDY SITE WHERE PATIENTS WERE ENROLLED

QSD-002219

Page 154 of 218

|                      |                |                    |          |
|----------------------|----------------|--------------------|----------|
| <b>Product Code:</b> | HOE901/AVE0010 | <b>Study Code:</b> | EFC12405 |
|----------------------|----------------|--------------------|----------|

| Study Center No. | Investigator last name and first name* | Role in the Investigation        | Professional Degree(s) | Institutional Affiliation(s)                                                                                               |
|------------------|----------------------------------------|----------------------------------|------------------------|----------------------------------------------------------------------------------------------------------------------------|
| 840561           | Vinik Aaron                            | Principal Investigator           | MD, PhD                | Eastern Virginia Medical School, Strelitz Diabetes Center, 855 West Brambleton Avenue, 23510 Norfolk VA UNITED STATES      |
| 840562           | Anthony Claire Marie                   | Sub-Investigator/Co-Investigator | MS                     | Clinical Research Advantage, Inc Fiel Family and Sports Medicine, PC 1840 East Baseline Road, 85283 Tempe AZ UNITED STATES |
| 840562           | Cadwell Kristina Ann                   | Sub-Investigator/Co-Investigator | MS                     | Clinical Research Advantage, Inc Fiel Family and Sports Medicine, PC 1840 East Baseline Road, 85283 Tempe AZ UNITED STATES |
| 840562           | Congdon Erin                           | Sub-Investigator/Co-Investigator | CRC                    | Clinical Research Advantage, Inc Fiel Family and Sports Medicine, PC 1840 East Baseline Road, 85283 Tempe AZ UNITED STATES |

\*CV provided as attachment to this appendix for all principal investigators

*Ensure that the printed copy of this document is the current version available on the Intranet.*

Property of the Sanofi Group - strictly confidential

Version Number: 4.0

28-JUL-2015

# SUPPLEMENTARY DATA

LIST OF PRINCIPAL INVESTIGATOR(S) AND SUB-INVESTIGATOR(S) PER STUDY SITE WHERE PATIENTS WERE ENROLLED

QSD-002219

Page 155 of 218

|                      |                |                    |          |
|----------------------|----------------|--------------------|----------|
| <b>Product Code:</b> | HOE901/AVE0010 | <b>Study Code:</b> | EFC12405 |
|----------------------|----------------|--------------------|----------|

| Study Center No. | Investigator last name and first name* | Role in the Investigation        | Professional Degree(s) | Institutional Affiliation(s)                                                                                                              |
|------------------|----------------------------------------|----------------------------------|------------------------|-------------------------------------------------------------------------------------------------------------------------------------------|
| 840562           | Clayson Danielle                       | Sub-Investigator/Co-Investigator | CRC                    | Clinical Research Advantage, Inc<br>Fiel Family and Sports Medicine, PC<br>1840 East Baseline Road,<br>85283<br>Tempe AZ<br>UNITED STATES |
| 840562           | Di Tullio-Merrill Nicole Kristine      | Sub-Investigator/Co-Investigator | BS,RN                  | Clinical Research Advantage, Inc<br>Fiel Family and Sports Medicine, PC<br>1840 East Baseline Road,<br>85283<br>Tempe AZ<br>UNITED STATES |
| 840562           | Fiel Thomas                            | Principal Investigator           | DO                     | Clinical Research Advantage, Inc<br>Fiel Family and Sports Medicine, PC<br>1840 East Baseline Road,<br>85283<br>Tempe AZ<br>UNITED STATES |
| 840562           | Kelln Christine                        | Sub-Investigator/Co-Investigator | CCRC                   | Clinical Research Advantage, Inc<br>Fiel Family and Sports Medicine, PC<br>1840 East Baseline Road,<br>85283<br>Tempe AZ<br>UNITED STATES |

\*CV provided as attachment to this appendix for all principal investigators

*Ensure that the printed copy of this document is the current version available on the Intranet.*

Property of the Sanofi Group - strictly confidential

Version Number: 4.0

28-JUL-2015

# SUPPLEMENTARY DATA

LIST OF PRINCIPAL INVESTIGATOR(S) AND SUB-INVESTIGATOR(S) PER STUDY SITE WHERE PATIENTS WERE ENROLLED

QSD-002219

Page 156 of 218

|                      |                |                    |          |
|----------------------|----------------|--------------------|----------|
| <b>Product Code:</b> | HOE901/AVE0010 | <b>Study Code:</b> | EFC12405 |
|----------------------|----------------|--------------------|----------|

| Study Center No. | Investigator last name and first name* | Role in the Investigation        | Professional Degree(s) | Institutional Affiliation(s)                                                                                                              |
|------------------|----------------------------------------|----------------------------------|------------------------|-------------------------------------------------------------------------------------------------------------------------------------------|
| 840562           | Lopez Jessica                          | Sub-Investigator/Co-Investigator | CRC                    | Clinical Research Advantage, Inc<br>Fiel Family and Sports Medicine, PC<br>1840 East Baseline Road,<br>85283<br>Tempe AZ<br>UNITED STATES |
| 840562           | Raban Trisha                           | Sub-Investigator/Co-Investigator | CCRP                   | Clinical Research Advantage, Inc<br>Fiel Family and Sports Medicine, PC<br>1840 East Baseline Road,<br>85283<br>Tempe AZ<br>UNITED STATES |
| 840563           | Mariash Cary                           | Principal Investigator           | MD                     | Methodist Hospital of Indiana<br>1812 N Capitol Ave.<br>Suite 120<br>Indianapolis<br>46202<br>Indiana<br>UNITED STATES                    |
| 840563           | Meacham James                          | Sub-Investigator/Co-Investigator | MD                     | Methodist Hospital of Indiana<br>1812 N Capitol Ave.<br>Suite 120<br>Indianapolis<br>46202<br>Indiana<br>UNITED STATES                    |

\*CV provided as attachment to this appendix for all principal investigators

*Ensure that the printed copy of this document is the current version available on the Intranet.*

Property of the Sanofi Group - strictly confidential

Version Number: 4.0

28-JUL-2015

# SUPPLEMENTARY DATA

LIST OF PRINCIPAL INVESTIGATOR(S) AND SUB-INVESTIGATOR(S) PER STUDY SITE WHERE PATIENTS WERE ENROLLED

QSD-002219

Page 157 of 218

|               |                |             |          |
|---------------|----------------|-------------|----------|
| Product Code: | HOE901/AVE0010 | Study Code: | EFC12405 |
|---------------|----------------|-------------|----------|

| Study Center No. | Investigator last name and first name* | Role in the Investigation        | Professional Degree(s) | Institutional Affiliation(s)                                                                                                                         |
|------------------|----------------------------------------|----------------------------------|------------------------|------------------------------------------------------------------------------------------------------------------------------------------------------|
| 840564           | Bergenstal Richard                     | Principal Investigator           | MD                     | Institute For Research & Education<br>International Diabetes Center<br>3800 Park Nicollet Blvd<br>Minneapolis<br>55416<br>Minnesota<br>UNITED STATES |
| 840564           | Jensen Connie                          | Sub-Investigator/Co-Investigator | RN                     | Institute For Research & Education<br>International Diabetes Center<br>3800 Park Nicollet Blvd<br>Minneapolis<br>55416<br>Minnesota<br>UNITED STATES |
| 840564           | Madden Marcia                          | Sub-Investigator/Co-Investigator | MPH                    | Institute For Research & Education<br>International Diabetes Center<br>3800 Park Nicollet Blvd<br>Minneapolis<br>55416<br>Minnesota<br>UNITED STATES |

\*CV provided as attachment to this appendix for all principal investigators

*Ensure that the printed copy of this document is the current version available on the Intranet.*

Property of the Sanofi Group - strictly confidential

Version Number: 4.0

28-JUL-2015



# SUPPLEMENTARY DATA

LIST OF PRINCIPAL INVESTIGATOR(S) AND SUB-INVESTIGATOR(S) PER STUDY SITE WHERE PATIENTS WERE ENROLLED

QSD-002219

Page 158 of 218

|                      |                |                    |          |
|----------------------|----------------|--------------------|----------|
| <b>Product Code:</b> | HOE901/AVE0010 | <b>Study Code:</b> | EFC12405 |
|----------------------|----------------|--------------------|----------|

| Study Center No. | Investigator last name and first name* | Role in the Investigation        | Professional Degree(s) | Institutional Affiliation(s)                                                                                                                         |
|------------------|----------------------------------------|----------------------------------|------------------------|------------------------------------------------------------------------------------------------------------------------------------------------------|
| 840564           | Strock Elinor                          | Sub-Investigator/Co-Investigator | ANP-BC                 | Institute For Research & Education<br>International Diabetes Center<br>3800 Park Nicollet Blvd<br>Minneapolis<br>55416<br>Minnesota<br>UNITED STATES |
| 840565           | Allababidi Hisham                      | Sub-Investigator/Co-Investigator | MD                     | Deaconess Clinic Downtown Research Institute,<br>421 Chestnut Street,<br>Evansville, IN<br>47713<br>UNITED STATES                                    |
| 840565           | Graves Mark                            | Sub-Investigator/Co-Investigator | MD                     | Deaconess Clinic Downtown Research Institute,<br>421 Chestnut Street,<br>Evansville, IN<br>47713<br>UNITED STATES                                    |
| 840565           | Siage Youssef                          | Sub-Investigator/Co-Investigator | MD                     | Deaconess Clinic Downtown Research Institute,<br>421 Chestnut Street,<br>Evansville, IN<br>47713<br>UNITED STATES                                    |

\*CV provided as attachment to this appendix for all principal investigators

*Ensure that the printed copy of this document is the current version available on the Intranet.*

Property of the Sanofi Group - strictly confidential

Version Number: 4.0

28-JUL-2015

# SUPPLEMENTARY DATA

LIST OF PRINCIPAL INVESTIGATOR(S) AND SUB-INVESTIGATOR(S) PER STUDY SITE WHERE PATIENTS WERE ENROLLED

QSD-002219

Page 159 of 218

|                      |                |                    |          |
|----------------------|----------------|--------------------|----------|
| <b>Product Code:</b> | HOE901/AVE0010 | <b>Study Code:</b> | EFC12405 |
|----------------------|----------------|--------------------|----------|

| Study Center No. | Investigator last name and first name* | Role in the Investigation        | Professional Degree(s) | Institutional Affiliation(s)                                                                                                   |
|------------------|----------------------------------------|----------------------------------|------------------------|--------------------------------------------------------------------------------------------------------------------------------|
| 840565           | Thieneman Andrew                       | Principal Investigator           | MD                     | Deaconess Clinic Downtown Research Institute,<br>421 Chestnut Street,<br>Evansville, IN<br>47713<br>UNITED STATES              |
| 840566           | Flowe Chelsea                          | Sub-Investigator/Co-Investigator | FNP                    | Valley Research<br>550 E Herndon Ave.<br>Suite 101<br>Fresno<br>93720<br>California<br>UNITED STATES                           |
| 840566           | Norwood Paul                           | Principal Investigator           | MD                     | Valley Research<br>550 E Herndon Ave.<br>Suite 101<br>Fresno<br>93720<br>California<br>UNITED STATES                           |
| 840567           | Chueh Daniel                           | Sub-Investigator/Co-Investigator | MD                     | Helping Hands Medical Associates, Inc.<br>2621 S Bristol St.<br>Suite 307<br>Santa Ana<br>92704<br>California<br>UNITED STATES |

\*CV provided as attachment to this appendix for all principal investigators

*Ensure that the printed copy of this document is the current version available on the Intranet.*

Property of the Sanofi Group - strictly confidential

Version Number: 4.0

28-JUL-2015

# SUPPLEMENTARY DATA

LIST OF PRINCIPAL INVESTIGATOR(S) AND SUB-INVESTIGATOR(S) PER STUDY SITE WHERE PATIENTS WERE ENROLLED

QSD-002219

Page 160 of 218

|               |                |             |          |
|---------------|----------------|-------------|----------|
| Product Code: | HOE901/AVE0010 | Study Code: | EFC12405 |
|---------------|----------------|-------------|----------|

| Study Center No. | Investigator last name and first name* | Role in the Investigation        | Professional Degree(s) | Institutional Affiliation(s)                                                                                                   |
|------------------|----------------------------------------|----------------------------------|------------------------|--------------------------------------------------------------------------------------------------------------------------------|
| 840567           | Schwartz Alan                          | Principal Investigator           | MD                     | Helping Hands Medical Associates, Inc.<br>2621 S Bristol St.<br>Suite 307<br>Santa Ana<br>92704<br>California<br>UNITED STATES |
| 840568           | Salem Galal                            | Principal Investigator           | MD                     | SunRise Clinical Research<br>5985 Florence Ave.<br>Suite N<br>Bell Gardens<br>90201<br>California<br>UNITED STATES             |
| 840568           | Hafez Mohamed                          | Sub-Investigator/Co-Investigator | MD                     | SunRise Clinical Research<br>5985 Florence Ave.<br>Suite N<br>Bell Gardens<br>90201<br>California<br>UNITED STATES             |

\*CV provided as attachment to this appendix for all principal investigators

*Ensure that the printed copy of this document is the current version available on the Intranet.*

Property of the Sanofi Group - strictly confidential

Version Number: 4.0

28-JUL-2015

# SUPPLEMENTARY DATA

LIST OF PRINCIPAL INVESTIGATOR(S) AND SUB-INVESTIGATOR(S) PER STUDY SITE WHERE PATIENTS WERE ENROLLED

QSD-002219

Page 161 of 218

|                      |                |                    |          |
|----------------------|----------------|--------------------|----------|
| <b>Product Code:</b> | HOE901/AVE0010 | <b>Study Code:</b> | EFC12405 |
|----------------------|----------------|--------------------|----------|

| Study Center No. | Investigator last name and first name* | Role in the Investigation        | Professional Degree(s) | Institutional Affiliation(s)                                                                                      |
|------------------|----------------------------------------|----------------------------------|------------------------|-------------------------------------------------------------------------------------------------------------------|
| 840569           | Delkhah Shahin                         | Sub-Investigator/Co-Investigator | MD                     | Metabolic Institute Of America<br>18372 Clark St.<br>Suite 212<br>Tarzana<br>91356<br>California<br>UNITED STATES |
| 840569           | Handelsman Yehuda                      | Principal Investigator           | MD                     | Metabolic Institute Of America<br>18372 Clark St.<br>Suite 212<br>Tarzana<br>91356<br>California<br>UNITED STATES |
| 840570           | Anderson Corey                         | Sub-Investigator/Co-Investigator | MD                     | Dedicated Clinical Research<br>13555 W McDowell Rd.<br>Suite 209<br>Goodyear<br>85395<br>Arizona<br>UNITED STATES |

\*CV provided as attachment to this appendix for all principal investigators

*Ensure that the printed copy of this document is the current version available on the Intranet.*

Property of the Sanofi Group - strictly confidential

Version Number: 4.0

28-JUL-2015

# SUPPLEMENTARY DATA

LIST OF PRINCIPAL INVESTIGATOR(S) AND SUB-INVESTIGATOR(S) PER STUDY SITE WHERE PATIENTS WERE ENROLLED

QSD-002219

Page 162 of 218

|                      |                |                    |          |
|----------------------|----------------|--------------------|----------|
| <b>Product Code:</b> | HOE901/AVE0010 | <b>Study Code:</b> | EFC12405 |
|----------------------|----------------|--------------------|----------|

| Study Center No. | Investigator last name and first name* | Role in the Investigation        | Professional Degree(s) | Institutional Affiliation(s)                                                                                      |
|------------------|----------------------------------------|----------------------------------|------------------------|-------------------------------------------------------------------------------------------------------------------|
| 840570           | Hsu Connie                             | Principal Investigator           | MD                     | Dedicated Clinical Research<br>13555 W McDowell Rd.<br>Suite 209<br>Goodyear<br>85395<br>Arizona<br>UNITED STATES |
| 840570           | Lonquist Mark                          | Sub-Investigator/Co-Investigator | MD                     | Dedicated Clinical Research<br>13555 W McDowell Rd.<br>Suite 209<br>Goodyear<br>85395<br>Arizona<br>UNITED STATES |
| 840570           | Mather Dana                            | Sub-Investigator/Co-Investigator | MSN                    | Dedicated Clinical Research<br>13555 W McDowell Rd.<br>Suite 209<br>Goodyear<br>85395<br>Arizona<br>UNITED STATES |

\*CV provided as attachment to this appendix for all principal investigators

*Ensure that the printed copy of this document is the current version available on the Intranet.*

Property of the Sanofi Group - strictly confidential

Version Number: 4.0

28-JUL-2015

# SUPPLEMENTARY DATA

LIST OF PRINCIPAL INVESTIGATOR(S) AND SUB-INVESTIGATOR(S) PER STUDY SITE WHERE PATIENTS WERE ENROLLED

QSD-002219

Page 163 of 218

|                      |                |                    |          |
|----------------------|----------------|--------------------|----------|
| <b>Product Code:</b> | HOE901/AVE0010 | <b>Study Code:</b> | EFC12405 |
|----------------------|----------------|--------------------|----------|

| Study Center No. | Investigator last name and first name* | Role in the Investigation        | Professional Degree(s) | Institutional Affiliation(s)                                                                                               |
|------------------|----------------------------------------|----------------------------------|------------------------|----------------------------------------------------------------------------------------------------------------------------|
| 840571           | Miller Marcia                          | Sub-Investigator/Co-Investigator | ARNP                   | Stonesifer Research<br>34509 9th Ave. S<br>Suite 203A<br>Federal Way<br>98003<br>Washington<br>UNITED STATES               |
| 840571           | Stonesifer Larry                       | Principal Investigator           | MD                     | Stonesifer Research<br>34509 9th Ave. S<br>Suite 203A<br>Federal Way<br>98003<br>Washington<br>UNITED STATES               |
| 840572           | Ducca Michelle                         | Sub-Investigator/Co-Investigator | BS                     | Infosphere Clinical Research<br>7345 Medical Center Dr.<br>Suite 310<br>West Hills<br>91345<br>California<br>UNITED STATES |

\*CV provided as attachment to this appendix for all principal investigators

*Ensure that the printed copy of this document is the current version available on the Intranet.*

Property of the Sanofi Group - strictly confidential

Version Number: 4.0

28-JUL-2015

# SUPPLEMENTARY DATA

LIST OF PRINCIPAL INVESTIGATOR(S) AND SUB-INVESTIGATOR(S) PER STUDY SITE WHERE PATIENTS WERE ENROLLED

QSD-002219

Page 164 of 218

|                      |                |                    |          |
|----------------------|----------------|--------------------|----------|
| <b>Product Code:</b> | HOE901/AVE0010 | <b>Study Code:</b> | EFC12405 |
|----------------------|----------------|--------------------|----------|

| Study Center No. | Investigator last name and first name* | Role in the Investigation        | Professional Degree(s) | Institutional Affiliation(s)                                                                                               |
|------------------|----------------------------------------|----------------------------------|------------------------|----------------------------------------------------------------------------------------------------------------------------|
| 840572           | Fittingoff David Bruce                 | Sub-Investigator/Co-Investigator | MD                     | Infosphere Clinical Research<br>7345 Medical Center Dr.<br>Suite 310<br>West Hills<br>91345<br>California<br>UNITED STATES |
| 840572           | Iqbal Mohammed Imran                   | Sub-Investigator/Co-Investigator | MD                     | Infosphere Clinical Research<br>7345 Medical Center Dr.<br>Suite 310<br>West Hills<br>91345<br>California<br>UNITED STATES |
| 840572           | Sisneros Edith                         | Sub-Investigator/Co-Investigator | CRC                    | Infosphere Clinical Research<br>7345 Medical Center Dr.<br>Suite 310<br>West Hills<br>91345<br>California<br>UNITED STATES |

\*CV provided as attachment to this appendix for all principal investigators

*Ensure that the printed copy of this document is the current version available on the Intranet.*

Property of the Sanofi Group - strictly confidential

Version Number: 4.0

28-JUL-2015

# SUPPLEMENTARY DATA

LIST OF PRINCIPAL INVESTIGATOR(S) AND SUB-INVESTIGATOR(S) PER STUDY SITE WHERE PATIENTS WERE ENROLLED

QSD-002219

Page 165 of 218

|                      |                |                    |          |
|----------------------|----------------|--------------------|----------|
| <b>Product Code:</b> | HOE901/AVE0010 | <b>Study Code:</b> | EFC12405 |
|----------------------|----------------|--------------------|----------|

| Study Center No. | Investigator last name and first name* | Role in the Investigation        | Professional Degree(s) | Institutional Affiliation(s)                                                                                               |
|------------------|----------------------------------------|----------------------------------|------------------------|----------------------------------------------------------------------------------------------------------------------------|
| 840572           | Streja Dan                             | Principal Investigator           | MD                     | Infosphere Clinical Research<br>7345 Medical Center Dr.<br>Suite 310<br>West Hills<br>91345<br>California<br>UNITED STATES |
| 840572           | Streja David                           | Sub-Investigator/Co-Investigator | DXA Technician         | Infosphere Clinical Research<br>7345 Medical Center Dr.<br>Suite 310<br>West Hills<br>91345<br>California<br>UNITED STATES |
| 840572           | White Stephen Ronald                   | Sub-Investigator/Co-Investigator | MD                     | Infosphere Clinical Research<br>7345 Medical Center Dr.<br>Suite 310<br>West Hills<br>91345<br>California<br>UNITED STATES |

\*CV provided as attachment to this appendix for all principal investigators

*Ensure that the printed copy of this document is the current version available on the Intranet.*

Property of the Sanofi Group - strictly confidential

Version Number: 4.0

28-JUL-2015



# SUPPLEMENTARY DATA

LIST OF PRINCIPAL INVESTIGATOR(S) AND SUB-INVESTIGATOR(S) PER STUDY SITE WHERE PATIENTS WERE ENROLLED

QSD-002219

Page 166 of 218

|                      |                |                    |          |
|----------------------|----------------|--------------------|----------|
| <b>Product Code:</b> | HOE901/AVE0010 | <b>Study Code:</b> | EFC12405 |
|----------------------|----------------|--------------------|----------|

| Study Center No. | Investigator last name and first name* | Role in the Investigation        | Professional Degree(s) | Institutional Affiliation(s)                                                                                         |
|------------------|----------------------------------------|----------------------------------|------------------------|----------------------------------------------------------------------------------------------------------------------|
| 840573           | Acevedo Lizeth                         | Sub-Investigator/Co-Investigator | CRC                    | Desert Oasis Healthcare Medical Group<br>275 N El Cielo Rd.<br>Suite D-412<br>Palm Springs<br>92262<br>UNITED STATES |
| 840573           | Andresen Teri                          | Sub-Investigator/Co-Investigator | CRC                    | Desert Oasis Healthcare Medical Group<br>275 N El Cielo Rd.<br>Suite D-412<br>Palm Springs<br>92262<br>UNITED STATES |
| 840573           | Chavous Donald                         | Sub-Investigator/Co-Investigator | MD                     | Desert Oasis Healthcare Medical Group<br>275 N El Cielo Rd.<br>Suite D-412<br>Palm Springs<br>92262<br>UNITED STATES |
| 840573           | Figueroa Martin                        | Sub-Investigator/Co-Investigator | CRC                    | Desert Oasis Healthcare Medical Group<br>275 N El Cielo Rd.<br>Suite D-412<br>Palm Springs<br>92262<br>UNITED STATES |

\*CV provided as attachment to this appendix for all principal investigators

*Ensure that the printed copy of this document is the current version available on the Intranet.*

Property of the Sanofi Group - strictly confidential

Version Number: 4.0

28-JUL-2015

# SUPPLEMENTARY DATA

LIST OF PRINCIPAL INVESTIGATOR(S) AND SUB-INVESTIGATOR(S) PER STUDY SITE WHERE PATIENTS WERE ENROLLED

QSD-002219

Page 167 of 218

|                      |                |                    |          |
|----------------------|----------------|--------------------|----------|
| <b>Product Code:</b> | HOE901/AVE0010 | <b>Study Code:</b> | EFC12405 |
|----------------------|----------------|--------------------|----------|

| Study Center No. | Investigator last name and first name* | Role in the Investigation        | Professional Degree(s) | Institutional Affiliation(s)                                                                                         |
|------------------|----------------------------------------|----------------------------------|------------------------|----------------------------------------------------------------------------------------------------------------------|
| 840573           | Flowers Francesca                      | Sub-Investigator/Co-Investigator | MD                     | Desert Oasis Healthcare Medical Group<br>275 N El Cielo Rd.<br>Suite D-412<br>Palm Springs<br>92262<br>UNITED STATES |
| 840573           | Jardula Michael                        | Principal Investigator           | MD                     | Desert Oasis Healthcare Medical Group<br>275 N El Cielo Rd.<br>Suite D-412<br>Palm Springs<br>92262<br>UNITED STATES |
| 840575           | Arif Ahmed                             | Principal Investigator           | MD                     | AA MRC, LLC<br>1201 Flushing Road<br>Flint<br>48504<br>Michigan<br>UNITED STATES                                     |
| 840575           | Syed Mohammed                          | Sub-Investigator/Co-Investigator | MD                     | AA MRC, LLC<br>1201 Flushing Road<br>Flint<br>48504<br>Michigan<br>UNITED STATES                                     |

\*CV provided as attachment to this appendix for all principal investigators

*Ensure that the printed copy of this document is the current version available on the Intranet.*

Property of the Sanofi Group - strictly confidential

Version Number: 4.0

28-JUL-2015

# SUPPLEMENTARY DATA

LIST OF PRINCIPAL INVESTIGATOR(S) AND SUB-INVESTIGATOR(S) PER STUDY SITE WHERE PATIENTS WERE ENROLLED

QSD-002219

Page 168 of 218

|                      |                |                    |          |
|----------------------|----------------|--------------------|----------|
| <b>Product Code:</b> | HOE901/AVE0010 | <b>Study Code:</b> | EFC12405 |
|----------------------|----------------|--------------------|----------|

| Study Center No. | Investigator last name and first name* | Role in the Investigation        | Professional Degree(s) | Institutional Affiliation(s)                                                                                                            |
|------------------|----------------------------------------|----------------------------------|------------------------|-----------------------------------------------------------------------------------------------------------------------------------------|
| 840576           | Bouchonville Matthew                   | Sub-Investigator/Co-Investigator | MD                     | UNM Clinical and Translational Science Center<br>900 Camino de Salud, Suite 2200<br>Albuquerque<br>87131<br>New MEXICO<br>UNITED STATES |
| 840576           | Burge Mark                             | Principal Investigator           | MD                     | UNM Clinical and Translational Science Center<br>900 Camino de Salud, Suite 2200<br>Albuquerque<br>87131<br>New MEXICO<br>UNITED STATES |
| 840576           | Khawaja Hadya                          | Sub-Investigator/Co-Investigator | MS                     | UNM Clinical and Translational Science Center<br>900 Camino de Salud, Suite 2200<br>Albuquerque<br>87131<br>New MEXICO<br>UNITED STATES |
| 840577           | Ross Virginia                          | Sub-Investigator/Co-Investigator | CRC                    | Tucson VAMC<br>3601 S 6th Ave.<br>Endocrinology 111-A<br>Tucson<br>85723<br>Arizona<br>UNITED STATES                                    |

\*CV provided as attachment to this appendix for all principal investigators

*Ensure that the printed copy of this document is the current version available on the Intranet.*

Property of the Sanofi Group - strictly confidential

Version Number: 4.0

28-JUL-2015

# SUPPLEMENTARY DATA

LIST OF PRINCIPAL INVESTIGATOR(S) AND SUB-INVESTIGATOR(S) PER STUDY SITE WHERE PATIENTS WERE ENROLLED

QSD-002219

Page 169 of 218

|                      |                |                    |          |
|----------------------|----------------|--------------------|----------|
| <b>Product Code:</b> | HOE901/AVE0010 | <b>Study Code:</b> | EFC12405 |
|----------------------|----------------|--------------------|----------|

| Study Center No. | Investigator last name and first name* | Role in the Investigation        | Professional Degree(s) | Institutional Affiliation(s)                                                                         |
|------------------|----------------------------------------|----------------------------------|------------------------|------------------------------------------------------------------------------------------------------|
| 840577           | Stump Craig                            | Sub-Investigator/Co-Investigator | PhD,MD                 | Tucson VAMC<br>3601 S 6th Ave.<br>Endocrinology 111-A<br>Tucson<br>85723<br>Arizona<br>UNITED STATES |
| 840577           | Thomson Stephen                        | Principal Investigator           | MD                     | Tucson VAMC<br>3601 S 6th Ave.<br>Endocrinology 111-A<br>Tucson<br>85723<br>Arizona<br>UNITED STATES |
| 840577           | Vincent Tom                            | Sub-Investigator/Co-Investigator | PA-C                   | Tucson VAMC<br>3601 S 6th Ave.<br>Endocrinology 111-A<br>Tucson<br>85723<br>Arizona<br>UNITED STATES |

\*CV provided as attachment to this appendix for all principal investigators

*Ensure that the printed copy of this document is the current version available on the Intranet.*

Property of the Sanofi Group - strictly confidential

Version Number: 4.0

28-JUL-2015

# SUPPLEMENTARY DATA

LIST OF PRINCIPAL INVESTIGATOR(S) AND SUB-INVESTIGATOR(S) PER STUDY SITE WHERE PATIENTS WERE ENROLLED

QSD-002219

Page 170 of 218

|                      |                |                    |          |
|----------------------|----------------|--------------------|----------|
| <b>Product Code:</b> | HOE901/AVE0010 | <b>Study Code:</b> | EFC12405 |
|----------------------|----------------|--------------------|----------|

| Study Center No. | Investigator last name and first name* | Role in the Investigation        | Professional Degree(s) | Institutional Affiliation(s)                                                                                          |
|------------------|----------------------------------------|----------------------------------|------------------------|-----------------------------------------------------------------------------------------------------------------------|
| 840578           | Doriguzzi David                        | Sub-Investigator/Co-Investigator | PA-C                   | First Valley Medical Group<br>44725 N 10th Street West Suite 210<br>Lancaster<br>93534<br>California<br>UNITED STATES |
| 840578           | Kujmanian Leon                         | Sub-Investigator/Co-Investigator | MD                     | First Valley Medical Group<br>44725 N 10th Street West Suite 210<br>Lancaster<br>93534<br>California<br>UNITED STATES |
| 840578           | Pascal Aileen                          | Sub-Investigator/Co-Investigator | BA                     | First Valley Medical Group<br>44725 N 10th Street West Suite 210<br>Lancaster<br>93534<br>California<br>UNITED STATES |
| 840578           | Radillo Jocelyn                        | Sub-Investigator/Co-Investigator | CRC                    | First Valley Medical Group<br>44725 N 10th Street West Suite 210<br>Lancaster<br>93534<br>California<br>UNITED STATES |

\*CV provided as attachment to this appendix for all principal investigators

*Ensure that the printed copy of this document is the current version available on the Intranet.*

Property of the Sanofi Group - strictly confidential

Version Number: 4.0

28-JUL-2015

# SUPPLEMENTARY DATA

LIST OF PRINCIPAL INVESTIGATOR(S) AND SUB-INVESTIGATOR(S) PER STUDY SITE WHERE PATIENTS WERE ENROLLED

QSD-002219

Page 171 of 218

|               |                |             |          |
|---------------|----------------|-------------|----------|
| Product Code: | HOE901/AVE0010 | Study Code: | EFC12405 |
|---------------|----------------|-------------|----------|

| Study Center No. | Investigator last name and first name* | Role in the Investigation        | Professional Degree(s) | Institutional Affiliation(s)                                                                                          |
|------------------|----------------------------------------|----------------------------------|------------------------|-----------------------------------------------------------------------------------------------------------------------|
| 840578           | Sivalingam Kanagaratnam                | Principal Investigator           | MD                     | First Valley Medical Group<br>44725 N 10th Street West Suite 210<br>Lancaster<br>93534<br>California<br>UNITED STATES |
| 840579           | Apking Sarah                           | Sub-Investigator/Co-Investigator | BA                     | Aventiv Clinical Research Inc.<br>99 N Brice Rd.<br>Suite 260<br>Columbus<br>43213<br>Ohio<br>UNITED STATES           |
| 840579           | Arora Samir                            | Principal Investigator           | MD                     | Aventiv Clinical Research Inc.<br>99 N Brice Rd.<br>Suite 260<br>Columbus<br>43213<br>Ohio<br>UNITED STATES           |

\*CV provided as attachment to this appendix for all principal investigators

*Ensure that the printed copy of this document is the current version available on the Intranet.*

Property of the Sanofi Group - strictly confidential

Version Number: 4.0

28-JUL-2015

# SUPPLEMENTARY DATA

LIST OF PRINCIPAL INVESTIGATOR(S) AND SUB-INVESTIGATOR(S) PER STUDY SITE WHERE PATIENTS WERE ENROLLED

QSD-002219

Page 172 of 218

|                      |                |                    |          |
|----------------------|----------------|--------------------|----------|
| <b>Product Code:</b> | HOE901/AVE0010 | <b>Study Code:</b> | EFC12405 |
|----------------------|----------------|--------------------|----------|

| Study Center No. | Investigator last name and first name* | Role in the Investigation        | Professional Degree(s) | Institutional Affiliation(s)                                                                                |
|------------------|----------------------------------------|----------------------------------|------------------------|-------------------------------------------------------------------------------------------------------------|
| 840579           | Basree Mustafa                         | Sub-Investigator/Co-Investigator | BS                     | Aventiv Clinical Research Inc.<br>99 N Brice Rd.<br>Suite 260<br>Columbus<br>43213<br>Ohio<br>UNITED STATES |
| 840579           | Ceo Sarah                              | Sub-Investigator/Co-Investigator | BS                     | Aventiv Clinical Research Inc.<br>99 N Brice Rd.<br>Suite 260<br>Columbus<br>43213<br>Ohio<br>UNITED STATES |
| 840579           | Finley Elizabeth                       | Sub-Investigator/Co-Investigator | RN                     | Aventiv Clinical Research Inc.<br>99 N Brice Rd.<br>Suite 260<br>Columbus<br>43213<br>Ohio<br>UNITED STATES |

\*CV provided as attachment to this appendix for all principal investigators

*Ensure that the printed copy of this document is the current version available on the Intranet.*

Property of the Sanofi Group - strictly confidential

Version Number: 4.0

28-JUL-2015

# SUPPLEMENTARY DATA

LIST OF PRINCIPAL INVESTIGATOR(S) AND SUB-INVESTIGATOR(S) PER STUDY SITE WHERE PATIENTS WERE ENROLLED

QSD-002219

Page 173 of 218

|                      |                |                    |          |
|----------------------|----------------|--------------------|----------|
| <b>Product Code:</b> | HOE901/AVE0010 | <b>Study Code:</b> | EFC12405 |
|----------------------|----------------|--------------------|----------|

| Study Center No. | Investigator last name and first name* | Role in the Investigation        | Professional Degree(s) | Institutional Affiliation(s)                                                                                |
|------------------|----------------------------------------|----------------------------------|------------------------|-------------------------------------------------------------------------------------------------------------|
| 840579           | Garrison Mallory                       | Sub-Investigator/Co-Investigator | MA                     | Aventiv Clinical Research Inc.<br>99 N Brice Rd.<br>Suite 260<br>Columbus<br>43213<br>Ohio<br>UNITED STATES |
| 840579           | Guduri Sridhar                         | Sub-Investigator/Co-Investigator | MD                     | Aventiv Clinical Research Inc.<br>99 N Brice Rd.<br>Suite 260<br>Columbus<br>43213<br>Ohio<br>UNITED STATES |
| 840579           | Nelson Elizabeth                       | Sub-Investigator/Co-Investigator | RN                     | Aventiv Clinical Research Inc.<br>99 N Brice Rd.<br>Suite 260<br>Columbus<br>43213<br>Ohio<br>UNITED STATES |

\*CV provided as attachment to this appendix for all principal investigators

*Ensure that the printed copy of this document is the current version available on the Intranet.*

Property of the Sanofi Group - strictly confidential

Version Number: 4.0

28-JUL-2015



# SUPPLEMENTARY DATA

LIST OF PRINCIPAL INVESTIGATOR(S) AND SUB-INVESTIGATOR(S) PER STUDY SITE WHERE PATIENTS WERE ENROLLED

QSD-002219

Page 174 of 218

|                      |                |                    |          |
|----------------------|----------------|--------------------|----------|
| <b>Product Code:</b> | HOE901/AVE0010 | <b>Study Code:</b> | EFC12405 |
|----------------------|----------------|--------------------|----------|

| Study Center No. | Investigator last name and first name* | Role in the Investigation        | Professional Degree(s) | Institutional Affiliation(s)                                                                                |
|------------------|----------------------------------------|----------------------------------|------------------------|-------------------------------------------------------------------------------------------------------------|
| 840579           | Notestine Jennifer                     | Sub-Investigator/Co-Investigator | BS,CCRP                | Aventiv Clinical Research Inc.<br>99 N Brice Rd.<br>Suite 260<br>Columbus<br>43213<br>Ohio<br>UNITED STATES |
| 840579           | Robbins Gary                           | Sub-Investigator/Co-Investigator | BS                     | Aventiv Clinical Research Inc.<br>99 N Brice Rd.<br>Suite 260<br>Columbus<br>43213<br>Ohio<br>UNITED STATES |
| 840579           | St. John Roy                           | Sub-Investigator/Co-Investigator | MD                     | Aventiv Clinical Research Inc.<br>99 N Brice Rd.<br>Suite 260<br>Columbus<br>43213<br>Ohio<br>UNITED STATES |

\*CV provided as attachment to this appendix for all principal investigators

*Ensure that the printed copy of this document is the current version available on the Intranet.*

Property of the Sanofi Group - strictly confidential

Version Number: 4.0

28-JUL-2015

# SUPPLEMENTARY DATA

LIST OF PRINCIPAL INVESTIGATOR(S) AND SUB-INVESTIGATOR(S) PER STUDY SITE WHERE PATIENTS WERE ENROLLED

QSD-002219

Page 175 of 218

|                      |                |                    |          |
|----------------------|----------------|--------------------|----------|
| <b>Product Code:</b> | HOE901/AVE0010 | <b>Study Code:</b> | EFC12405 |
|----------------------|----------------|--------------------|----------|

| Study Center No. | Investigator last name and first name* | Role in the Investigation        | Professional Degree(s) | Institutional Affiliation(s)                                                                                                 |
|------------------|----------------------------------------|----------------------------------|------------------------|------------------------------------------------------------------------------------------------------------------------------|
| 840579           | Whitson Amy                            | Sub-Investigator/Co-Investigator | MD                     | Aventiv Clinical Research Inc.<br>99 N Brice Rd.<br>Suite 260<br>Columbus<br>43213<br>Ohio<br>UNITED STATES                  |
| 840580           | Sapountzi Paraskevi                    | Sub-Investigator/Co-Investigator | MD                     | Northwest Endo Diabeted Research LLC<br>2101 S. Arlington Heights<br>Arlington Heights<br>60005<br>Illinois<br>UNITED STATES |
| 840580           | So Daniel                              | Sub-Investigator/Co-Investigator | MD                     | Northwest Endo Diabeted Research LLC<br>2101 S. Arlington Heights<br>Arlington Heights<br>60005<br>Illinois<br>UNITED STATES |
| 840580           | Soruco Luis                            | Principal Investigator           | MD                     | Northwest Endo Diabeted Research LLC<br>2101 S. Arlington Heights<br>Arlington Heights<br>60005<br>Illinois<br>UNITED STATES |

\*CV provided as attachment to this appendix for all principal investigators

*Ensure that the printed copy of this document is the current version available on the Intranet.*

Property of the Sanofi Group - strictly confidential

Version Number: 4.0

28-JUL-2015

# SUPPLEMENTARY DATA

LIST OF PRINCIPAL INVESTIGATOR(S) AND SUB-INVESTIGATOR(S) PER STUDY SITE WHERE PATIENTS WERE ENROLLED

QSD-002219

Page 176 of 218

|                      |                |                    |          |
|----------------------|----------------|--------------------|----------|
| <b>Product Code:</b> | HOE901/AVE0010 | <b>Study Code:</b> | EFC12405 |
|----------------------|----------------|--------------------|----------|

| Study Center No. | Investigator last name and first name* | Role in the Investigation        | Professional Degree(s) | Institutional Affiliation(s)                                                                                       |
|------------------|----------------------------------------|----------------------------------|------------------------|--------------------------------------------------------------------------------------------------------------------|
| 840581           | Frias Juan                             | Principal Investigator           | MD                     | National Research Institute<br>2010 Wilshire Blvd Suite 302<br>Los Angeles<br>90057<br>California<br>UNITED STATES |
| 840581           | Hsia Stanley                           | Sub-Investigator/Co-Investigator | MD                     | National Research Institute<br>2010 Wilshire Blvd Suite 302<br>Los Angeles<br>90057<br>California<br>UNITED STATES |
| 840581           | Kelly Sharon                           | Sub-Investigator/Co-Investigator | MSN                    | National Research Institute<br>2010 Wilshire Blvd Suite 302<br>Los Angeles<br>90057<br>California<br>UNITED STATES |
| 840581           | Lewin Andrew                           | Sub-Investigator/Co-Investigator | MD                     | National Research Institute<br>2010 Wilshire Blvd Suite 302<br>Los Angeles<br>90057<br>California<br>UNITED STATES |

\*CV provided as attachment to this appendix for all principal investigators

*Ensure that the printed copy of this document is the current version available on the Intranet.*

Property of the Sanofi Group - strictly confidential

Version Number: 4.0

28-JUL-2015

# SUPPLEMENTARY DATA

LIST OF PRINCIPAL INVESTIGATOR(S) AND SUB-INVESTIGATOR(S) PER STUDY SITE WHERE PATIENTS WERE ENROLLED

QSD-002219

Page 177 of 218

|                      |                |                    |          |
|----------------------|----------------|--------------------|----------|
| <b>Product Code:</b> | HOE901/AVE0010 | <b>Study Code:</b> | EFC12405 |
|----------------------|----------------|--------------------|----------|

| Study Center No. | Investigator last name and first name* | Role in the Investigation        | Professional Degree(s) | Institutional Affiliation(s)                                                                                                                                      |
|------------------|----------------------------------------|----------------------------------|------------------------|-------------------------------------------------------------------------------------------------------------------------------------------------------------------|
| 840581           | Sandoval Rose                          | Sub-Investigator/Co-Investigator | NP                     | National Research Institute<br>2010 Wilshire Blvd Suite 302<br>Los Angeles<br>90057<br>California<br>UNITED STATES                                                |
| 840582           | Rasouli Neda                           | Principal Investigator           | MD                     | University of Colorado<br>12401 E. 17th Avenue<br>Aurora<br>80045<br>Colorado<br>UNITED STATES                                                                    |
| 840582           | Douglas Sara                           | Sub-Investigator/Co-Investigator | PA-C                   | University of Colorado<br>12401 E. 17th Avenue<br>Aurora<br>80045<br>Colorado<br>UNITED STATES                                                                    |
| 840583           | Kim Paul Joon                          | Sub-Investigator/Co-Investigator | MD                     | Queens Hospital Center Department Psychiatry T-3a-19<br>Queens Medical Research Center, LLC<br>8268 164th Street<br>Jamaica<br>11432<br>New York<br>UNITED STATES |

\*CV provided as attachment to this appendix for all principal investigators

*Ensure that the printed copy of this document is the current version available on the Intranet.*

Property of the Sanofi Group - strictly confidential

Version Number: 4.0

28-JUL-2015

# SUPPLEMENTARY DATA

LIST OF PRINCIPAL INVESTIGATOR(S) AND SUB-INVESTIGATOR(S) PER STUDY SITE WHERE PATIENTS WERE ENROLLED

QSD-002219

Page 178 of 218

|               |                |             |          |
|---------------|----------------|-------------|----------|
| Product Code: | HOE901/AVE0010 | Study Code: | EFC12405 |
|---------------|----------------|-------------|----------|

| Study Center No. | Investigator last name and first name* | Role in the Investigation        | Professional Degree(s) | Institutional Affiliation(s)                                                                                                                                      |
|------------------|----------------------------------------|----------------------------------|------------------------|-------------------------------------------------------------------------------------------------------------------------------------------------------------------|
| 840583           | Reich David                            | Sub-Investigator/Co-Investigator | MD                     | Queens Hospital Center Department Psychiatry T-3a-19<br>Queens Medical Research Center, LLC<br>8268 164th Street<br>Jamaica<br>11432<br>New York<br>UNITED STATES |
| 840583           | Sachmechi Isaac                        | Principal Investigator           | MD                     | Queens Hospital Center Department Psychiatry T-3a-19<br>Queens Medical Research Center, LLC<br>8268 164th Street<br>Jamaica<br>11432<br>New York<br>UNITED STATES |
| 840584           | Batrus Jennifer                        | Sub-Investigator/Co-Investigator | PA-C                   | Tipton Medical And Diagnostic Center<br>4371 East Pleasant Valley Boulevard<br>Tipton<br>16684<br>Pennsylvania<br>UNITED STATES                                   |

\*CV provided as attachment to this appendix for all principal investigators

*Ensure that the printed copy of this document is the current version available on the Intranet.*

Property of the Sanofi Group - strictly confidential

Version Number: 4.0

28-JUL-2015

# SUPPLEMENTARY DATA

LIST OF PRINCIPAL INVESTIGATOR(S) AND SUB-INVESTIGATOR(S) PER STUDY SITE WHERE PATIENTS WERE ENROLLED

QSD-002219

Page 179 of 218

|                      |                |                    |          |
|----------------------|----------------|--------------------|----------|
| <b>Product Code:</b> | HOE901/AVE0010 | <b>Study Code:</b> | EFC12405 |
|----------------------|----------------|--------------------|----------|

| Study Center No. | Investigator last name and first name* | Role in the Investigation        | Professional Degree(s) | Institutional Affiliation(s)                                                                                                    |
|------------------|----------------------------------------|----------------------------------|------------------------|---------------------------------------------------------------------------------------------------------------------------------|
| 840584           | Confer Melissa                         | Sub-Investigator/Co-Investigator | CRC                    | Tipton Medical And Diagnostic Center<br>4371 East Pleasant Valley Boulevard<br>Tipton<br>16684<br>Pennsylvania<br>UNITED STATES |
| 840584           | Conrad Amanda                          | Sub-Investigator/Co-Investigator | CMA,CRC                | Tipton Medical And Diagnostic Center<br>4371 East Pleasant Valley Boulevard<br>Tipton<br>16684<br>Pennsylvania<br>UNITED STATES |
| 840584           | Edevane Shari                          | Sub-Investigator/Co-Investigator | RN                     | Tipton Medical And Diagnostic Center<br>4371 East Pleasant Valley Boulevard<br>Tipton<br>16684<br>Pennsylvania<br>UNITED STATES |
| 840584           | Levinson Lawrence                      | Principal Investigator           | MD                     | Tipton Medical And Diagnostic Center<br>4371 East Pleasant Valley Boulevard<br>Tipton<br>16684<br>Pennsylvania<br>UNITED STATES |

\*CV provided as attachment to this appendix for all principal investigators

*Ensure that the printed copy of this document is the current version available on the Intranet.*

Property of the Sanofi Group - strictly confidential

Version Number: 4.0

28-JUL-2015

# SUPPLEMENTARY DATA

LIST OF PRINCIPAL INVESTIGATOR(S) AND SUB-INVESTIGATOR(S) PER STUDY SITE WHERE PATIENTS WERE ENROLLED

QSD-002219

Page 180 of 218

|                      |                |                    |          |
|----------------------|----------------|--------------------|----------|
| <b>Product Code:</b> | HOE901/AVE0010 | <b>Study Code:</b> | EFC12405 |
|----------------------|----------------|--------------------|----------|

| Study Center No. | Investigator last name and first name* | Role in the Investigation        | Professional Degree(s) | Institutional Affiliation(s)                                                                                                     |
|------------------|----------------------------------------|----------------------------------|------------------------|----------------------------------------------------------------------------------------------------------------------------------|
| 840584           | Reinhardt John                         | Sub-Investigator/Co-Investigator | DO                     | Tipton Medical And Diagnostic Center<br>4371 East Pleasant Valley Boulevard<br>Tipton<br>16684<br>Pennsylvania<br>UNITED STATES  |
| 840584           | Shawley Sarah                          | Sub-Investigator/Co-Investigator | LPN, CRC               | Tipton Medical And Diagnostic Center<br>4371 East Pleasant Valley Boulevard<br>Tipton<br>16684<br>Pennsylvania<br>UNITED STATES  |
| 840585           | Dela Llana Alexander                   | Sub-Investigator/Co-Investigator | MD                     | MediSphere Medical Research Center, LLC<br>1401 Professional Blvd., Suite 100<br>Evansville<br>47714<br>Indiana<br>UNITED STATES |
| 840585           | Hoebeke Roberta                        | Sub-Investigator/Co-Investigator | RN, PhD                | MediSphere Medical Research Center, LLC<br>1401 Professional Blvd., Suite 100<br>Evansville<br>47714<br>Indiana<br>UNITED STATES |

\*CV provided as attachment to this appendix for all principal investigators

*Ensure that the printed copy of this document is the current version available on the Intranet.*

Property of the Sanofi Group - strictly confidential

Version Number: 4.0

28-JUL-2015

# SUPPLEMENTARY DATA

LIST OF PRINCIPAL INVESTIGATOR(S) AND SUB-INVESTIGATOR(S) PER STUDY SITE WHERE PATIENTS WERE ENROLLED

QSD-002219

Page 181 of 218

|                      |                |                    |          |
|----------------------|----------------|--------------------|----------|
| <b>Product Code:</b> | HOE901/AVE0010 | <b>Study Code:</b> | EFC12405 |
|----------------------|----------------|--------------------|----------|

| Study Center No. | Investigator last name and first name* | Role in the Investigation        | Professional Degree(s) | Institutional Affiliation(s)                                                                                                     |
|------------------|----------------------------------------|----------------------------------|------------------------|----------------------------------------------------------------------------------------------------------------------------------|
| 840585           | Reyes Hubert                           | Principal Investigator           | MD                     | MediSphere Medical Research Center, LLC<br>1401 Professional Blvd., Suite 100<br>Evansville<br>47714<br>Indiana<br>UNITED STATES |
| 840585           | Rutherford Mary                        | Sub-Investigator/Co-Investigator | FNP-C                  | MediSphere Medical Research Center, LLC<br>1401 Professional Blvd., Suite 100<br>Evansville<br>47714<br>Indiana<br>UNITED STATES |
| 840585           | Sebastian Mike Gerald                  | Sub-Investigator/Co-Investigator | MD                     | MediSphere Medical Research Center, LLC<br>1401 Professional Blvd., Suite 100<br>Evansville<br>47714<br>Indiana<br>UNITED STATES |
| 840586           | Creagan Susan                          | Sub-Investigator/Co-Investigator | MD                     | Dallas VA Medical Center<br>4500 S Lancaster Rd.<br>Dallas<br>75216<br>Texas<br>UNITED STATES                                    |

\*CV provided as attachment to this appendix for all principal investigators

*Ensure that the printed copy of this document is the current version available on the Intranet.*

Property of the Sanofi Group - strictly confidential

Version Number: 4.0

28-JUL-2015



# SUPPLEMENTARY DATA

LIST OF PRINCIPAL INVESTIGATOR(S) AND SUB-INVESTIGATOR(S) PER STUDY SITE WHERE PATIENTS WERE ENROLLED

QSD-002219

Page 182 of 218

|                      |                |                    |          |
|----------------------|----------------|--------------------|----------|
| <b>Product Code:</b> | HOE901/AVE0010 | <b>Study Code:</b> | EFC12405 |
|----------------------|----------------|--------------------|----------|

| Study Center No. | Investigator last name and first name* | Role in the Investigation        | Professional Degree(s) | Institutional Affiliation(s)                                                                                               |
|------------------|----------------------------------------|----------------------------------|------------------------|----------------------------------------------------------------------------------------------------------------------------|
| 840586           | Dunn Fredrick                          | Principal Investigator           | MD                     | Dallas VA Medical Center<br>4500 S Lancaster Rd.<br>Dallas<br>75216<br>Texas<br>UNITED STATES                              |
| 840586           | Guerra Patricia                        | Sub-Investigator/Co-Investigator | PA-C                   | Dallas VA Medical Center<br>4500 S Lancaster Rd.<br>Dallas<br>75216<br>Texas<br>UNITED STATES                              |
| 840586           | Welch Evelyn                           | Sub-Investigator/Co-Investigator | FNP-BC                 | Dallas VA Medical Center<br>4500 S Lancaster Rd.<br>Dallas<br>75216<br>Texas<br>UNITED STATES                              |
| 840588           | Coughenour Tiffany                     | Sub-Investigator/Co-Investigator | Physician Assistant    | Rocky Mountain Diabetes and Osteoporosis Center<br>3910 Washington Pkwy.<br>Idaho Falls<br>83404<br>Idaho<br>UNITED STATES |

\*CV provided as attachment to this appendix for all principal investigators

*Ensure that the printed copy of this document is the current version available on the Intranet.*

Property of the Sanofi Group - strictly confidential

Version Number: 4.0

28-JUL-2015

# SUPPLEMENTARY DATA

LIST OF PRINCIPAL INVESTIGATOR(S) AND SUB-INVESTIGATOR(S) PER STUDY SITE WHERE PATIENTS WERE ENROLLED

QSD-002219

Page 183 of 218

|                      |                |                    |          |
|----------------------|----------------|--------------------|----------|
| <b>Product Code:</b> | HOE901/AVE0010 | <b>Study Code:</b> | EFC12405 |
|----------------------|----------------|--------------------|----------|

| Study Center No. | Investigator last name and first name* | Role in the Investigation        | Professional Degree(s) | Institutional Affiliation(s)                                                                                               |
|------------------|----------------------------------------|----------------------------------|------------------------|----------------------------------------------------------------------------------------------------------------------------|
| 840588           | Liljenquist David                      | Sub-Investigator/Co-Investigator | MD                     | Rocky Mountain Diabetes and Osteoporosis Center<br>3910 Washington Pkwy.<br>Idaho Falls<br>83404<br>Idaho<br>UNITED STATES |
| 840588           | Vance Carl                             | Principal Investigator           | MD                     | Rocky Mountain Diabetes and Osteoporosis Center<br>3910 Washington Pkwy.<br>Idaho Falls<br>83404<br>Idaho<br>UNITED STATES |
| 840588           | Williams Jonathan                      | Sub-Investigator/Co-Investigator | FNP-C                  | Rocky Mountain Diabetes and Osteoporosis Center<br>3910 Washington Pkwy.<br>Idaho Falls<br>83404<br>Idaho<br>UNITED STATES |

\*CV provided as attachment to this appendix for all principal investigators

*Ensure that the printed copy of this document is the current version available on the Intranet.*

Property of the Sanofi Group - strictly confidential

Version Number: 4.0

28-JUL-2015

# SUPPLEMENTARY DATA

LIST OF PRINCIPAL INVESTIGATOR(S) AND SUB-INVESTIGATOR(S) PER STUDY SITE WHERE PATIENTS WERE ENROLLED

QSD-002219

Page 184 of 218

|                      |                |                    |          |
|----------------------|----------------|--------------------|----------|
| <b>Product Code:</b> | HOE901/AVE0010 | <b>Study Code:</b> | EFC12405 |
|----------------------|----------------|--------------------|----------|

| Study Center No. | Investigator last name and first name* | Role in the Investigation        | Professional Degree(s) | Institutional Affiliation(s)                                                                                          |
|------------------|----------------------------------------|----------------------------------|------------------------|-----------------------------------------------------------------------------------------------------------------------|
| 840590           | Rhudy Jackson                          | Principal Investigator           | MD                     | Optimum Clinical Research, Inc<br>82 South 1100 East<br>Suite 402<br>Salt Lake City<br>84102<br>Utah<br>UNITED STATES |
| 840590           | Zubair Imran                           | Sub-Investigator/Co-Investigator | MD                     | Optimum Clinical Research, Inc<br>82 South 1100 East<br>Suite 402<br>Salt Lake City<br>84102<br>Utah<br>UNITED STATES |
| 840591           | Adams Michael                          | Principal Investigator           | MD                     | Radiant Research, Inc.<br>5251 South Green Street<br>Suite 300<br>Murray<br>84123<br>Utah<br>UNITED STATES            |

\*CV provided as attachment to this appendix for all principal investigators

*Ensure that the printed copy of this document is the current version available on the Intranet.*

Property of the Sanofi Group - strictly confidential

Version Number: 4.0

28-JUL-2015

# SUPPLEMENTARY DATA

LIST OF PRINCIPAL INVESTIGATOR(S) AND SUB-INVESTIGATOR(S) PER STUDY SITE WHERE PATIENTS WERE ENROLLED

QSD-002219

Page 185 of 218

|                      |                |                    |          |
|----------------------|----------------|--------------------|----------|
| <b>Product Code:</b> | HOE901/AVE0010 | <b>Study Code:</b> | EFC12405 |
|----------------------|----------------|--------------------|----------|

| Study Center No. | Investigator last name and first name* | Role in the Investigation        | Professional Degree(s) | Institutional Affiliation(s)                                                                                           |
|------------------|----------------------------------------|----------------------------------|------------------------|------------------------------------------------------------------------------------------------------------------------|
| 840591           | Johnston Mark                          | Sub-Investigator/Co-Investigator | MD                     | Radiant Research, Inc.<br>5251 South Green Street<br>Suite 300<br>Murray<br>84123<br>Utah<br>UNITED STATES             |
| 840592           | Farrington Cecil Murray                | Sub-Investigator/Co-Investigator | MD                     | PMG Research of Salisbury<br>401 Mocksville Ave.<br>Suite 200<br>Salisbury<br>28144<br>North Carolina<br>UNITED STATES |
| 840592           | Fox Alana                              | Sub-Investigator/Co-Investigator | CRC                    | PMG Research of Salisbury<br>401 Mocksville Ave.<br>Suite 200<br>Salisbury<br>28144<br>North Carolina<br>UNITED STATES |

\*CV provided as attachment to this appendix for all principal investigators

*Ensure that the printed copy of this document is the current version available on the Intranet.*

Property of the Sanofi Group - strictly confidential

Version Number: 4.0

28-JUL-2015

# SUPPLEMENTARY DATA

LIST OF PRINCIPAL INVESTIGATOR(S) AND SUB-INVESTIGATOR(S) PER STUDY SITE WHERE PATIENTS WERE ENROLLED

QSD-002219

Page 186 of 218

|                      |                |                    |          |
|----------------------|----------------|--------------------|----------|
| <b>Product Code:</b> | HOE901/AVE0010 | <b>Study Code:</b> | EFC12405 |
|----------------------|----------------|--------------------|----------|

| Study Center No. | Investigator last name and first name* | Role in the Investigation        | Professional Degree(s) | Institutional Affiliation(s)                                                                                           |
|------------------|----------------------------------------|----------------------------------|------------------------|------------------------------------------------------------------------------------------------------------------------|
| 840592           | Haywood Ashley                         | Sub-Investigator/Co-Investigator | CRC                    | PMG Research of Salisbury<br>401 Mocksville Ave.<br>Suite 200<br>Salisbury<br>28144<br>North Carolina<br>UNITED STATES |
| 840592           | McNeill Robert                         | Principal Investigator           | MD                     | PMG Research of Salisbury<br>401 Mocksville Ave.<br>Suite 200<br>Salisbury<br>28144<br>North Carolina<br>UNITED STATES |
| 840592           | Pittman Amy                            | Sub-Investigator/Co-Investigator | CRC                    | PMG Research of Salisbury<br>401 Mocksville Ave.<br>Suite 200<br>Salisbury<br>28144<br>North Carolina<br>UNITED STATES |

\*CV provided as attachment to this appendix for all principal investigators

*Ensure that the printed copy of this document is the current version available on the Intranet.*

Property of the Sanofi Group - strictly confidential

Version Number: 4.0

28-JUL-2015

# SUPPLEMENTARY DATA

LIST OF PRINCIPAL INVESTIGATOR(S) AND SUB-INVESTIGATOR(S) PER STUDY SITE WHERE PATIENTS WERE ENROLLED

QSD-002219

Page 187 of 218

|                      |                |                    |          |
|----------------------|----------------|--------------------|----------|
| <b>Product Code:</b> | HOE901/AVE0010 | <b>Study Code:</b> | EFC12405 |
|----------------------|----------------|--------------------|----------|

| Study Center No. | Investigator last name and first name* | Role in the Investigation        | Professional Degree(s) | Institutional Affiliation(s)                                                                           |
|------------------|----------------------------------------|----------------------------------|------------------------|--------------------------------------------------------------------------------------------------------|
| 840593           | Jones Jennifer                         | Sub-Investigator/Co-Investigator | ARNP                   | Rockwood Clinical Research Center<br>400 E 5th Ave.<br>Spokane<br>99220<br>Washington<br>UNITED STATES |
| 840593           | Willis Stephen Isaac                   | Sub-Investigator/Co-Investigator | PA-C                   | Rockwood Clinical Research Center<br>400 E 5th Ave.<br>Spokane<br>99220<br>Washington<br>UNITED STATES |
| 840593           | Wukelic Michael Steven                 | Sub-Investigator/Co-Investigator | MD                     | Rockwood Clinical Research Center<br>400 E 5th Ave.<br>Spokane<br>99220<br>Washington<br>UNITED STATES |
| 840593           | Wysham Carol                           | Principal Investigator           | MD                     | Rockwood Clinical Research Center<br>400 E 5th Ave.<br>Spokane<br>99220<br>Washington<br>UNITED STATES |

\*CV provided as attachment to this appendix for all principal investigators

*Ensure that the printed copy of this document is the current version available on the Intranet.*

Property of the Sanofi Group - strictly confidential

Version Number: 4.0

28-JUL-2015

# SUPPLEMENTARY DATA

LIST OF PRINCIPAL INVESTIGATOR(S) AND SUB-INVESTIGATOR(S) PER STUDY SITE WHERE PATIENTS WERE ENROLLED

QSD-002219

Page 188 of 218

|                      |                |                    |          |
|----------------------|----------------|--------------------|----------|
| <b>Product Code:</b> | HOE901/AVE0010 | <b>Study Code:</b> | EFC12405 |
|----------------------|----------------|--------------------|----------|

| Study Center No. | Investigator last name and first name* | Role in the Investigation        | Professional Degree(s) | Institutional Affiliation(s)                                                                                            |
|------------------|----------------------------------------|----------------------------------|------------------------|-------------------------------------------------------------------------------------------------------------------------|
| 840594           | Oyedokun Festus                        | Sub-Investigator/Co-Investigator | MD                     | Grady Memorial Hospital (Grady Diabetes Clinic),<br>80 Jesse Hill Jr. Drive SE,<br>Atlanta GA<br>30303<br>UNITED STATES |
| 840594           | Pasquel Francisco                      | Sub-Investigator/Co-Investigator | MD                     | Grady Memorial Hospital (Grady Diabetes Clinic),<br>80 Jesse Hill Jr. Drive SE,<br>Atlanta GA<br>30303<br>UNITED STATES |
| 840594           | Robalino Gonzalo                       | Sub-Investigator/Co-Investigator | MD                     | Grady Memorial Hospital (Grady Diabetes Clinic),<br>80 Jesse Hill Jr. Drive SE,<br>Atlanta GA<br>30303<br>UNITED STATES |
| 840594           | Smiley Dawn                            | Sub-Investigator/Co-Investigator | MD                     | Emory University<br>49 Jesse Hill, Jr. Dr.<br>Atlanta<br>30303<br>Georgia<br>UNITED STATES                              |
| 840594           | Umpierrez Guillermo                    | Principal Investigator           | MD                     | Grady Memorial Hospital (Grady Diabetes Clinic),<br>80 Jesse Hill Jr. Drive SE,<br>Atlanta GA<br>30303<br>UNITED STATES |

\*CV provided as attachment to this appendix for all principal investigators

*Ensure that the printed copy of this document is the current version available on the Intranet.*

Property of the Sanofi Group - strictly confidential

Version Number: 4.0

28-JUL-2015

# SUPPLEMENTARY DATA

LIST OF PRINCIPAL INVESTIGATOR(S) AND SUB-INVESTIGATOR(S) PER STUDY SITE WHERE PATIENTS WERE ENROLLED

QSD-002219

Page 189 of 218

|                      |                |                    |          |
|----------------------|----------------|--------------------|----------|
| <b>Product Code:</b> | HOE901/AVE0010 | <b>Study Code:</b> | EFC12405 |
|----------------------|----------------|--------------------|----------|

| Study Center No. | Investigator last name and first name* | Role in the Investigation        | Professional Degree(s) | Institutional Affiliation(s)                                                                 |
|------------------|----------------------------------------|----------------------------------|------------------------|----------------------------------------------------------------------------------------------|
| 840595           | Brown Summer                           | Sub-Investigator/Co-Investigator | RN                     | Maine Research Associates<br>76 High Street, Suite 204<br>Lewiston<br>04240<br>UNITED STATES |
| 840595           | Dunham Victoria                        | Sub-Investigator/Co-Investigator | BS                     | Maine Research Associates<br>76 High Street, Suite 204<br>Lewiston<br>04240<br>UNITED STATES |
| 840595           | Freeman Deborah                        | Sub-Investigator/Co-Investigator | BS,RN                  | Maine Research Associates<br>76 High Street, Suite 204<br>Lewiston<br>04240<br>UNITED STATES |
| 840595           | Heath Melissa                          | Sub-Investigator/Co-Investigator | RN                     | Maine Research Associates<br>76 High Street, Suite 204<br>Lewiston<br>04240<br>UNITED STATES |
| 840595           | Peralta Maylene Claire                 | Sub-Investigator/Co-Investigator | MD                     | Maine Research Associates<br>76 High Street, Suite 204<br>Lewiston<br>04240<br>UNITED STATES |

\*CV provided as attachment to this appendix for all principal investigators

*Ensure that the printed copy of this document is the current version available on the Intranet.*

Property of the Sanofi Group - strictly confidential

Version Number: 4.0

28-JUL-2015



# SUPPLEMENTARY DATA

LIST OF PRINCIPAL INVESTIGATOR(S) AND SUB-INVESTIGATOR(S) PER STUDY SITE WHERE PATIENTS WERE ENROLLED

QSD-002219

Page 190 of 218

|                      |                |                    |          |
|----------------------|----------------|--------------------|----------|
| <b>Product Code:</b> | HOE901/AVE0010 | <b>Study Code:</b> | EFC12405 |
|----------------------|----------------|--------------------|----------|

| Study Center No. | Investigator last name and first name* | Role in the Investigation        | Professional Degree(s) | Institutional Affiliation(s)                                                                 |
|------------------|----------------------------------------|----------------------------------|------------------------|----------------------------------------------------------------------------------------------|
| 840595           | Stenberg Janet                         | Sub-Investigator/Co-Investigator | APRN-CNP               | Maine Research Associates<br>76 High Street, Suite 204<br>Lewiston<br>04240<br>UNITED STATES |
| 840595           | Trask Laura                            | Sub-Investigator/Co-Investigator | MD                     | Maine Research Associates<br>76 High Street, Suite 204<br>Lewiston<br>04240<br>UNITED STATES |
| 840595           | Weiss Robert                           | Principal Investigator           | MD                     | Maine Research Associates<br>76 High Street, Suite 204<br>Lewiston<br>04240<br>UNITED STATES |
| 840597           | Crump Kenneth                          | Principal Investigator           | MD                     | Aspen Clinical Research<br>1215 South 1680 West<br>Orem<br>84058<br>UNITED STATES            |
| 840597           | Harris Michael                         | Sub-Investigator/Co-Investigator | DO                     | Aspen Clinical Research<br>1215 South 1680 West<br>Orem<br>84058<br>UNITED STATES            |

\*CV provided as attachment to this appendix for all principal investigators

*Ensure that the printed copy of this document is the current version available on the Intranet.*

Property of the Sanofi Group - strictly confidential

Version Number: 4.0

28-JUL-2015

# SUPPLEMENTARY DATA

LIST OF PRINCIPAL INVESTIGATOR(S) AND SUB-INVESTIGATOR(S) PER STUDY SITE WHERE PATIENTS WERE ENROLLED

QSD-002219

Page 191 of 218

|                      |                |                    |          |
|----------------------|----------------|--------------------|----------|
| <b>Product Code:</b> | HOE901/AVE0010 | <b>Study Code:</b> | EFC12405 |
|----------------------|----------------|--------------------|----------|

| Study Center No. | Investigator last name and first name* | Role in the Investigation        | Professional Degree(s) | Institutional Affiliation(s)                                                                                        |
|------------------|----------------------------------------|----------------------------------|------------------------|---------------------------------------------------------------------------------------------------------------------|
| 840597           | Maturlo Susan                          | Sub-Investigator/Co-Investigator | MD                     | Aspen Clinical Research<br>1215 South 1680 West<br>Orem<br>84058<br>UNITED STATES                                   |
| 840597           | Roach Christine                        | Sub-Investigator/Co-Investigator | PA-C                   | Aspen Clinical Research<br>1215 South 1680 West<br>Orem<br>84058<br>UNITED STATES                                   |
| 840598           | Bonazzi Amanda                         | Sub-Investigator/Co-Investigator | RN                     | Texas Diabetes & Endocrinology<br>170 Deep Wood Drive<br>Suite 104<br>Round Rock<br>78681<br>Texas<br>UNITED STATES |
| 840598           | <a href="#">Ozer Kerem</a>             | Principal Investigator           | MD                     | Texas Diabetes & Endocrinology<br>170 Deep Wood Drive<br>Suite 104<br>Round Rock<br>78681<br>Texas<br>UNITED STATES |

\*CV provided as attachment to this appendix for all principal investigators

*Ensure that the printed copy of this document is the current version available on the Intranet.*

Property of the Sanofi Group - strictly confidential

Version Number: 4.0

28-JUL-2015

# SUPPLEMENTARY DATA

LIST OF PRINCIPAL INVESTIGATOR(S) AND SUB-INVESTIGATOR(S) PER STUDY SITE WHERE PATIENTS WERE ENROLLED

QSD-002219

Page 192 of 218

|                      |                |                    |          |
|----------------------|----------------|--------------------|----------|
| <b>Product Code:</b> | HOE901/AVE0010 | <b>Study Code:</b> | EFC12405 |
|----------------------|----------------|--------------------|----------|

| Study Center No. | Investigator last name and first name* | Role in the Investigation        | Professional Degree(s) | Institutional Affiliation(s)                                                                                        |
|------------------|----------------------------------------|----------------------------------|------------------------|---------------------------------------------------------------------------------------------------------------------|
| 840598           | Shaw Stephanie                         | Sub-Investigator/Co-Investigator | MD                     | Texas Diabetes & Endocrinology<br>170 Deep Wood Drive<br>Suite 104<br>Round Rock<br>78681<br>Texas<br>UNITED STATES |
| 840598           | Shirley Jeffrey                        | Sub-Investigator/Co-Investigator | MSN,RN                 | Texas Diabetes & Endocrinology<br>170 Deep Wood Drive<br>Suite 104<br>Round Rock<br>78681<br>Texas<br>UNITED STATES |
| 840598           | Singh Kamalpreet                       | Sub-Investigator/Co-Investigator | MD                     | Texas Diabetes & Endocrinology<br>170 Deep Wood Drive<br>Suite 104<br>Round Rock<br>78681<br>Texas<br>UNITED STATES |

\*CV provided as attachment to this appendix for all principal investigators

*Ensure that the printed copy of this document is the current version available on the Intranet.*

Property of the Sanofi Group - strictly confidential

Version Number: 4.0

28-JUL-2015

# SUPPLEMENTARY DATA

LIST OF PRINCIPAL INVESTIGATOR(S) AND SUB-INVESTIGATOR(S) PER STUDY SITE WHERE PATIENTS WERE ENROLLED

QSD-002219

Page 193 of 218

|                      |                |                    |          |
|----------------------|----------------|--------------------|----------|
| <b>Product Code:</b> | HOE901/AVE0010 | <b>Study Code:</b> | EFC12405 |
|----------------------|----------------|--------------------|----------|

| Study Center No. | Investigator last name and first name* | Role in the Investigation        | Professional Degree(s) | Institutional Affiliation(s)                                                                                        |
|------------------|----------------------------------------|----------------------------------|------------------------|---------------------------------------------------------------------------------------------------------------------|
| 840598           | Ulrich Michelle                        | Sub-Investigator/Co-Investigator | CRC                    | Texas Diabetes & Endocrinology<br>170 Deep Wood Drive<br>Suite 104<br>Round Rock<br>78681<br>Texas<br>UNITED STATES |
| 840599           | Bowers Rachel Cora                     | Sub-Investigator/Co-Investigator | PA-C                   | Palm Research Center<br>9280 W. Sunset Road<br>Suite 306<br>Las Vegas<br>89148<br>Nevada<br>UNITED STATES           |
| 840599           | Klugh Serena Ann                       | Sub-Investigator/Co-Investigator | MD                     | Palm Research Center<br>9280 W. Sunset Road<br>Suite 306<br>Las Vegas<br>89148<br>Nevada<br>UNITED STATES           |

\*CV provided as attachment to this appendix for all principal investigators

*Ensure that the printed copy of this document is the current version available on the Intranet.*

Property of the Sanofi Group - strictly confidential

Version Number: 4.0

28-JUL-2015

# SUPPLEMENTARY DATA

LIST OF PRINCIPAL INVESTIGATOR(S) AND SUB-INVESTIGATOR(S) PER STUDY SITE WHERE PATIENTS WERE ENROLLED

QSD-002219

Page 194 of 218

|                      |                |                    |          |
|----------------------|----------------|--------------------|----------|
| <b>Product Code:</b> | HOE901/AVE0010 | <b>Study Code:</b> | EFC12405 |
|----------------------|----------------|--------------------|----------|

| Study Center No. | Investigator last name and first name* | Role in the Investigation        | Professional Degree(s) | Institutional Affiliation(s)                                                                                                                       |
|------------------|----------------------------------------|----------------------------------|------------------------|----------------------------------------------------------------------------------------------------------------------------------------------------|
| 840599           | Nakhle Samer                           | Principal Investigator           | MD                     | Palm Research Center<br>9280 W. Sunset Road<br>Suite 306<br>Las Vegas<br>89148<br>Nevada<br>UNITED STATES                                          |
| 840599           | Palal Betsy                            | Sub-Investigator/Co-Investigator | MD                     | Palm Research Center<br>9280 W. Sunset Road<br>Suite 306<br>Las Vegas<br>89148<br>Nevada<br>UNITED STATES                                          |
| 840600           | Amirjalali Violet                      | Sub-Investigator/Co-Investigator | PA-C                   | Desert Endocrinology Clinical Research Center,<br>2415 West Horizon Ridge Parkway,<br>Suite 100,<br>Henderson,<br>Nevada<br>89052<br>UNITED STATES |

\*CV provided as attachment to this appendix for all principal investigators

*Ensure that the printed copy of this document is the current version available on the Intranet.*

Property of the Sanofi Group - strictly confidential

Version Number: 4.0

28-JUL-2015

# SUPPLEMENTARY DATA

LIST OF PRINCIPAL INVESTIGATOR(S) AND SUB-INVESTIGATOR(S) PER STUDY SITE WHERE PATIENTS WERE ENROLLED

QSD-002219

Page 195 of 218

|                      |                |                    |          |
|----------------------|----------------|--------------------|----------|
| <b>Product Code:</b> | HOE901/AVE0010 | <b>Study Code:</b> | EFC12405 |
|----------------------|----------------|--------------------|----------|

| Study Center No. | Investigator last name and first name* | Role in the Investigation        | Professional Degree(s) | Institutional Affiliation(s)                                                                                                                       |
|------------------|----------------------------------------|----------------------------------|------------------------|----------------------------------------------------------------------------------------------------------------------------------------------------|
| 840600           | Litchfield William                     | Principal Investigator           | MD                     | Desert Endocrinology Clinical Research Center,<br>2415 West Horizon Ridge Parkway,<br>Suite 100,<br>Henderson,<br>Nevada<br>89052<br>UNITED STATES |
| 840600           | Walker Tomas                           | Sub-Investigator/Co-Investigator | DNP                    | Desert Endocrinology Clinical Research Center,<br>2415 West Horizon Ridge Parkway,<br>Suite 100,<br>Henderson,<br>Nevada<br>89052<br>UNITED STATES |
| 840601           | Camp Shana                             | Sub-Investigator/Co-Investigator | MA, CCRC               | Protenium Clinical Research LLC,<br>221 W. Colorado Blvd,<br>Suite 943,<br>Dallas TX<br>75208<br>UNITED STATES                                     |
| 840601           | Fordan Steve                           | Principal Investigator           | BS,MD                  | Protenium Clinical Research LLC,<br>221 W. Colorado Blvd,<br>Suite 943,<br>Dallas TX<br>75208<br>UNITED STATES                                     |

\*CV provided as attachment to this appendix for all principal investigators

*Ensure that the printed copy of this document is the current version available on the Intranet.*

Property of the Sanofi Group - strictly confidential

Version Number: 4.0

28-JUL-2015

# SUPPLEMENTARY DATA

LIST OF PRINCIPAL INVESTIGATOR(S) AND SUB-INVESTIGATOR(S) PER STUDY SITE WHERE PATIENTS WERE ENROLLED

QSD-002219

Page 196 of 218

|                      |                |                    |          |
|----------------------|----------------|--------------------|----------|
| <b>Product Code:</b> | HOE901/AVE0010 | <b>Study Code:</b> | EFC12405 |
|----------------------|----------------|--------------------|----------|

| Study Center No. | Investigator last name and first name* | Role in the Investigation        | Professional Degree(s) | Institutional Affiliation(s)                                                                                   |
|------------------|----------------------------------------|----------------------------------|------------------------|----------------------------------------------------------------------------------------------------------------|
| 840601           | Joslin Brenda                          | Sub-Investigator/Co-Investigator | CRC                    | Protenium Clinical Research LLC,<br>221 W. Colorado Blvd,<br>Suite 943,<br>Dallas TX<br>75208<br>UNITED STATES |
| 840601           | Robbins D'Lorah                        | Sub-Investigator/Co-Investigator | PA-C                   | Protenium Clinical Research LLC,<br>221 W. Colorado Blvd,<br>Suite 943,<br>Dallas TX<br>75208<br>UNITED STATES |
| 840602           | Albright David                         | Sub-Investigator/Co-Investigator | MD                     | Magnolia Research Group Inc<br>2203 South East Third Avenue<br>Ocala<br>34471<br>Florida<br>UNITED STATES      |
| 840602           | Popeil Larry                           | Principal Investigator           | MD                     | Magnolia Research Group Inc<br>2203 South East Third Avenue<br>Ocala<br>34471<br>Florida<br>UNITED STATES      |

\*CV provided as attachment to this appendix for all principal investigators

*Ensure that the printed copy of this document is the current version available on the Intranet.*

Property of the Sanofi Group - strictly confidential

Version Number: 4.0

28-JUL-2015

# SUPPLEMENTARY DATA

LIST OF PRINCIPAL INVESTIGATOR(S) AND SUB-INVESTIGATOR(S) PER STUDY SITE WHERE PATIENTS WERE ENROLLED

QSD-002219

Page 197 of 218

|                      |                |                    |          |
|----------------------|----------------|--------------------|----------|
| <b>Product Code:</b> | HOE901/AVE0010 | <b>Study Code:</b> | EFC12405 |
|----------------------|----------------|--------------------|----------|

| Study Center No. | Investigator last name and first name* | Role in the Investigation        | Professional Degree(s) | Institutional Affiliation(s)                                                                                                      |
|------------------|----------------------------------------|----------------------------------|------------------------|-----------------------------------------------------------------------------------------------------------------------------------|
| 840604           | Dar Moahad                             | Sub-Investigator/Co-Investigator | MD                     | East Carolina University- Diabetes Research Center, BSOM, Lakeside Annex #4, 600 Moye Blvd, Greenville, NC 27834<br>UNITED STATES |
| 840604           | Drake III Almond                       | Sub-Investigator/Co-Investigator | MD                     | East Carolina University- Diabetes Research Center, BSOM, Lakeside Annex #4, 600 Moye Blvd, Greenville, NC 27834<br>UNITED STATES |
| 840604           | Tanenberg Robert                       | Principal Investigator           | MD                     | East Carolina University- Diabetes Research Center, BSOM, Lakeside Annex #4, 600 Moye Blvd, Greenville, NC 27834<br>UNITED STATES |
| 840605           | Biggs William                          | Principal Investigator           | MD                     | Amarillo Medical Specialists, LLP<br>1215 S Coulter St.<br>Suite 400<br>Amarillo<br>79106<br>Texas<br>UNITED STATES               |

\*CV provided as attachment to this appendix for all principal investigators

*Ensure that the printed copy of this document is the current version available on the Intranet.*

Property of the Sanofi Group - strictly confidential

Version Number: 4.0

28-JUL-2015



# SUPPLEMENTARY DATA

LIST OF PRINCIPAL INVESTIGATOR(S) AND SUB-INVESTIGATOR(S) PER STUDY SITE WHERE PATIENTS WERE ENROLLED

QSD-002219

Page 198 of 218

|                      |                |                    |          |
|----------------------|----------------|--------------------|----------|
| <b>Product Code:</b> | HOE901/AVE0010 | <b>Study Code:</b> | EFC12405 |
|----------------------|----------------|--------------------|----------|

| Study Center No. | Investigator last name and first name* | Role in the Investigation        | Professional Degree(s) | Institutional Affiliation(s)                                                                                        |
|------------------|----------------------------------------|----------------------------------|------------------------|---------------------------------------------------------------------------------------------------------------------|
| 840605           | Brantley Kenny                         | Sub-Investigator/Co-Investigator | MD, PhD                | Amarillo Medical Specialists, LLP<br>1215 S Coulter St.<br>Suite 400<br>Amarillo<br>79106<br>Texas<br>UNITED STATES |
| 840605           | Dodson Edwin                           | Sub-Investigator/Co-Investigator | MD                     | Amarillo Medical Specialists, LLP<br>1215 S Coulter St.<br>Suite 400<br>Amarillo<br>79106<br>Texas<br>UNITED STATES |
| 840605           | Usula Stephen                          | Sub-Investigator/Co-Investigator | MD, PhD                | Amarillo Medical Specialists, LLP<br>1215 S Coulter St.<br>Suite 400<br>Amarillo<br>79106<br>Texas<br>UNITED STATES |

\*CV provided as attachment to this appendix for all principal investigators

*Ensure that the printed copy of this document is the current version available on the Intranet.*

Property of the Sanofi Group - strictly confidential

Version Number: 4.0

28-JUL-2015

# SUPPLEMENTARY DATA

LIST OF PRINCIPAL INVESTIGATOR(S) AND SUB-INVESTIGATOR(S) PER STUDY SITE WHERE PATIENTS WERE ENROLLED

QSD-002219

Page 199 of 218

|                      |                |                    |          |
|----------------------|----------------|--------------------|----------|
| <b>Product Code:</b> | HOE901/AVE0010 | <b>Study Code:</b> | EFC12405 |
|----------------------|----------------|--------------------|----------|

| Study Center No. | Investigator last name and first name* | Role in the Investigation        | Professional Degree(s) | Institutional Affiliation(s)                                                                                      |
|------------------|----------------------------------------|----------------------------------|------------------------|-------------------------------------------------------------------------------------------------------------------|
| 840606           | Beasley Tammy                          | Sub-Investigator/Co-Investigator | LPN                    | National Clinical Research<br>2809 Emerywood Pkwy.<br>Suite 140<br>Richmond<br>23294<br>Virginia<br>UNITED STATES |
| 840606           | Doolittle Sarah                        | Sub-Investigator/Co-Investigator | BS                     | National Clinical Research<br>2809 Emerywood Pkwy.<br>Suite 140<br>Richmond<br>23294<br>Virginia<br>UNITED STATES |
| 840606           | Hoekstra John                          | Principal Investigator           | PhD,MD                 | National Clinical Research<br>2809 Emerywood Pkwy.<br>Suite 140<br>Richmond<br>23294<br>Virginia<br>UNITED STATES |

\*CV provided as attachment to this appendix for all principal investigators

*Ensure that the printed copy of this document is the current version available on the Intranet.*

Property of the Sanofi Group - strictly confidential

Version Number: 4.0

28-JUL-2015

# SUPPLEMENTARY DATA

LIST OF PRINCIPAL INVESTIGATOR(S) AND SUB-INVESTIGATOR(S) PER STUDY SITE WHERE PATIENTS WERE ENROLLED

QSD-002219

Page 200 of 218

|                      |                |                    |          |
|----------------------|----------------|--------------------|----------|
| <b>Product Code:</b> | HOE901/AVE0010 | <b>Study Code:</b> | EFC12405 |
|----------------------|----------------|--------------------|----------|

| Study Center No. | Investigator last name and first name* | Role in the Investigation        | Professional Degree(s) | Institutional Affiliation(s)                                                                                                              |
|------------------|----------------------------------------|----------------------------------|------------------------|-------------------------------------------------------------------------------------------------------------------------------------------|
| 840606           | Jeter William                          | Sub-Investigator/Co-Investigator | MD                     | National Clinical Research<br>2809 Emerywood Pkwy.<br>Suite 140<br>Richmond<br>23294<br>Virginia<br>UNITED STATES                         |
| 840606           | Mckenney James                         | Sub-Investigator/Co-Investigator | PhD                    | National Clinical Research<br>2809 Emerywood Pkwy.<br>Suite 140<br>Richmond<br>23294<br>Virginia<br>UNITED STATES                         |
| 840607           | Garvey Timothy                         | Principal Investigator           | MD                     | University of Alabama<br>Diabetes Research and Training<br>1675 University Avenue<br>Birmingham<br>35294-0002<br>Alabama<br>UNITED STATES |

\*CV provided as attachment to this appendix for all principal investigators

*Ensure that the printed copy of this document is the current version available on the Intranet.*

Property of the Sanofi Group - strictly confidential

Version Number: 4.0

28-JUL-2015

# SUPPLEMENTARY DATA

LIST OF PRINCIPAL INVESTIGATOR(S) AND SUB-INVESTIGATOR(S) PER STUDY SITE WHERE PATIENTS WERE ENROLLED

QSD-002219

Page 201 of 218

|                      |                |                    |          |
|----------------------|----------------|--------------------|----------|
| <b>Product Code:</b> | HOE901/AVE0010 | <b>Study Code:</b> | EFC12405 |
|----------------------|----------------|--------------------|----------|

| Study Center No. | Investigator last name and first name* | Role in the Investigation        | Professional Degree(s) | Institutional Affiliation(s)                                                                                                              |
|------------------|----------------------------------------|----------------------------------|------------------------|-------------------------------------------------------------------------------------------------------------------------------------------|
| 840607           | Soleymani Taraneh                      | Sub-Investigator/Co-Investigator | MD                     | University of Alabama<br>Diabetes Research and Training<br>1675 University Avenue<br>Birmingham<br>35294-0002<br>Alabama<br>UNITED STATES |
| 840608           | Gullapalli Dakshinamurty               | Sub-Investigator/Co-Investigator | MD                     | Salem VA Medical Center<br>1970 Roanoke Blvd.<br>Salem<br>24153<br>Virginia<br>UNITED STATES                                              |
| 840608           | <a href="#">Iranmanesh Ali</a>         | Principal Investigator           | MD                     | Salem VA Medical Center<br>1970 Roanoke Blvd.<br>Salem<br>24153<br>Virginia<br>UNITED STATES                                              |
| 840608           | Iranmanesh Ashraf                      | Sub-Investigator/Co-Investigator | PhD                    | Salem VA Medical Center<br>1970 Roanoke Blvd.<br>Salem<br>24153<br>Virginia<br>UNITED STATES                                              |

\*CV provided as attachment to this appendix for all principal investigators

*Ensure that the printed copy of this document is the current version available on the Intranet.*

Property of the Sanofi Group - strictly confidential

**Version Number: 4.0**

**28-JUL-2015**

# SUPPLEMENTARY DATA

LIST OF PRINCIPAL INVESTIGATOR(S) AND SUB-INVESTIGATOR(S) PER STUDY SITE WHERE PATIENTS WERE ENROLLED

QSD-002219

Page 202 of 218

|                      |                |                    |          |
|----------------------|----------------|--------------------|----------|
| <b>Product Code:</b> | HOE901/AVE0010 | <b>Study Code:</b> | EFC12405 |
|----------------------|----------------|--------------------|----------|

| Study Center No. | Investigator last name and first name* | Role in the Investigation        | Professional Degree(s) | Institutional Affiliation(s)                                                                                                 |
|------------------|----------------------------------------|----------------------------------|------------------------|------------------------------------------------------------------------------------------------------------------------------|
| 840609           | Ginsberg Daniel                        | Sub-Investigator/Co-Investigator | MD                     | MultiCare Health System<br>Cedar Research<br>1901 S Cedar St.<br>Suite 205<br>Tacoma<br>98405<br>Washington<br>UNITED STATES |
| 840609           | Graf Ronald                            | Principal Investigator           | MD                     | MultiCare Health System<br>Cedar Research<br>1901 S Cedar St.<br>Suite 205<br>Tacoma<br>98405<br>Washington<br>UNITED STATES |
| 840610           | Ahmed Intekhab                         | Principal Investigator           | MD                     | Thomas Jefferson University Hospital<br>211 S 9th St.<br>Philadelphia<br>19107<br>Pennsylvania<br>UNITED STATES              |

\*CV provided as attachment to this appendix for all principal investigators

*Ensure that the printed copy of this document is the current version available on the Intranet.*

Property of the Sanofi Group - strictly confidential

Version Number: 4.0

28-JUL-2015

# SUPPLEMENTARY DATA

LIST OF PRINCIPAL INVESTIGATOR(S) AND SUB-INVESTIGATOR(S) PER STUDY SITE WHERE PATIENTS WERE ENROLLED

QSD-002219

Page 203 of 218

|                      |                |                    |          |
|----------------------|----------------|--------------------|----------|
| <b>Product Code:</b> | HOE901/AVE0010 | <b>Study Code:</b> | EFC12405 |
|----------------------|----------------|--------------------|----------|

| Study Center No. | Investigator last name and first name* | Role in the Investigation        | Professional Degree(s) | Institutional Affiliation(s)                                                                                    |
|------------------|----------------------------------------|----------------------------------|------------------------|-----------------------------------------------------------------------------------------------------------------|
| 840610           | Furlong Kevin                          | Sub-Investigator/Co-Investigator | DO                     | Thomas Jefferson University Hospital<br>211 S 9th St.<br>Philadelphia<br>19107<br>Pennsylvania<br>UNITED STATES |
| 840610           | Jabbour Serge                          | Sub-Investigator/Co-Investigator | MD                     | Thomas Jefferson University Hospital<br>211 S 9th St.<br>Philadelphia<br>19107<br>Pennsylvania<br>UNITED STATES |
| 840610           | Miller Jeffrey Lynn                    | Sub-Investigator/Co-Investigator | MD                     | Thomas Jefferson University Hospital<br>211 S 9th St.<br>Philadelphia<br>19107<br>Pennsylvania<br>UNITED STATES |
| 840610           | Bischoff Lindsay                       | Sub-Investigator/Co-Investigator | MD                     | Thomas Jefferson University Hospital<br>211 S 9th St.<br>Philadelphia<br>19107<br>Pennsylvania<br>UNITED STATES |

\*CV provided as attachment to this appendix for all principal investigators

*Ensure that the printed copy of this document is the current version available on the Intranet.*

Property of the Sanofi Group - strictly confidential

Version Number: 4.0

28-JUL-2015

# SUPPLEMENTARY DATA

LIST OF PRINCIPAL INVESTIGATOR(S) AND SUB-INVESTIGATOR(S) PER STUDY SITE WHERE PATIENTS WERE ENROLLED

QSD-002219

Page 204 of 218

|                      |                |                    |          |
|----------------------|----------------|--------------------|----------|
| <b>Product Code:</b> | HOE901/AVE0010 | <b>Study Code:</b> | EFC12405 |
|----------------------|----------------|--------------------|----------|

| Study Center No. | Investigator last name and first name* | Role in the Investigation        | Professional Degree(s) | Institutional Affiliation(s)                                                                                      |
|------------------|----------------------------------------|----------------------------------|------------------------|-------------------------------------------------------------------------------------------------------------------|
| 840610           | Chou Brian                             | Sub-Investigator/Co-Investigator | MD                     | Thomas Jefferson University Hospital<br>211 S 9th St.<br>Philadelphia<br>19107<br>Pennsylvania<br>UNITED STATES   |
| 840610           | Singh Vinay                            | Sub-Investigator/Co-Investigator | MD                     | Thomas Jefferson University Hospital<br>211 S 9th St.<br>Philadelphia<br>19107<br>Pennsylvania<br>UNITED STATES   |
| 840610           | Dardi Inderpreet                       | Sub-Investigator/Co-Investigator | MD                     | Thomas Jefferson University Hospital<br>211 S 9th St.<br>Philadelphia<br>19107<br>Pennsylvania<br>UNITED STATES   |
| 840611           | Borgwardt Trista                       | Sub-Investigator/Co-Investigator | BS,RN                  | Regional Medical Clinic Endocrinology<br>640 Flormann St.<br>Rapid City<br>57701<br>South Dakota<br>UNITED STATES |

\*CV provided as attachment to this appendix for all principal investigators

*Ensure that the printed copy of this document is the current version available on the Intranet.*

Property of the Sanofi Group - strictly confidential

Version Number: 4.0

28-JUL-2015

# SUPPLEMENTARY DATA

LIST OF PRINCIPAL INVESTIGATOR(S) AND SUB-INVESTIGATOR(S) PER STUDY SITE WHERE PATIENTS WERE ENROLLED

QSD-002219

Page 205 of 218

|                      |                |                    |          |
|----------------------|----------------|--------------------|----------|
| <b>Product Code:</b> | HOE901/AVE0010 | <b>Study Code:</b> | EFC12405 |
|----------------------|----------------|--------------------|----------|

| Study Center No. | Investigator last name and first name* | Role in the Investigation        | Professional Degree(s) | Institutional Affiliation(s)                                                                                      |
|------------------|----------------------------------------|----------------------------------|------------------------|-------------------------------------------------------------------------------------------------------------------|
| 840611           | DeRaad Linda                           | Sub-Investigator/Co-Investigator | BSN                    | Regional Medical Clinic Endocrinology<br>640 Flormann St.<br>Rapid City<br>57701<br>South Dakota<br>UNITED STATES |
| 840611           | Edelen Rachel                          | Sub-Investigator/Co-Investigator | MD                     | Regional Medical Clinic Endocrinology<br>640 Flormann St.<br>Rapid City<br>57701<br>South Dakota<br>UNITED STATES |
| 840611           | Kieffer Tosha                          | Sub-Investigator/Co-Investigator | RN, CCRP               | Regional Medical Clinic Endocrinology<br>640 Flormann St.<br>Rapid City<br>57701<br>South Dakota<br>UNITED STATES |
| 840611           | Repas Thomas                           | Principal Investigator           | DO                     | Regional Medical Clinic Endocrinology<br>640 Flormann St.<br>Rapid City<br>57701<br>South Dakota<br>UNITED STATES |

\*CV provided as attachment to this appendix for all principal investigators

*Ensure that the printed copy of this document is the current version available on the Intranet.*

Property of the Sanofi Group - strictly confidential

Version Number: 4.0

28-JUL-2015



# SUPPLEMENTARY DATA

LIST OF PRINCIPAL INVESTIGATOR(S) AND SUB-INVESTIGATOR(S) PER STUDY SITE WHERE PATIENTS WERE ENROLLED

QSD-002219

Page 206 of 218

|                      |                |                    |          |
|----------------------|----------------|--------------------|----------|
| <b>Product Code:</b> | HOE901/AVE0010 | <b>Study Code:</b> | EFC12405 |
|----------------------|----------------|--------------------|----------|

| Study Center No. | Investigator last name and first name* | Role in the Investigation        | Professional Degree(s) | Institutional Affiliation(s)                                                                                                          |
|------------------|----------------------------------------|----------------------------------|------------------------|---------------------------------------------------------------------------------------------------------------------------------------|
| 840611           | Wasson Michelle                        | Sub-Investigator/Co-Investigator | CHAPA-C                | Regional Medical Clinic Endocrinology<br>640 Flormann St.<br>Rapid City<br>57701<br>South Dakota<br>UNITED STATES                     |
| 840612           | Ahmed Azazuddin                        | Sub-Investigator/Co-Investigator | MD                     | Chicago Clinical Research Institute Inc.<br>2555 S Martin Luther King Dr.<br>2nd Fl.<br>Chicago<br>60616<br>Illinois<br>UNITED STATES |
| 840612           | Kenney Barbara                         | Sub-Investigator/Co-Investigator | NP-C                   | Chicago Clinical Research Institute Inc.<br>2555 S Martin Luther King Dr.<br>2nd Fl.<br>Chicago<br>60616<br>Illinois<br>UNITED STATES |

\*CV provided as attachment to this appendix for all principal investigators

*Ensure that the printed copy of this document is the current version available on the Intranet.*

Property of the Sanofi Group - strictly confidential

Version Number: 4.0

28-JUL-2015

# SUPPLEMENTARY DATA

LIST OF PRINCIPAL INVESTIGATOR(S) AND SUB-INVESTIGATOR(S) PER STUDY SITE WHERE PATIENTS WERE ENROLLED

QSD-002219

Page 207 of 218

|                      |                |                    |          |
|----------------------|----------------|--------------------|----------|
| <b>Product Code:</b> | HOE901/AVE0010 | <b>Study Code:</b> | EFC12405 |
|----------------------|----------------|--------------------|----------|

| Study Center No. | Investigator last name and first name* | Role in the Investigation        | Professional Degree(s) | Institutional Affiliation(s)                                                                                                          |
|------------------|----------------------------------------|----------------------------------|------------------------|---------------------------------------------------------------------------------------------------------------------------------------|
| 840612           | Kuehl Ann                              | Sub-Investigator/Co-Investigator | PA-C                   | Chicago Clinical Research Institute Inc.<br>2555 S Martin Luther King Dr.<br>2nd Fl.<br>Chicago<br>60616<br>Illinois<br>UNITED STATES |
| 840612           | Levinson Dennis                        | Principal Investigator           | MD                     | Chicago Clinical Research Institute Inc.<br>2555 S Martin Luther King Dr.<br>2nd Fl.<br>Chicago<br>60616<br>Illinois<br>UNITED STATES |
| 840613           | Gilbert Matthew                        | Principal Investigator           | DO                     | Fletcher Allen Healthcare,<br>62 Tilley Drive,<br>South Burlington,<br>05403<br>VT<br>UNITED STATES                                   |

\*CV provided as attachment to this appendix for all principal investigators

*Ensure that the printed copy of this document is the current version available on the Intranet.*

Property of the Sanofi Group - strictly confidential

Version Number: 4.0

28-JUL-2015

# SUPPLEMENTARY DATA

LIST OF PRINCIPAL INVESTIGATOR(S) AND SUB-INVESTIGATOR(S) PER STUDY SITE WHERE PATIENTS WERE ENROLLED

QSD-002219

Page 208 of 218

|                      |                |                    |          |
|----------------------|----------------|--------------------|----------|
| <b>Product Code:</b> | HOE901/AVE0010 | <b>Study Code:</b> | EFC12405 |
|----------------------|----------------|--------------------|----------|

| Study Center No. | Investigator last name and first name* | Role in the Investigation        | Professional Degree(s) | Institutional Affiliation(s)                                                                        |
|------------------|----------------------------------------|----------------------------------|------------------------|-----------------------------------------------------------------------------------------------------|
| 840613           | Marney Annis                           | Sub-Investigator/Co-Investigator | MD                     | Fletcher Allen Healthcare,<br>62 Tilley Drive,<br>South Burlington,<br>05403<br>VT<br>UNITED STATES |
| 840613           | Roth Marilyn                           | Sub-Investigator/Co-Investigator | RN                     | Fletcher Allen Healthcare,<br>62 Tilley Drive,<br>South Burlington,<br>05403<br>VT<br>UNITED STATES |
| 840613           | Schnure Joel                           | Sub-Investigator/Co-Investigator | MD                     | Fletcher Allen Healthcare,<br>62 Tilley Drive,<br>South Burlington,<br>05403<br>VT<br>UNITED STATES |
| 840613           | Thottan Anna Paul                      | Sub-Investigator/Co-Investigator | MD                     | Fletcher Allen Healthcare,<br>62 Tilley Drive,<br>South Burlington,<br>05403<br>VT<br>UNITED STATES |

\*CV provided as attachment to this appendix for all principal investigators

*Ensure that the printed copy of this document is the current version available on the Intranet.*

Property of the Sanofi Group - strictly confidential

Version Number: 4.0

28-JUL-2015

# SUPPLEMENTARY DATA

LIST OF PRINCIPAL INVESTIGATOR(S) AND SUB-INVESTIGATOR(S) PER STUDY SITE WHERE PATIENTS WERE ENROLLED

QSD-002219

Page 209 of 218

|                      |                |                    |          |
|----------------------|----------------|--------------------|----------|
| <b>Product Code:</b> | HOE901/AVE0010 | <b>Study Code:</b> | EFC12405 |
|----------------------|----------------|--------------------|----------|

| Study Center No. | Investigator last name and first name* | Role in the Investigation        | Professional Degree(s) | Institutional Affiliation(s)                                                                                    |
|------------------|----------------------------------------|----------------------------------|------------------------|-----------------------------------------------------------------------------------------------------------------|
| 840614           | Dennis Benjamin Adam                   | Sub-Investigator/Co-Investigator | MD                     | Southern Diabetes Foundation<br>2425 Brookstone Centre Parkway<br>Columbus<br>31904<br>Georgia<br>UNITED STATES |
| 840614           | Leichter Steven                        | Principal Investigator           | MD                     | Southern Diabetes Foundation<br>2425 Brookstone Centre Parkway<br>Columbus<br>31904<br>Georgia<br>UNITED STATES |
| 840615           | Allaw Mohammed                         | Principal Investigator           | MD                     | Clinical Research Advantage<br>991 Kenmore Drive<br>Evansville<br>47714<br>Indiana<br>UNITED STATES             |
| 840615           | Inzerello Anthony                      | Sub-Investigator/Co-Investigator | MD                     | Clinical Research Advantage<br>991 Kenmore Drive<br>Evansville<br>47714<br>Indiana<br>UNITED STATES             |

\*CV provided as attachment to this appendix for all principal investigators

*Ensure that the printed copy of this document is the current version available on the Intranet.*

Property of the Sanofi Group - strictly confidential

Version Number: 4.0

28-JUL-2015

# SUPPLEMENTARY DATA

LIST OF PRINCIPAL INVESTIGATOR(S) AND SUB-INVESTIGATOR(S) PER STUDY SITE WHERE PATIENTS WERE ENROLLED

QSD-002219

Page 210 of 218

|                      |                |                    |          |
|----------------------|----------------|--------------------|----------|
| <b>Product Code:</b> | HOE901/AVE0010 | <b>Study Code:</b> | EFC12405 |
|----------------------|----------------|--------------------|----------|

| Study Center No. | Investigator last name and first name* | Role in the Investigation        | Professional Degree(s) | Institutional Affiliation(s)                                                                                    |
|------------------|----------------------------------------|----------------------------------|------------------------|-----------------------------------------------------------------------------------------------------------------|
| 840615           | Morrison Kimberly Diane                | Sub-Investigator/Co-Investigator | BA                     | Clinical Research Advantage<br>991 Kenmore Drive<br>Evansville<br>47714<br>Indiana<br>UNITED STATES             |
| 840615           | Schucker Georgettea                    | Sub-Investigator/Co-Investigator | CMA, CCRC              | Clinical Research Advantage<br>991 Kenmore Drive<br>Evansville<br>47714<br>Indiana<br>UNITED STATES             |
| 840617           | Gabriel John                           | Principal Investigator           | MD                     | North Hills Med Research<br>4351 Booth Calloway Suite 101<br>N Richland Hill<br>76180<br>Texas<br>UNITED STATES |
| 840617           | Lambert Joseph                         | Sub-Investigator/Co-Investigator | MD                     | North Hills Med Research<br>4351 Booth Calloway Suite 101<br>N Richland Hill<br>76180<br>Texas<br>UNITED STATES |

\*CV provided as attachment to this appendix for all principal investigators

*Ensure that the printed copy of this document is the current version available on the Intranet.*

Property of the Sanofi Group - strictly confidential

Version Number: 4.0

28-JUL-2015

# SUPPLEMENTARY DATA

LIST OF PRINCIPAL INVESTIGATOR(S) AND SUB-INVESTIGATOR(S) PER STUDY SITE WHERE PATIENTS WERE ENROLLED

QSD-002219

Page 211 of 218

|                      |                |                    |          |
|----------------------|----------------|--------------------|----------|
| <b>Product Code:</b> | HOE901/AVE0010 | <b>Study Code:</b> | EFC12405 |
|----------------------|----------------|--------------------|----------|

| Study Center No. | Investigator last name and first name* | Role in the Investigation        | Professional Degree(s) | Institutional Affiliation(s)                                                                                    |
|------------------|----------------------------------------|----------------------------------|------------------------|-----------------------------------------------------------------------------------------------------------------|
| 840617           | Magouirk Trisha                        | Sub-Investigator/Co-Investigator | CRC                    | North Hills Med Research<br>4351 Booth Calloway Suite 101<br>N Richland Hill<br>76180<br>Texas<br>UNITED STATES |
| 840617           | Melliza Ted                            | Sub-Investigator/Co-Investigator | CRC                    | North Hills Med Research<br>4351 Booth Calloway Suite 101<br>N Richland Hill<br>76180<br>Texas<br>UNITED STATES |
| 840617           | Vela Matthew                           | Sub-Investigator/Co-Investigator | CRC                    | North Hills Med Research<br>4351 Booth Calloway Suite 101<br>N Richland Hill<br>76180<br>Texas<br>UNITED STATES |
| 840618           | Bailey Douglas                         | Sub-Investigator/Co-Investigator | MD                     | Williamette Valley Clinical Studies<br>890 River Road<br>Eugene<br>97404<br>Oregon<br>UNITED STATES             |

\*CV provided as attachment to this appendix for all principal investigators

*Ensure that the printed copy of this document is the current version available on the Intranet.*

Property of the Sanofi Group - strictly confidential

Version Number: 4.0

28-JUL-2015

# SUPPLEMENTARY DATA

LIST OF PRINCIPAL INVESTIGATOR(S) AND SUB-INVESTIGATOR(S) PER STUDY SITE WHERE PATIENTS WERE ENROLLED

QSD-002219

Page 212 of 218

|                      |                |                    |          |
|----------------------|----------------|--------------------|----------|
| <b>Product Code:</b> | HOE901/AVE0010 | <b>Study Code:</b> | EFC12405 |
|----------------------|----------------|--------------------|----------|

| Study Center No. | Investigator last name and first name* | Role in the Investigation        | Professional Degree(s) | Institutional Affiliation(s)                                                                                           |
|------------------|----------------------------------------|----------------------------------|------------------------|------------------------------------------------------------------------------------------------------------------------|
| 840618           | Buchanan Patricia                      | Principal Investigator           | MD                     | Williamette Valley Clinical Studies<br>890 River Road<br>Eugene<br>97404<br>Oregon<br>UNITED STATES                    |
| 840618           | DeBroekert Dirk                        | Sub-Investigator/Co-Investigator | PA-C                   | Williamette Valley Clinical Studies<br>890 River Road<br>Eugene<br>97404<br>Oregon<br>UNITED STATES                    |
| 840618           | VanCleave Brady                        | Sub-Investigator/Co-Investigator | CCRC                   | Williamette Valley Clinical Studies<br>890 River Road<br>Eugene<br>97404<br>Oregon<br>UNITED STATES                    |
| 840621           | Creamer Maily                          | Sub-Investigator/Co-Investigator | DO                     | St. Joseph Heritage Healthcare,<br>510 Superior Avenue,<br>Suite # 200B-F,<br>Newport Beach,<br>92663<br>UNITED STATES |

\*CV provided as attachment to this appendix for all principal investigators

*Ensure that the printed copy of this document is the current version available on the Intranet.*

Property of the Sanofi Group - strictly confidential

Version Number: 4.0

28-JUL-2015

# SUPPLEMENTARY DATA

LIST OF PRINCIPAL INVESTIGATOR(S) AND SUB-INVESTIGATOR(S) PER STUDY SITE WHERE PATIENTS WERE ENROLLED

QSD-002219

Page 213 of 218

|                      |                |                    |          |
|----------------------|----------------|--------------------|----------|
| <b>Product Code:</b> | HOE901/AVE0010 | <b>Study Code:</b> | EFC12405 |
|----------------------|----------------|--------------------|----------|

| Study Center No. | Investigator last name and first name* | Role in the Investigation        | Professional Degree(s) | Institutional Affiliation(s)                                                                                            |
|------------------|----------------------------------------|----------------------------------|------------------------|-------------------------------------------------------------------------------------------------------------------------|
| 840621           | Nadeau Daniel                          | Principal Investigator           | MD                     | St. Joseph Heritage Healthcare,<br>510 Superior Avenue,<br>Suite # 200B-F,<br>Newport Beach,<br>92663<br>UNITED STATES  |
| 840622           | Bates Daniel                           | Sub-Investigator/Co-Investigator | MD                     | Medical Research South<br>1481 Tobias Gadson Blvd.<br>Suite 2<br>Charleston<br>29407<br>South Carolina<br>UNITED STATES |
| 840622           | Crisp Melissa                          | Sub-Investigator/Co-Investigator | CRC                    | Medical Research South<br>1481 Tobias Gadson Blvd.<br>Suite 2<br>Charleston<br>29407<br>South Carolina<br>UNITED STATES |

\*CV provided as attachment to this appendix for all principal investigators

*Ensure that the printed copy of this document is the current version available on the Intranet.*

Property of the Sanofi Group - strictly confidential

Version Number: 4.0

28-JUL-2015



# SUPPLEMENTARY DATA

LIST OF PRINCIPAL INVESTIGATOR(S) AND SUB-INVESTIGATOR(S) PER STUDY SITE WHERE PATIENTS WERE ENROLLED

QSD-002219

Page 214 of 218

|                      |                |                    |          |
|----------------------|----------------|--------------------|----------|
| <b>Product Code:</b> | HOE901/AVE0010 | <b>Study Code:</b> | EFC12405 |
|----------------------|----------------|--------------------|----------|

| Study Center No. | Investigator last name and first name* | Role in the Investigation        | Professional Degree(s) | Institutional Affiliation(s)                                                                                            |
|------------------|----------------------------------------|----------------------------------|------------------------|-------------------------------------------------------------------------------------------------------------------------|
| 840622           | Fyall Shalyn                           | Sub-Investigator/Co-Investigator | CRC                    | Medical Research South<br>1481 Tobias Gadson Blvd.<br>Suite 2<br>Charleston<br>29407<br>South Carolina<br>UNITED STATES |
| 840622           | Hurley Donald                          | Principal Investigator           | DO                     | Medical Research South<br>1481 Tobias Gadson Blvd.<br>Suite 2<br>Charleston<br>29407<br>South Carolina<br>UNITED STATES |
| 840622           | Kinney Laura Lee                       | Sub-Investigator/Co-Investigator | MD                     | Medical Research South<br>1481 Tobias Gadson Blvd.<br>Suite 2<br>Charleston<br>29407<br>South Carolina<br>UNITED STATES |

\*CV provided as attachment to this appendix for all principal investigators

*Ensure that the printed copy of this document is the current version available on the Intranet.*

Property of the Sanofi Group - strictly confidential

Version Number: 4.0

28-JUL-2015

# SUPPLEMENTARY DATA

LIST OF PRINCIPAL INVESTIGATOR(S) AND SUB-INVESTIGATOR(S) PER STUDY SITE WHERE PATIENTS WERE ENROLLED

QSD-002219

Page 215 of 218

|                      |                |                    |          |
|----------------------|----------------|--------------------|----------|
| <b>Product Code:</b> | HOE901/AVE0010 | <b>Study Code:</b> | EFC12405 |
|----------------------|----------------|--------------------|----------|

| Study Center No. | Investigator last name and first name* | Role in the Investigation        | Professional Degree(s) | Institutional Affiliation(s)                                                                                            |
|------------------|----------------------------------------|----------------------------------|------------------------|-------------------------------------------------------------------------------------------------------------------------|
| 840622           | Perry Shannon                          | Sub-Investigator/Co-Investigator | CRC                    | Medical Research South<br>1481 Tobias Gadson Blvd.<br>Suite 2<br>Charleston<br>29407<br>South Carolina<br>UNITED STATES |
| 840622           | Reinhardt Tatiana                      | Sub-Investigator/Co-Investigator | BS                     | Medical Research South<br>1481 Tobias Gadson Blvd.<br>Suite 2<br>Charleston<br>29407<br>South Carolina<br>UNITED STATES |
| 840623           | Gupta Ramesh                           | Sub-Investigator/Co-Investigator | MD                     | Kindred Medical Institute,<br>854 Magnolia Avenue,<br>Suite C,<br>Corona,<br>92879<br>UNITED STATES                     |
| 840623           | Khan Talat                             | Sub-Investigator/Co-Investigator | MD                     | Kindred Medical Institute,<br>854 Magnolia Avenue,<br>Suite C,<br>Corona,<br>92879<br>UNITED STATES                     |

\*CV provided as attachment to this appendix for all principal investigators

*Ensure that the printed copy of this document is the current version available on the Intranet.*

Property of the Sanofi Group - strictly confidential

Version Number: 4.0

28-JUL-2015

# SUPPLEMENTARY DATA

LIST OF PRINCIPAL INVESTIGATOR(S) AND SUB-INVESTIGATOR(S) PER STUDY SITE WHERE PATIENTS WERE ENROLLED

QSD-002219

Page 216 of 218

|                      |                |                    |          |
|----------------------|----------------|--------------------|----------|
| <b>Product Code:</b> | HOE901/AVE0010 | <b>Study Code:</b> | EFC12405 |
|----------------------|----------------|--------------------|----------|

| Study Center No. | Investigator last name and first name* | Role in the Investigation        | Professional Degree(s) | Institutional Affiliation(s)                                                                                    |
|------------------|----------------------------------------|----------------------------------|------------------------|-----------------------------------------------------------------------------------------------------------------|
| 840623           | Mahmud Mohammad                        | Principal Investigator           | MD, PhD,               | Kindred Medical Institute,<br>854 Magnolia Avenue,<br>Suite C,<br>Corona,<br>92879<br>UNITED STATES             |
| 840625           | Dashiell Carrie                        | Sub-Investigator/Co-Investigator | CRC                    | York Clinical Research, LLC,<br>142 West York Street,<br>Suite 905,<br>Norfolk,<br>23510<br>VA<br>UNITED STATES |
| 840625           | Lovell Charles                         | Principal Investigator           | MD                     | York Clinical Research, LLC,<br>142 West York Street,<br>Suite 905,<br>Norfolk,<br>23510<br>UNITED STATES       |
| 840625           | Newby James                            | Sub-Investigator/Co-Investigator | MD                     | York Clinical Research, LLC,<br>142 West York Street,<br>Suite 905,<br>Norfolk,<br>23510<br>VA<br>UNITED STATES |

\*CV provided as attachment to this appendix for all principal investigators

*Ensure that the printed copy of this document is the current version available on the Intranet.*

Property of the Sanofi Group - strictly confidential

Version Number: 4.0

28-JUL-2015

# SUPPLEMENTARY DATA

LIST OF PRINCIPAL INVESTIGATOR(S) AND SUB-INVESTIGATOR(S) PER STUDY SITE WHERE PATIENTS WERE ENROLLED

QSD-002219

Page 217 of 218

|                      |                |                    |          |
|----------------------|----------------|--------------------|----------|
| <b>Product Code:</b> | HOE901/AVE0010 | <b>Study Code:</b> | EFC12405 |
|----------------------|----------------|--------------------|----------|

| Study Center No. | Investigator last name and first name* | Role in the Investigation        | Professional Degree(s) | Institutional Affiliation(s)                                                                                  |
|------------------|----------------------------------------|----------------------------------|------------------------|---------------------------------------------------------------------------------------------------------------|
| 840626           | Alvarado Regina                        | Sub-Investigator/Co-Investigator | MA                     | Downtown LA Research Center, Inc<br>1125 W. 6th Street<br>Los Angeles<br>90017<br>California<br>UNITED STATES |
| 840626           | Cisneros Claudia                       | Sub-Investigator/Co-Investigator | MA                     | Downtown LA Research Center, Inc<br>1125 W. 6th Street<br>Los Angeles<br>90017<br>California<br>UNITED STATES |
| 840626           | <a href="#">Nadkarni Salil</a>         | Principal Investigator           | DO                     | Downtown LA Research Center, Inc<br>1125 W. 6th Street<br>Los Angeles<br>90017<br>California<br>UNITED STATES |
| 840626           | Orellana Jose                          | Sub-Investigator/Co-Investigator | CRC                    | Downtown LA Research Center, Inc<br>1125 W. 6th Street<br>Los Angeles<br>90017<br>California<br>UNITED STATES |

\*CV provided as attachment to this appendix for all principal investigators

*Ensure that the printed copy of this document is the current version available on the Intranet.*

Property of the Sanofi Group - strictly confidential

Version Number: 4.0

28-JUL-2015

# SUPPLEMENTARY DATA

LIST OF PRINCIPAL INVESTIGATOR(S) AND SUB-INVESTIGATOR(S) PER STUDY SITE WHERE PATIENTS WERE ENROLLED

QSD-002219

Page 218 of 218

|                      |                |                    |          |
|----------------------|----------------|--------------------|----------|
| <b>Product Code:</b> | HOE901/AVE0010 | <b>Study Code:</b> | EFC12405 |
|----------------------|----------------|--------------------|----------|

| Study Center No. | Investigator last name and first name* | Role in the Investigation        | Professional Degree(s) | Institutional Affiliation(s)                                                                                  |
|------------------|----------------------------------------|----------------------------------|------------------------|---------------------------------------------------------------------------------------------------------------|
| 840626           | Tizon Lorenzo                          | Sub-Investigator/Co-Investigator | MD                     | Downtown LA Research Center, Inc<br>1125 W. 6th Street<br>Los Angeles<br>90017<br>California<br>UNITED STATES |

\*CV provided as attachment to this appendix for all principal investigators

*Ensure that the printed copy of this document is the current version available on the Intranet.*

Property of the Sanofi Group - strictly confidential

**Version Number: 4.0**

**28-JUL-2015**
